# Supplementary material
Source: PubMed Central journal article supplement (PMC6484814)
Supplement: jama-321-1466-s001.pdf [file jama-321-1466-s001.pdf]

## Supplementary Online Content

Rosenstock J, Allison D, Birkenfeld AL, et al; for the PIONEER 3 Investigators. Effect of additional oral semaglutide vs sitagliptin on glycated hemoglobin in adults with type 2 diabetes uncontrolled with metformin alone or with sulfonylurea: the PIONEER 3 randomized clinical trial [published online March 23, 2019]. *JAMA*. doi:10.1001/jama.2019.2942

**eAppendix 1.** PIONEER 3 Investigators

**eAppendix 2.** Trial Product Administration

**eAppendix 3.** Description of Patient-Reported Outcomes

**eAppendix 4.** Estimands

**eAppendix 5.** Statistical Considerations

**eFigure 1.** Trial Design

**eFigure 2.** Boxplots of Observed HbA<sub>1c</sub> and Body Weight Over Time

**eFigure 3.** Sensitivity Analyses for Changes From Baseline in HbA<sub>1c</sub> and Body Weight at Week 26 for the Treatment Policy Estimand

**eFigure 4.** Distributions of HbA<sub>1c</sub> and Fasting Plasma Glucose Values at Baseline and Weeks 26, 52 and 78

**eFigure 5.** Change From Baseline in Impact of Weight on Quality of Life-Lite Clinical Trial Version Questionnaire Scores

**eFigure 6.** Change From Baseline in Short Form-36 Version 2 (Acute Version) Health Survey Summary Scores

**eFigure 7.** Change From Baseline in Control of Eating Questionnaire Domain Scores

**eFigure 8.** Overview of On-Treatment Nausea Events

**eTable 1.** List of Inclusion and Exclusion Criteria

**eTable 2.** Rescue Medication and Additional Glucose-Lowering Medication Use

**eTable 3.** Tipping Point Analyses for Changes From Baseline in HbA<sub>1c</sub> and Body Weight at Week 26 for the Treatment Policy Estimand

**eTable 4.** Time to Rescue Medication and Additional Glucose-Lowering Medication

**eTable 5.** Additional Secondary Endpoints Not Included in the Main Text

**eTable 6.** On-Treatment Adverse Events Leading to Discontinuation by System Organ Class/Preferred Term

**eTable 7.** On-Treatment Hypoglycemic Episodes

**eTable 8.** In-Trial Adverse Events Related to Diabetic Retinopathy

**eTable 9.** External Event Adjudication Committee–Confirmed Events and Selected In-Trial Adverse Events

**eTable 10.** Additional Safety Parameters

**eTable 11.** In-Trial Anti-Semaglutide Antibodies

**eReferences**

This supplementary material has been provided by the authors to give readers additional information about their work.

## eAppendix 1. PIONEER 3 Investigators

**Argentina:** Jorge Waitman, Centro Diabetologico Cordoba, Cordoba; Elizabeth Gelersztejn, CEDIC, CABA; Federico Perez Manghi, CINME, Capital Federal; Lucrecia Nardone, CEMAIC, Córdoba; Silvia Orio, IMOBA, CABA.

**Brazil:** Freddy Eliaschewitz, CPCLIN, São Paulo.

**France:** Alain Boye, Nouvelles Cliniques Nantaises, Nantes; Didier Gouet, C.H., La Rochelle; Gerard Fradet, C.H.D. La Roche-sur-Yon, La Roche-sur-Yon; Hervé Gullet, Centre Hospitalier, Chalons-en-Champagne; Hervé Narbonne, Clinique Bouchard, Marseille; Jean-Francois Thuan, C.H.G. de Narbonne, Narbonne; Philippe Remaud, Cabinet Remaud, Angers; Pierre Serusclat, GHM Portes du Sud, Venissieux; Sylvaine Clavel, Fondation Hôtel-Dieu, Le Creusot; Bruno Verges, C.H.U. Du Bocage, Dijon; Michel Marre, Hôpital Bichat, Paris.

**Germany:** Mauricio Sendeski, Synexus Leipzig, Leipzig; Jörg Lüdemann, Lüdemann, Falkensee; Ludger Rose, Rose, Münster; Michael Esser, Esser, Essen; Ralf Denger, Denger, Friedrichsthal; Ralf Jordan, Jordan, Berlin; Rudolf Erlinger, Erlinger, Stuttgart; Simon Vidal, Diabetespraxis Mergentheim, Bad Mergentheim; Ulrich Wendisch, Wendisch/Dahl Hamburg, Hamburg; Alexander Segner, Segner, St. Ingbert-Oberwürzbach; Andreas Hagenow, Hagenow, Elsterwerda; Andreas Birkenfeld, GWT-TUD Dresden, Dresden.

**Israel:** Adiv Goldhaber, Clalit Health Services Ra'anana, Ra'anana; Dan Nabriski, Meir Medical Center, Kfar Saba; Julio Wainstein, Wolfson MC, Holon, and DMC, Tel Aviv; Ofri Mosenzon, Hadassah Ein Karem, Jerusalem; Ilan Shimon, Beilinson Endocrinology, Petah-Tikva; Naftali Stern, Sourasky MC-Endocrinology, Tel Aviv; Naim Shehadeh, Rambam MC - Children A, Haifa.

**Japan:** Akira Yamauchi, Suruga Clinic, Shizuoka-shi, Shizuoka; Arihiro Kiyosue, Tokyo-Eki Center-building Clin, Chuo-ku, Tokyo; Daisuke Chujo, National Center Global Health, Shinjuku-ku, Tokyo; Seiki Wada, Musashifujisawa Central Clinic, Iruma-shi, Saitama; Seiya Hagiwara, Manda Memorial Hospital, Sapporo-shi, Hokkaido; Shinichiro Shirabe, H.E.C Science Clinic, Yokohama-shi, Kanagawa; Shizuka Kaneko, Takatsuki Red Cross Hospital, Takatsuki-shi, Osaka; Shizuo Kajiyama, Kajiyama Clinic, Kyoto-shi, Kyoto; Shuji Nakamura, Heiwadai Hospital Internal, Miyazaki-shi, Miyazaki; Takeshi Miyatsuka, Juntendo University Hospital, Bunkyo-ku, Tokyo; Takeshi Osonoi, Naka Kinen Clinic, Naka-shi, Ibaraki; Toshihiko Shiraiwal, Shiraiwa Clinic, Kashiwara-shi, Osaka; Toshio Kawada, Kawada Clinic, Ota-shi, Gunma; Tsunehito Suzuki, Shintomi Medical Clinic, Asahikawa-shi, Hokkaido; Yumiko Ide, Tokyo Center Clinic, Chuo-ku, Tokyo; Nobuyuki Azuma, Takeda General Hospital, Kyoto-shi, Kyoto.

**Mexico:** Rafael Margarito Violante Ortiz, CEI, Tampico, Tamaulipas; Rodrigo Suarez-Otero, INBIOMEDyC Toluca, Toluca, Estado de México; Silvia Jimenez-Ramos, CICEJ, Guadalajara, Jalisco; Enrique Morales Villegas, Centro de Investigación, Aguascalientes, Aguascalientes; Ignacio Rodriguez Briones, Cardioarritmias, San Luis Potosi, San Luis Potosi.

**Romania:** Adriana Onaca, Grand Med, Oradea; Carmen Tutescu, Spitalul Judetean Pitesti, Pitesti; Cristian Serafinceanu, IDNBM Prof Dr N Paulescu, Bucharest; Daniela Ciomos, S.C. Cosamext S.R.L., Targu Mures; Iosif Szilagyi, County Emergency Hospital, Satu Mare; Lavinia Pop, CMI Lavinia Pop, Baia Mare; Maria Mota, Clinical County Emergency Hospital, Craiova; Mihaela Busegeanu, CMI Busegeanu, Ploiesti; Mihaela Vlaiculescu, Diabnutrimed, Bucharest; Mircea Munteanu, Centrul Medical Sfantul Stefan, Timisoara; Olimpia Gutu, Olimpia Med SRL, Iasi; Romulus Timar, Spitalul Judetean Timisoara, Timisoara.

**Russian Federation:** Ludmila Ruyatkina, CH1 NSMU, Novosibirsk; Maria Yanovskaya, Yaroslavl Regional Hospital, Yaroslavl; Marina Kalashnikova, Sechenov MSMU, Moscow; Marina Sergeeva-Kondrachenko, Penza Reginal Hospital, Penza; Marina Shestakova, NMRCE, Moscow; Marina Kharakhulakh, Tomsk Regional Clinical Hospital, Tomsk; Yulia SamoiloVA, SSMU, Tomsk; Tatyana Lysenko, City Hospital #5, Barnaul.

**South Africa:** Essack Mitha, Newtown Clinical Research, Johannesburg; Deepak Lakha, Dr Lakha's Rooms, Johannesburg; Duma Khutsoane, Medi-Clinic Bloemfontein, Bloemfontein; G.C. Ellis, Synexus Helderberg Clinical, Cape Town; Gracjan Podgorski, Greenacres Hospital, Port Elizabeth; Isak Vermooten, Dr Isak Vermooten, Krugersdorp; Matthys Basson, Tiervlei Trial Centre, Cape Town; Mokgadi Mogashoa, Botho ke Bontle Health Service, Pretoria; Qasim Bhorat, Soweto CTC, Johannesburg; Vimladhev Govender, Westcliff Research Centre, Durban; Larry Distiller, Centre for Diabetes, Johannesburg.

**Turkey:** Seda Sancak, FSM - Dahiliye Poliklinigi, Istanbul; Aysegul Atmaca, Samsun Ondokuz Mayıs, Samsun; Akin Dayan, Haydarpasa Numune, Istanbul; Aytekin Oguz, Goztepe Hospital, Istanbul; Dilek Berker, Ankara Numune Hospital, Ankara; Meral Mert, Bakirkoy EAH, Istanbul; Abdurrahman Comlekci, Dokuz Eylul University, Izmir; Ozcan Keskin, Kartal Hospital, Istanbul.

**Ukraine:** Iryna Bondarets, Cherkasy Regional Hospital, Cherkasy; Mariia Grachova, Mykolaiv, CH #1, endo, Mykolaiv; Olena Petrosyan, Odesa Region Clinical Hospital, Odesa; Petro Kuskalo, Regional Clinical Hospital, Zhytomyr; Liubov Sokolova, IEM of NAMSU, Kyiv; Viktoria Chernikova, Zaporozhye Reg Endo Disp, Zaporozhye; Nadiya Pasyechko, Ternopil Univ Clinic, Ternopil; Nadiya Skrypnyk, Ivano-Frankivsk NMU, Regional Clinic H, Ivano-Frankivsk.

**United Kingdom:** Andre Krzeminski, Albany House, Wellingborough; Anthony Gunstone, The Staploe Medical Centre, Soham; Carolyn Paul, Kiltarn Medical Centre, Crewe; Jamie Smith, Torbay Hospital, Torquay; John Wakeling, Ely Bridge Surgery, Cardiff; Mahesh Ganapathy, Haxey Surgery, Doncaster; Matt Capehorn, Clifton Medical Centre, Rotherham; Patrick English, Peninsula Medical School, Plymouth; Paul Conley, Bermuda Practice, Basingstoke; Rob Andrews, Musgrove Park Hospital, Taunton; Satyan Rajbhandari, Royal Preston Hospital, Preston; Sunil Nair, Countess Of Chester NHS Foundation, Chester; Usha Sukumaran, MeDiNova South, Sidcup; Melanie Davies, Leicester General Hospital, Leicester; Stephen Bain, JCRF – Swansea, Swansea.

**United States of America:** Almena Free, Pinnacle Research Group LLC, Anniston, Alabama; Andrew Brockmyre, Holston Medical Group Pc, Bristol, Tennessee; Audrey Lacour, Juno Research, LLC, Houston, Texas; Brian Snyder, Southgate Medical Group, LLP, West Seneca, New York; Carl Meisner, Carl R. Meisner Medical Clinic, Sugar Land, Texas; Chi Ha, Gateway Research Center, Poway, California; Christopher Case, Jefferson City Medical Group, Jefferson City, Missouri; Cynthia Bowman-Stroud, Four Rivers Clinical Research, Paducah, Kentucky; Dale Allison, Hillcrest Family Health Center, Waco, Texas; Daniel Koontz, Palmetto Institute Of Clinical, Pelzer, South Carolina; David Butuk, Solaris Clinical Research, Meridian, Idaho; David Fitz-Patrick, East West Medical Research Institute, Honolulu, Hawaii; David Trachtenbarg, UnityPoint Health, Peoria, Illinois; D. Eric Bolster, Palmetto Clinical Research, Summerville, South Carolina; Edward Busick, MassResearch, LLC, Waltham, Massachusetts; Eileen Palace, The Center for Sexual Health, Metairie, Louisiana; Elie Hage-Korban, KORE Cardiovascular Research, Jackson, Tennessee; Ellen Kim, Albuquerque Clinical Trials, Albuquerque, New Mexico; Eric Klein, Capital Clinical Research Center, Olympia, Washington; Etsegenet Ayele, Pacific Clinical Studies, Los Alamitos, California; Gary Bedel, Prestige Clinical Research, Franklin, Ohio; Glenn Gatipon, Sestron Clinical Research, Marietta, Georgia; Harold Bays, L-MARC Research Center, Louisville, Kentucky; Helena Rodbard, Endocrine And Metabolic Consultants, Rockville, Maryland; Helen Stacey, Diablo Clinical Research, Inc., Walnut Creek, California; Henry Naddaf, Toledo Clinic, Toledo, Ohio; Henry Traylor, Whiteville Medical Associates, Whiteville, North Carolina; Ildiko Lingvay, UT Southwestern Medical Center, Dallas, Texas; Isaac Dor, Clinical Investigation Specialists, Gurnee, Illinois; Jamal Hammoud, Elite Research Center, Flint, Michigan; James Andersen, Meridien Research, Spring Hill, Florida; James Kahrs, Heartland Research Associates, Park City, Kansas; Jane Rohlf, Premier Research Inc., Trenton, New Jersey; Jeffrey Pollock, Clinical Trial Research Associates, Plantation, Florida; John Champlin, Med Center Medical Clinic, Carmichael, California; John Pullman, Mercury Street Medical Group, Butte, Montana; Joseph Lomboy, Middle Georgia Clinical Research, Perry, Georgia; Joseph Moran, Piedmont Healthcare/Research, Statesville, North Carolina; Julio Rosenstock, Dallas Diabetes Research Center, Dallas, Texas; Kathleen Dungan, The Ohio State University Medical Center, Columbus, Ohio; Kathleen Harris, DCOL Center for Clinical Research, Longview, Texas; Kevin Cannon, PMG Research of Wilmington, LLC, Wilmington, North Carolina; Lenita Hanson, Hanson Clinical Research Center, Port Charlotte, Florida; Leslie Klaff, Rainier Clinical Research Center, Renton, Washington; Lubna Mirza, LION Research, Norman, Oklahoma; Lusiana Loman, Suncoast Clinical Research, New Port Richey, Florida; Mark Benson, American Health Network of Indiana, Avon, Indiana; Mark Pearson, High Point Clinical Trials Center, High Point, North Carolina; Matthew Gilbert, University of Vermont Medical Center, South Burlington, Vermont; Matthew Wenker, Sterling Research Group, Ltd., Cincinnati, Ohio; Michael Adams, Radiant Research Inc., Murray, Utah; Michael Chen, Corvallis Clinic PC Clinical Rearch Center, Corvallis, Oregon; Michael Jardula, Desert Medical Group Inc., Palm Springs, California; Michael Lillestol, Lillestol Research LLC, Fargo, North Dakota; Michael Link, Family Health Care, Kissimmee, Florida; Michael Magnotti, Holy Name Medical Center, Teaneck, New Jersey; Neda Rasouli, Denver Va Med Center, Denver, Colorado; Neil Farris, The Research Group of Lexington, Lexington, Kentucky; Nizar Daboul, Advanced Medical Research, Maumee, Ohio; Otis Barnum, Barnum Medical Research Inc., Natchitoches, Louisiana; Paul Norwood, Valley Research, Fresno, California; Peter Gagianas, Primary Care Research South, McMurray, Pennsylvania; Priscilla Hollander, Baylor Scott & White Endocrine, Dallas, Texas; Rajesh Patel, Lycoming Internal Medicine, Inc, Jersey Shore, Pennsylvania; Raul Gaona, Briggs Clinical Research, LLC, San Antonio, Texas; Richard Cutchin, Spectrum Medical Research, LLC, Gaffney, South Carolina; Richard Jackson, Dominion Medical Associates, Richmond, Virginia; Richard Murphy, Murphy Research Center, Humboldt, Tennessee; Robert Morin, Quality Research Inc, San Antonio, Texas; Ronald Hsieh, Sentral Clinical Research Service, Cincinnati, Ohio; Sady Alpizar, Clinical Research Trials of Florida, Tampa, Florida; Samir Arora, Aventiv Research, Columbus, Ohio; Sanford Plevin, Suncoast Clinical Research, Palm Harbor, Florida; Sashi Makam, Mid Hudson Medical Research, New

Windsor, New York; Sean Hurley, Rowan Research Inc, Spokane, Washington; Son Giep, Plano Internal Medicine Associates, Plano, Texas; Steven Bauer, OnSite Clinical Solutions, LLC, Charlotte, North Carolina; Steve Simpson, Applied Research Center of Arkansas, Little Rock, Arkansas; Stuart Stoller, Tri-County Research, Inc., Sterling Heights, Michigan; Tarek Hassanein, Southern California Research Center, Coronado, California; Terence Hart, Dr. Terence Hart, Tuscumbia, Alabama; Thomas Lenzmeier, Synexus Clinical Research, Glendale, Arizona; William Biggs, Amarillo Medical Specialists, Amarillo, Texas; William Byars, Mountain View Clinical Research, Greer, South Carolina; William Kirby, Clinical Research Advantage, Birmingham, Alabama; Zeeshan Shaikh, Southwest Clinical Trials, Houston, Texas.

## **eAppendix 2. Trial Product Administration**

Patients were instructed to administer trial products (regardless of assigned treatment group) in the morning, in a fasting state, with  $\leq 120$  mL of water  $\geq 30$  minutes before breakfast and  $\geq 30$  minutes before any other oral medication (including background glucose-lowering medication). Tablets were to be taken whole.

Oral semaglutide and sitagliptin are not visually identical. In order to maintain blinding, patients received two tablets daily; the active drug and a placebo. For both oral semaglutide and sitagliptin, respectively, the active drug and the corresponding placebo tablets were identical with regard to visual appearance, and all oral semaglutide tablets were visually identical to each other, irrespective of dose level.

## eAppendix 3. Description of Patient-Reported Outcomes

### Impact of Weight on Quality of Life-Lite questionnaire Clinical Trial Version

A 23-item version of the Impact of Weight on Quality of Life-Lite questionnaire Clinical Trial Version (IWQOL-Lite-CT) was included in the trial, and all items employ a 5-point graded response scale (never, rarely, sometimes, usually, always; or not at all true, a little true, moderately true, mostly true, completely true). The items were further grouped into the following five domains: Psychosocial, Physical, Physical Function, Pain/Discomfort, and IWQOL-Lite-CT Total. All IWQOL-Lite-CT domain scores range from 0 to 100, with higher scores reflecting better levels of functioning.

### Short Form-36 Version 2 Health Survey (acute version)

Higher scores on all domains and component summary measures indicate better health-related quality of life/general health status. Scores are norm-based, using the 2009 US general population norm, presented below.<sup>1</sup>

| Scale/measure                                               | 2009 US general population norm |         |
|-------------------------------------------------------------|---------------------------------|---------|
|                                                             | Lowest                          | Highest |
| Physical functioning                                        | 19.03                           | 57.60   |
| Role limitations due to physical health (role-physical)     | 21.89                           | 57.12   |
| Bodily pain                                                 | 21.39                           | 60.87   |
| General health perceptions (general health)                 | 21.29                           | 65.40   |
| Vitality                                                    | 25.60                           | 69.15   |
| Social functioning                                          | 17.20                           | 56.74   |
| Role limitations due to emotional problems (role-emotional) | 9.84                            | 55.64   |
| Mental health                                               | 13.12                           | 62.67   |
| Physical component summary                                  | 10.80                           | 75.51   |
| Mental component summary                                    | 5.62                            | 69.65   |

The individual responder threshold values are presented below.<sup>1</sup>

| Domain                                                      | Responder threshold |
|-------------------------------------------------------------|---------------------|
| Physical functioning                                        | 4.3                 |
| Role limitations due to physical health (role-physical)     | 4.0                 |
| Bodily pain                                                 | 5.5                 |
| General health perceptions (general health)                 | 7.0                 |
| Vitality                                                    | 6.7                 |
| Social functioning                                          | 6.2                 |
| Role limitations due to emotional problems (role-emotional) | 4.6                 |
| Mental health                                               | 6.7                 |
| Physical component summary                                  | 3.8                 |
| Mental component summary                                    | 4.6                 |

### Control of Eating Questionnaire

In this trial, a version of the Control of Eating Questionnaire (CoEQ) with 19 items was included. The CoEQ items are scored on an 11-point graded response scale ranging from 10 to 0.

The responder thresholds for CoEQ were defined using a distribution-based approach, half of a standard deviation of the baseline CoEQ item and domain scores per trial was used.<sup>2</sup> The thresholds were derived from baseline CoEQ data across the oral semaglutide groups (3, 7, and 14 mg) and sitagliptin 100 mg group.

The individual responder thresholds used in this trial calculated using the above approach are presented below.

| <b>Domain</b>       | <b>Responder threshold for PIONEER 3</b> |
|---------------------|------------------------------------------|
| Craving control     | 1.2                                      |
| Positive mood       | 0.9                                      |
| Craving for sweet   | 1.2                                      |
| Craving for savoury | 1.1                                      |

## eAppendix 4. Estimands

According to draft International Council of Harmonisation (ICH) E9 (R1)<sup>3</sup> an estimand description consists of four components: 1) population, 2) endpoint, 3) intercurrent events and how they are accounted for and 4) population level summary. In the table below, the four attributes are described for the estimands in PIONEER 3. Two intercurrent events were considered: trial product discontinuation and initiation of rescue medication/additional glucose-lowering medication.

### The attributes of the two estimands according to draft ICH E9 (R1)<sup>3</sup>

| Estimand                  | Population              | Strategy for accounting for intercurrent events                                                                                                | Endpoints                                                                                                                                                                                                                                                                                                                                                                         | Population level summary                             |
|---------------------------|-------------------------|------------------------------------------------------------------------------------------------------------------------------------------------|-----------------------------------------------------------------------------------------------------------------------------------------------------------------------------------------------------------------------------------------------------------------------------------------------------------------------------------------------------------------------------------|------------------------------------------------------|
| Treatment policy estimand | All randomized patients | Treatment policy: <ul style="list-style-type: none"> <li>• Trial product discontinuation</li> <li>• Initiation of rescue medication</li> </ul> | Change from baseline to weeks 26, 52 and 78 in <ul style="list-style-type: none"> <li>• HbA<sub>1c</sub><sup>a</sup></li> <li>• Body weight (kg)<sup>a</sup></li> <li>• Fasting plasma glucose</li> <li>• SMBG<sup>b</sup></li> <li>• BMI</li> <li>• Waist circumference</li> <li>• IWQoL-Lite-CT score</li> <li>• SF-36v2 (acute version) score</li> <li>• CoEQ score</li> </ul> | Mean difference between treatments                   |
|                           |                         |                                                                                                                                                | Change from baseline to weeks 26, 52 and 78 in <ul style="list-style-type: none"> <li>• Total cholesterol</li> <li>• Low-density lipoprotein cholesterol</li> <li>• Very low-density lipoprotein cholesterol</li> <li>• High-density lipoprotein cholesterol</li> <li>• Triglycerides</li> </ul>                                                                                  | The geometric mean ratio between treatments          |
|                           |                         |                                                                                                                                                | If a patient at weeks 26, 52 and 78 achieves: <ul style="list-style-type: none"> <li>• HbA<sub>1c</sub> &lt;7.0%</li> <li>• HbA<sub>1c</sub> ≤6.5%</li> <li>• Body weight loss ≥5%</li> <li>• Body weight loss ≥10%</li> <li>• Composite: HbA<sub>1c</sub> &lt;7.0% without hypoglycemia and no weight gain</li> </ul>                                                            | The odds ratio between treatments in reaching target |



| Estimand               | Population              | Strategy for accounting for intercurrent events                                                                                            | Endpoints                                                                                                                                                                                                                                                                                                                                                                                                                                                                                                                    | Population level summary                             |
|------------------------|-------------------------|--------------------------------------------------------------------------------------------------------------------------------------------|------------------------------------------------------------------------------------------------------------------------------------------------------------------------------------------------------------------------------------------------------------------------------------------------------------------------------------------------------------------------------------------------------------------------------------------------------------------------------------------------------------------------------|------------------------------------------------------|
|                        |                         |                                                                                                                                            | <ul style="list-style-type: none"> <li>• Composite: HbA<sub>1c</sub> reduction <math>\geq 1\%</math> and body weight loss <math>\geq 3\%</math></li> </ul>                                                                                                                                                                                                                                                                                                                                                                   |                                                      |
| Trial product estimand | All randomized patients | Hypothetical: <ul style="list-style-type: none"> <li>• Trial product discontinuation</li> <li>• Initiation of rescue medication</li> </ul> | Change from baseline to weeks 26, 52 and 78 in <ul style="list-style-type: none"> <li>• HbA<sub>1c</sub></li> <li>• Body weight (kg)</li> <li>• Fasting plasma glucose</li> <li>• SMBG<sup>b</sup></li> <li>• BMI</li> <li>• Waist circumference</li> <li>• IWQoL-Lite-CT score</li> <li>• SF-36v2 (acute version) score</li> <li>• CoEQ score</li> </ul>                                                                                                                                                                    | Mean difference between treatments                   |
|                        |                         |                                                                                                                                            | Change from baseline to weeks 26, 52 and 78 in <ul style="list-style-type: none"> <li>• Total cholesterol</li> <li>• Low-density lipoprotein cholesterol</li> <li>• Very low-density lipoprotein cholesterol</li> <li>• High-density lipoprotein cholesterol</li> <li>• Triglycerides</li> </ul>                                                                                                                                                                                                                             | The geometric mean ratio between treatments          |
|                        |                         |                                                                                                                                            | If a patient at weeks 26, 52 and 78 achieves: <ul style="list-style-type: none"> <li>• HbA<sub>1c</sub> <math>&lt; 7.0\%</math></li> <li>• HbA<sub>1c</sub> <math>\leq 6.5\%</math></li> <li>• Body weight loss <math>\geq 5\%</math></li> <li>• Body weight loss <math>\geq 10\%</math></li> <li>• Composite: HbA<sub>1c</sub> <math>&lt; 7.0\%</math> without hypoglycemia and no weight gain</li> <li>• Composite: HbA<sub>1c</sub> reduction <math>\geq 1\%</math> and body weight loss <math>\geq 3\%</math></li> </ul> | The odds ratio between treatments in reaching target |

| <b>Estimand</b>                       | <b>Population</b>       | <b>Strategy for accounting for intercurrent events</b>                                                                                                                                                                        | <b>Endpoints</b>                                                                                   | <b>Population level summary</b>     |
|---------------------------------------|-------------------------|-------------------------------------------------------------------------------------------------------------------------------------------------------------------------------------------------------------------------------|----------------------------------------------------------------------------------------------------|-------------------------------------|
| Treatment policy estimand / composite | All randomized patients | Treatment policy:<br><ul style="list-style-type: none"> <li>• Trial product discontinuation</li> </ul> Composite:<br><ul style="list-style-type: none"> <li>• Initiation of additional glucose-lowering medication</li> </ul> | <ul style="list-style-type: none"> <li>• Time to additional glucose-lowering medication</li> </ul> | The hazard ratio between treatments |
| Trial product estimand / composite    | All exposed patients    | Hypothetical:<br><ul style="list-style-type: none"> <li>• Trial product discontinuation</li> </ul> Composite:<br><ul style="list-style-type: none"> <li>• Initiation of rescue medication</li> </ul>                          | <ul style="list-style-type: none"> <li>• Time to rescue medication</li> </ul>                      | The hazard ratio between treatments |

Abbreviation: BMI, body mass index; CoEQ, Control of Eating Questionnaire; IWQoL-Lite-CT, Impact of Weight on Quality of Life-Lite questionnaire Clinical Trial Version; SF-36v2, Short Form-36 version 2 health survey; SMBG, self-monitored blood glucose.

<sup>a</sup> Confirmatory endpoint at week 26.

<sup>b</sup> Self-monitored blood glucose is reported as plasma equivalent values of capillary whole blood glucose.

## eAppendix 5. Statistical Considerations

The confirmation of efficacy of oral semaglutide on change in HbA<sub>1c</sub> and in body weight, both from baseline to week 26, was based on a weighted Bonferroni closed testing strategy<sup>4</sup> to control the overall type 1 error for the hypotheses evaluated by the treatment policy estimand. The testing strategy was based on two principles. 1) Within a dose level, non-inferiority with respect to HbA<sub>1c</sub> had to be confirmed before testing for superiority with respect to HbA<sub>1c</sub> or to body weight. 2) Non-inferiority with respect to HbA<sub>1c</sub> had to be confirmed on all higher dose levels before continuing testing hypotheses on lower dose levels.

A sample size of 465 patients per treatment group was calculated to provide 90% power to jointly confirm the superiority of oral semaglutide 14 and 7 mg versus sitagliptin 100 mg, and non-inferiority of oral semaglutide 3 mg versus sitagliptin in reducing HbA<sub>1c</sub> at week 26. The sample size was determined assuming treatment effects of -0.5%, -0.3%, and -0.1% for HbA<sub>1c</sub> and -3.0 kg, -2.0 kg, and -1.0 kg for body weight for the 14, 7, and 3 mg dose, respectively, all versus sitagliptin and with common standard deviations of 1.1% for change from baseline in HbA<sub>1c</sub> and 4.0 kg for change from baseline in body weight. 20% of patients were assumed to have discontinued trial product or initiated rescue medication, and a 75% reduced treatment effect was assumed for these patients.

### Graphical illustration of the closed testing procedure.

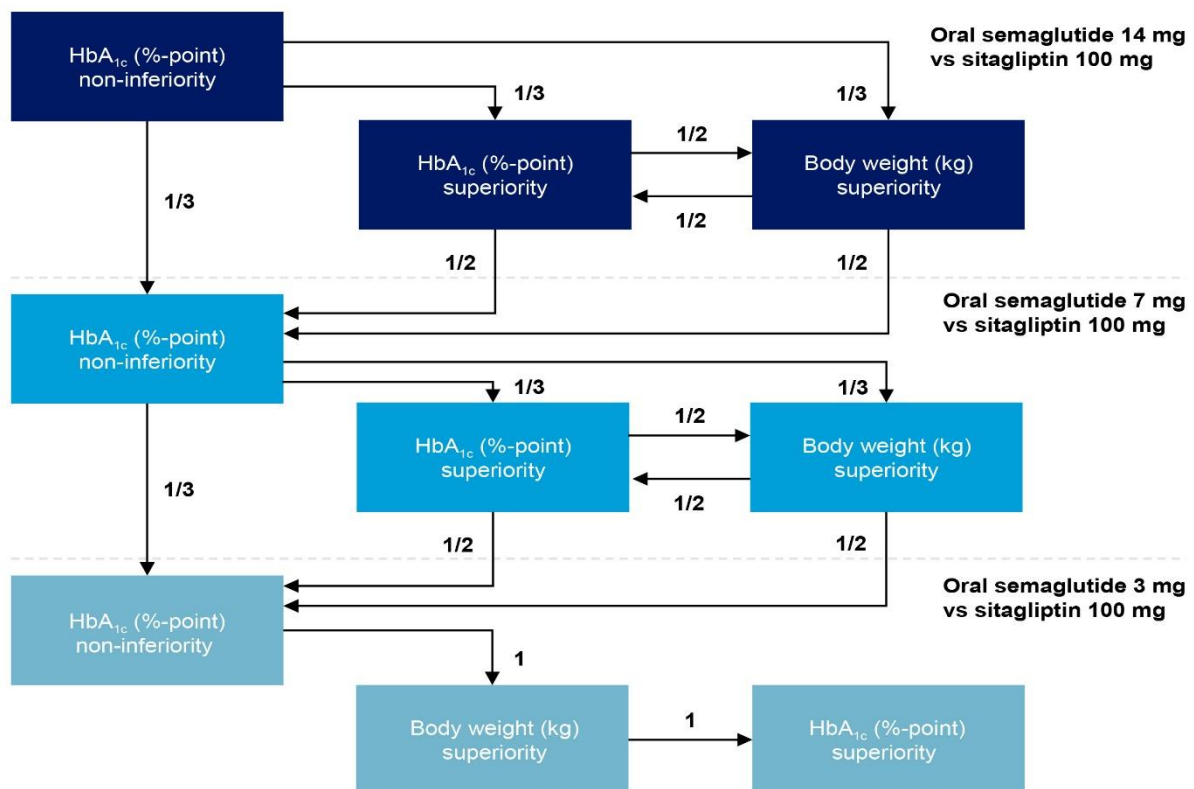

Initially the overall two-sided significance level of  $\alpha=5\%$  was allocated to the first hypothesis of non-inferiority with respect to HbA<sub>1c</sub> for the 14 mg dose. If confirmed, the  $\alpha$ -level was split and propagated to the next hypotheses according to the weights and direction given at the edges between the hypotheses. E.g. if non-inferiority of 14 mg was confirmed the full  $\alpha$ -level of 5% was split and assigned evenly to superiority of HbA<sub>1c</sub> and superiority of body weight for the 14 mg dose and non-inferiority of HbA<sub>1c</sub> for the 7 mg dose allowing any of the three hypotheses to be tested at a significance level of  $\alpha/3$ . The procedure continued until no more hypotheses could be confirmed. A hypothesis was considered confirmed if the two-sided p-value was below the significance level and the point estimate favored oral semaglutide (the alternative hypothesis); equivalent to a one-sided test at half the significance level.

The treatment policy estimand was estimated by a pattern mixture model using multiple imputation to handle missing data at week 26 for all continuous endpoints. All data collected at week 26 irrespective of discontinuation of trial product or initiation of rescue medication were included in the statistical analysis. Imputation of missing data at week 26 was done within groups defined by randomized treatment and treatment status at week 26 hereby assuming that the likely values of the missing data are best described by observed responses from patients with the same randomized treatment and treatment status. Imputation of missing data at weeks 52 and 78 was done within groups defined by randomized treatment, treatment status at week 26 and at week 52 or 78. The imputation model was an analysis of covariance (ANCOVA) with region and background

medication as factors and baseline value as covariate. One thousand complete data sets were generated and analyzed separately by an ANCOVA with treatment, region and background medication as factors and baseline value as covariate. The estimated means and variances were combined by use of Rubin's rule<sup>5</sup> to draw inference. Prior to testing for non-inferiority, a value of 0.3% (the non-inferiority margin) was added to imputed values at week 26 for the oral semaglutide treatment group. This was done to ensure imputation of missing values would not increase the likelihood of demonstrating non-inferiority.<sup>6</sup>

The trial product estimand was estimated by a mixed model for repeated measurements. A restricted maximum likelihood was used. The model included all post-baseline measurements collected at scheduled visits up to and including week 78 from the on-treatment without rescue observation period for all randomized patients as dependent variable. The independent effects included in the model were treatment, region and background medication as categorical fixed effects and baseline value as a covariate, all nested within visit. An unstructured covariance matrix for endpoint measurements within the same patient was employed. For patients who did not have post-baseline assessments for planned visits available in the on-treatment without rescue medication period, the baseline value was carried forward (8 weeks at most) to the first planned visit to ensure that all randomized patients contributed to the statistical analysis. For the analyses of change in HbA<sub>1c</sub> and body weight at week 26 the model included all post-baseline measurements collected at scheduled visits up to and including week 26 only.

Three sensitivity analyses were pre-specified for the main analysis of the treatment policy estimand:

- A comparator multiple imputation analysis where missing data in the oral semaglutide groups were imputed based on the distribution of the week 26 values in the sitagliptin group.
- Adverse event determined comparator multiple imputation analysis. Missing data as a result of trial product discontinuation because of adverse events were imputed from the sitagliptin group as described above and the remaining missing data were imputed as in the main analysis.
- A tipping point analysis where a penalty was added to the imputed values in the oral semaglutide group. The penalty was increased until the conclusions from the main analyses were reversed. The specific value of the penalty that reversed the conclusion was used to evaluate the robustness of the main analysis results.

Supportive binary endpoints were analyzed by a generalized linear model with binomial distribution and identity link function. The model included treatment and background medication as factors. The model was specified post hoc. For the treatment policy estimand, missing data were imputed similarly as for the continuous endpoints, whereas missing data for the trial product estimand were imputed from patients randomized to same trial product using a sequential multiple imputation method. Missing data for the hypoglycemia component of the composite endpoint, HbA<sub>1c</sub> <7.0% without hypoglycemia and no weight gain, was imputed based on a Bayesian log-linear negative binomial model fitted to the observed data.<sup>7</sup>

The secondary endpoints time to additional glucose-lowering medication and time to rescue medication were analyzed by a Cox proportional hazards model with treatment, region and background medication as factors, and baseline HbA<sub>1c</sub> as a covariate. Time to additional glucose-lowering medication was defined as the time from randomization to initiation of new glucose-lowering medication or intensification of background glucose-lowering medication, both lasting for more than 21 days and with the initiation/intensification occurring at or after randomization and before planned end-of-treatment. Intensification was defined as more than 20% increase in dose relative to baseline. Patients withdrawn or lost to follow-up were considered as having an event on the day of withdrawal, and patients without an event were censored the day before the end-of-treatment visit. Time to rescue medication was defined as the time from first dose of trial product to initiation of rescue medication. Rescue medication was defined as the subset of additional glucose-lowering medication initiated before last date on trial product, and potential events occurring between randomization and first dose of trial product were considered as events occurring on day 0. Patients without an event were censored the day before last date on trial product.

All analyses were performed using SAS Version 9.4M2.

**eFigure 1. Trial Design**

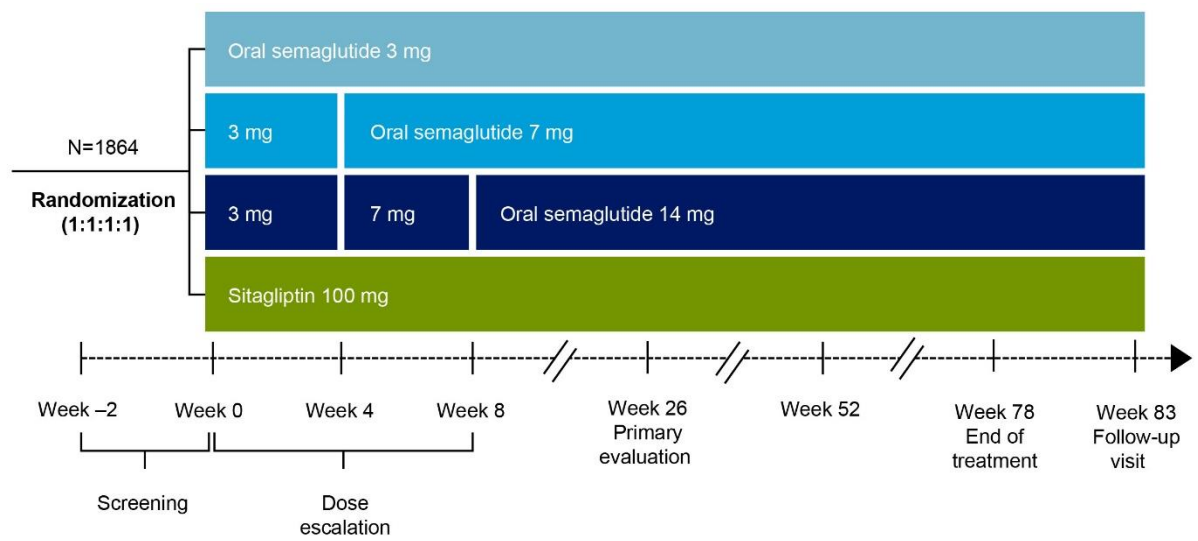

All patients randomized to oral semaglutide initiated treatment with 3 mg once daily and followed a fixed 4-week dose-escalation regimen until reaching the randomized dose.

## eFigure 2. Boxplots of Observed HbA<sub>1c</sub> and Body Weight Over Time

### A1. HbA<sub>1c</sub> – treatment policy estimand

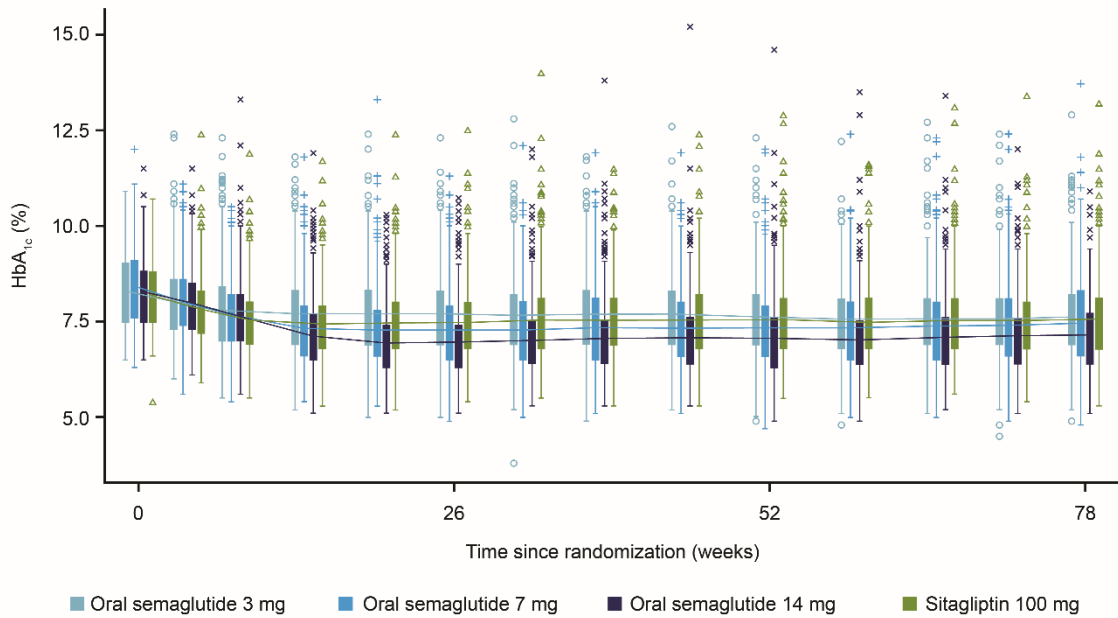

### A2. Body weight – treatment policy estimand

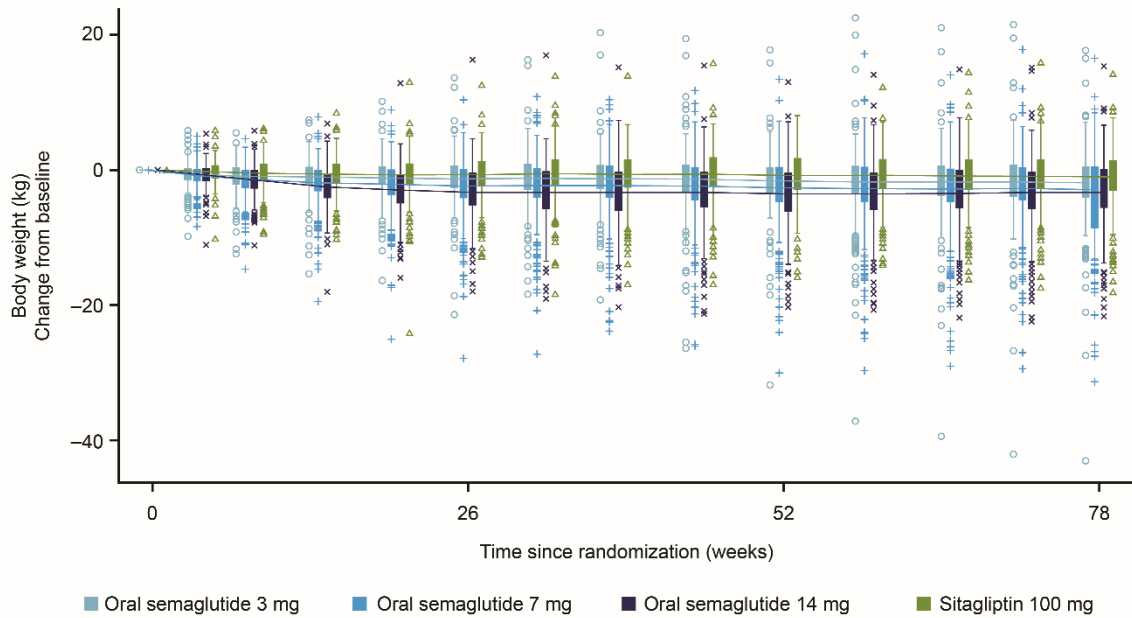

### B1. HbA<sub>1c</sub> – trial product estimand

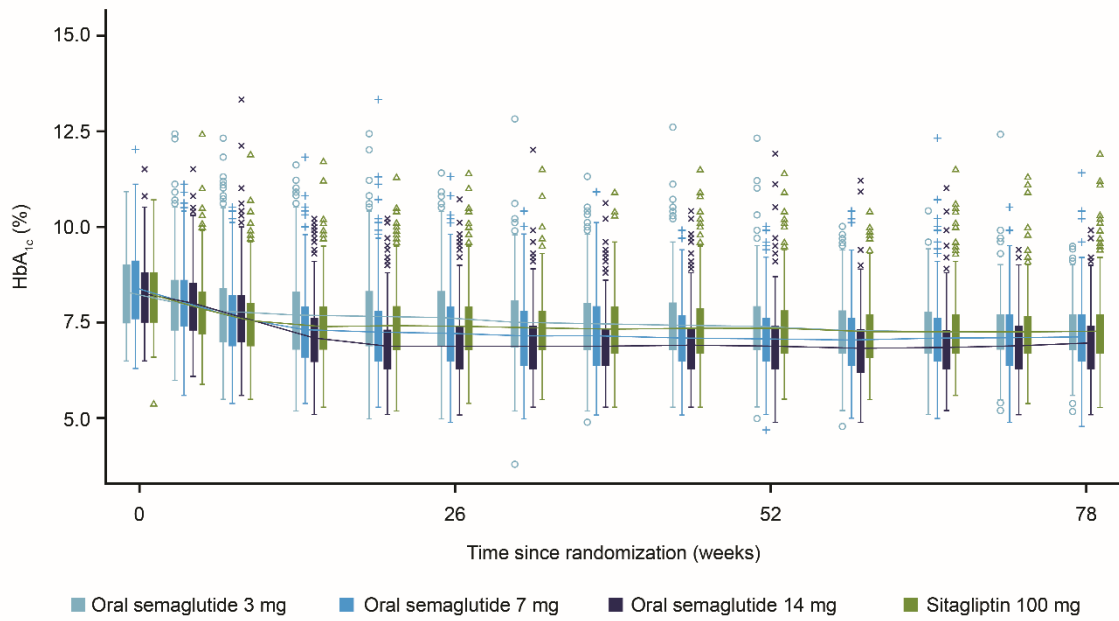

### B2. Body weight – trial product estimand

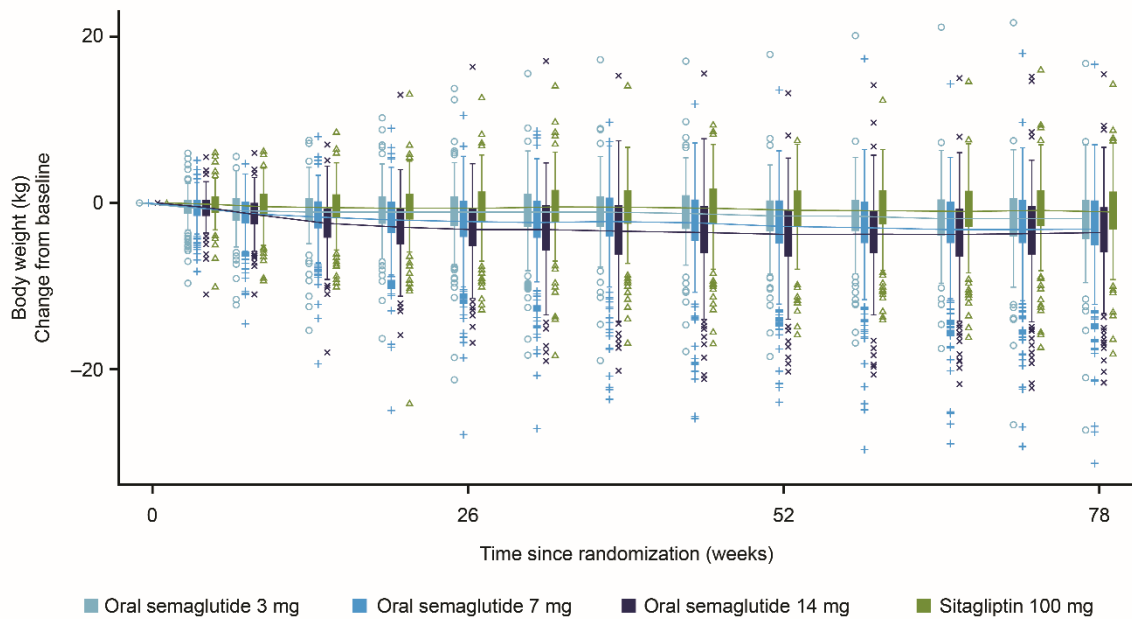

Observed mean over time overlaid with boxplot. The bottom and top edges of the box indicate the intra-quartile range (IQR). The whiskers that extend from each box indicate the range of values that are outside of the IQR but less than 1.5\*IQR. Any points that are a distance of more than 1.5\*IQR from the box are indicated by markers.

Treatment policy estimand: Observed data irrespective of discontinuation of trial product or initiation of rescue medication.

Trial product estimand: Observed data collected prior to discontinuation of trial product or initiation of rescue medication.

### eFigure 3. Sensitivity Analyses for Changes From Baseline in HbA<sub>1c</sub> and Body Weight at Week 26 for the Treatment Policy Estimand

Oral semaglutide vs sitagliptin 100 mg at week 26

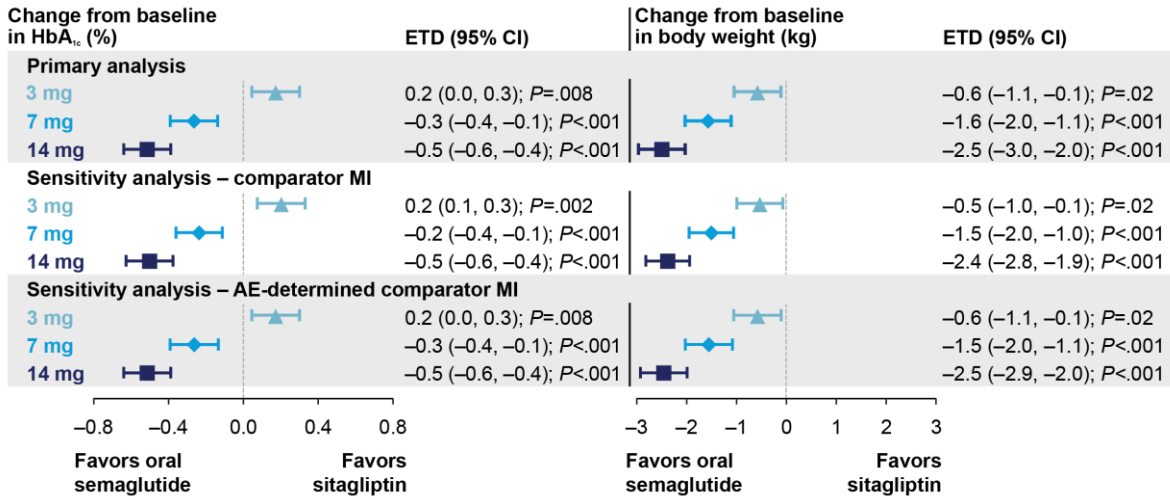

Abbreviation: AE, adverse event; CI, confidence interval; ETD, estimated treatment difference; MI, multiple imputation.

*P* values are unadjusted two-sided *P* values for the test of no difference.



**eFigure 4. Distributions of HbA<sub>1c</sub> and Fasting Plasma Glucose Values at Baseline and Weeks, 26, 52 and 78**

**A1. HbA<sub>1c</sub> – treatment policy estimand**

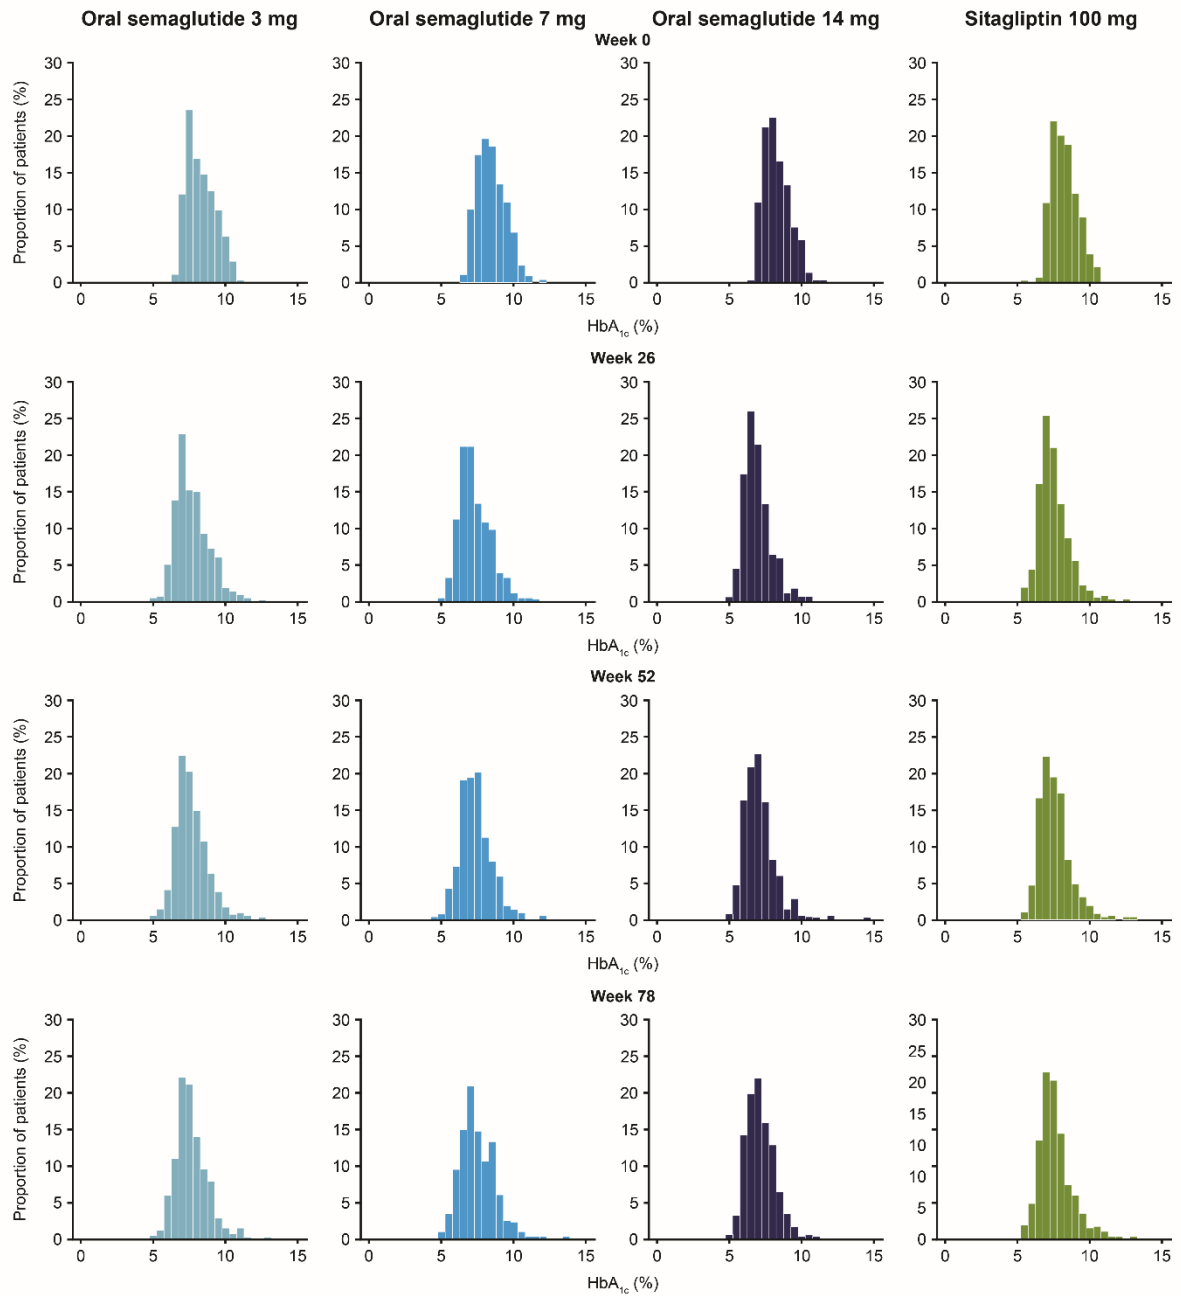

**A2. Fasting plasma glucose – treatment policy estimand**

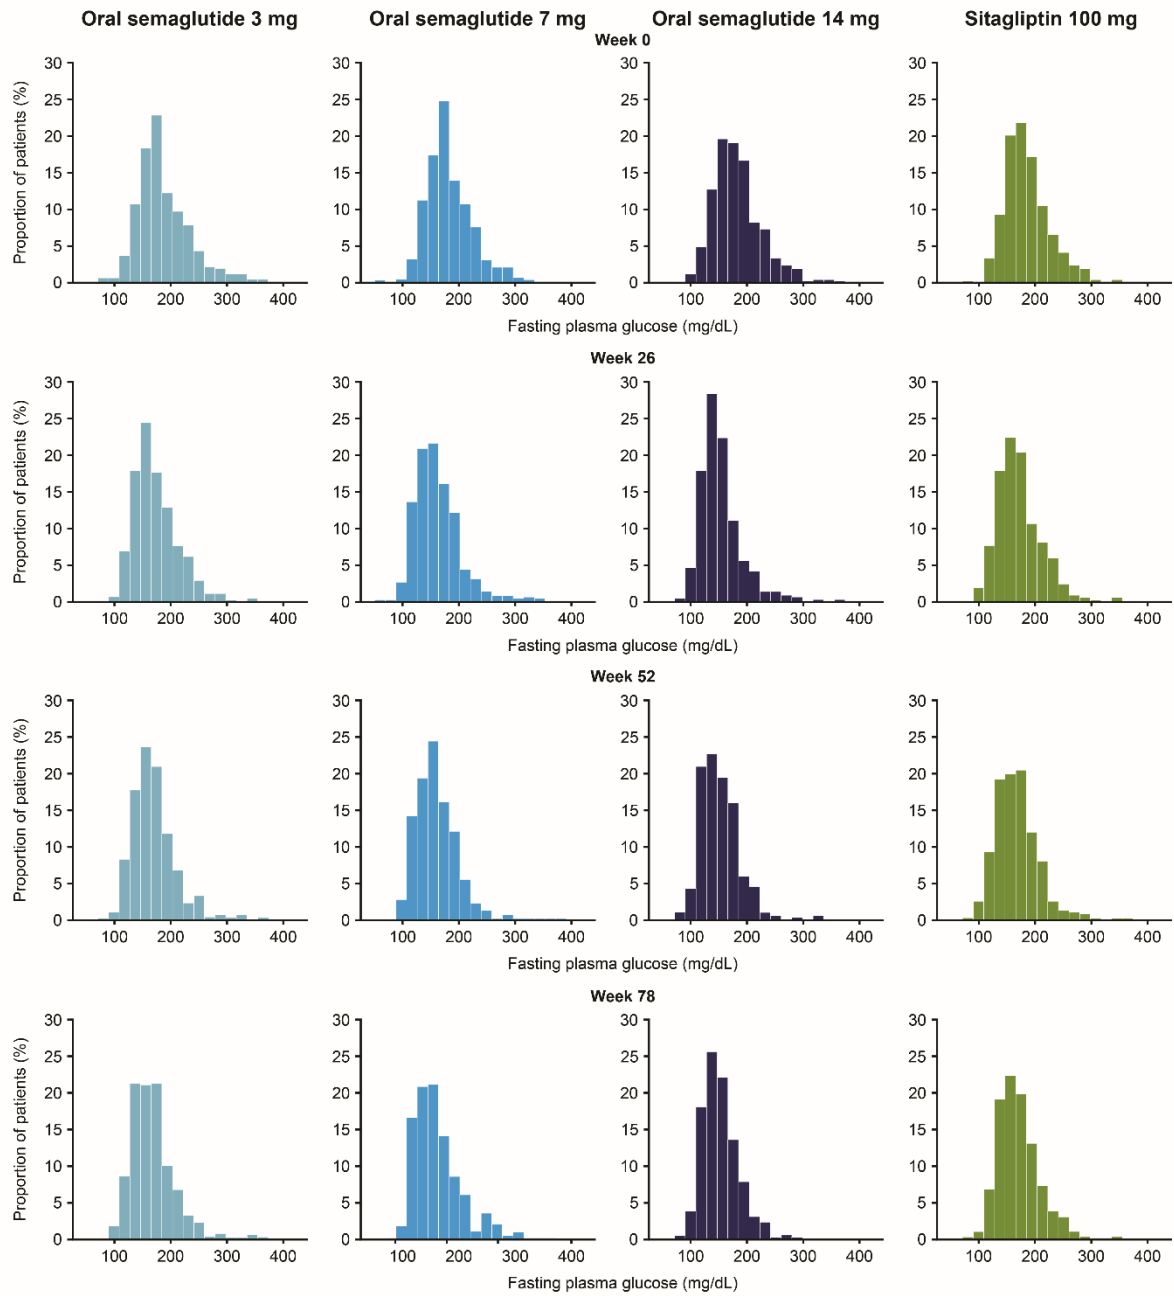

**B1, HbA<sub>1c</sub> – trial product estimand**

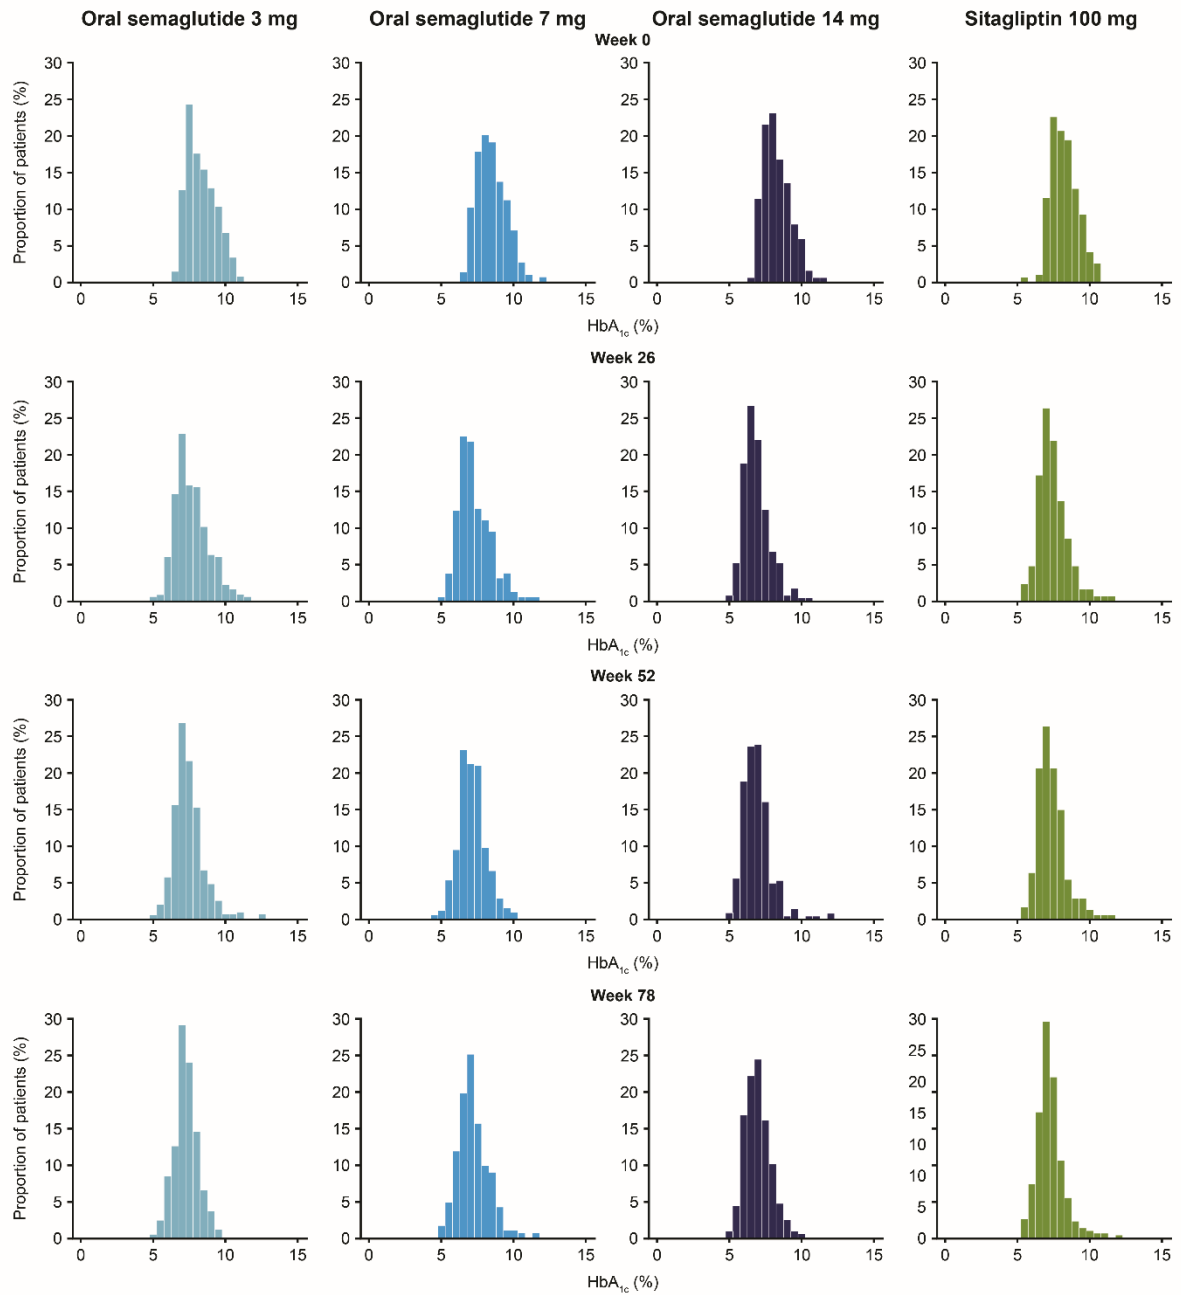

## B2. Fasting plasma glucose – trial product estimand

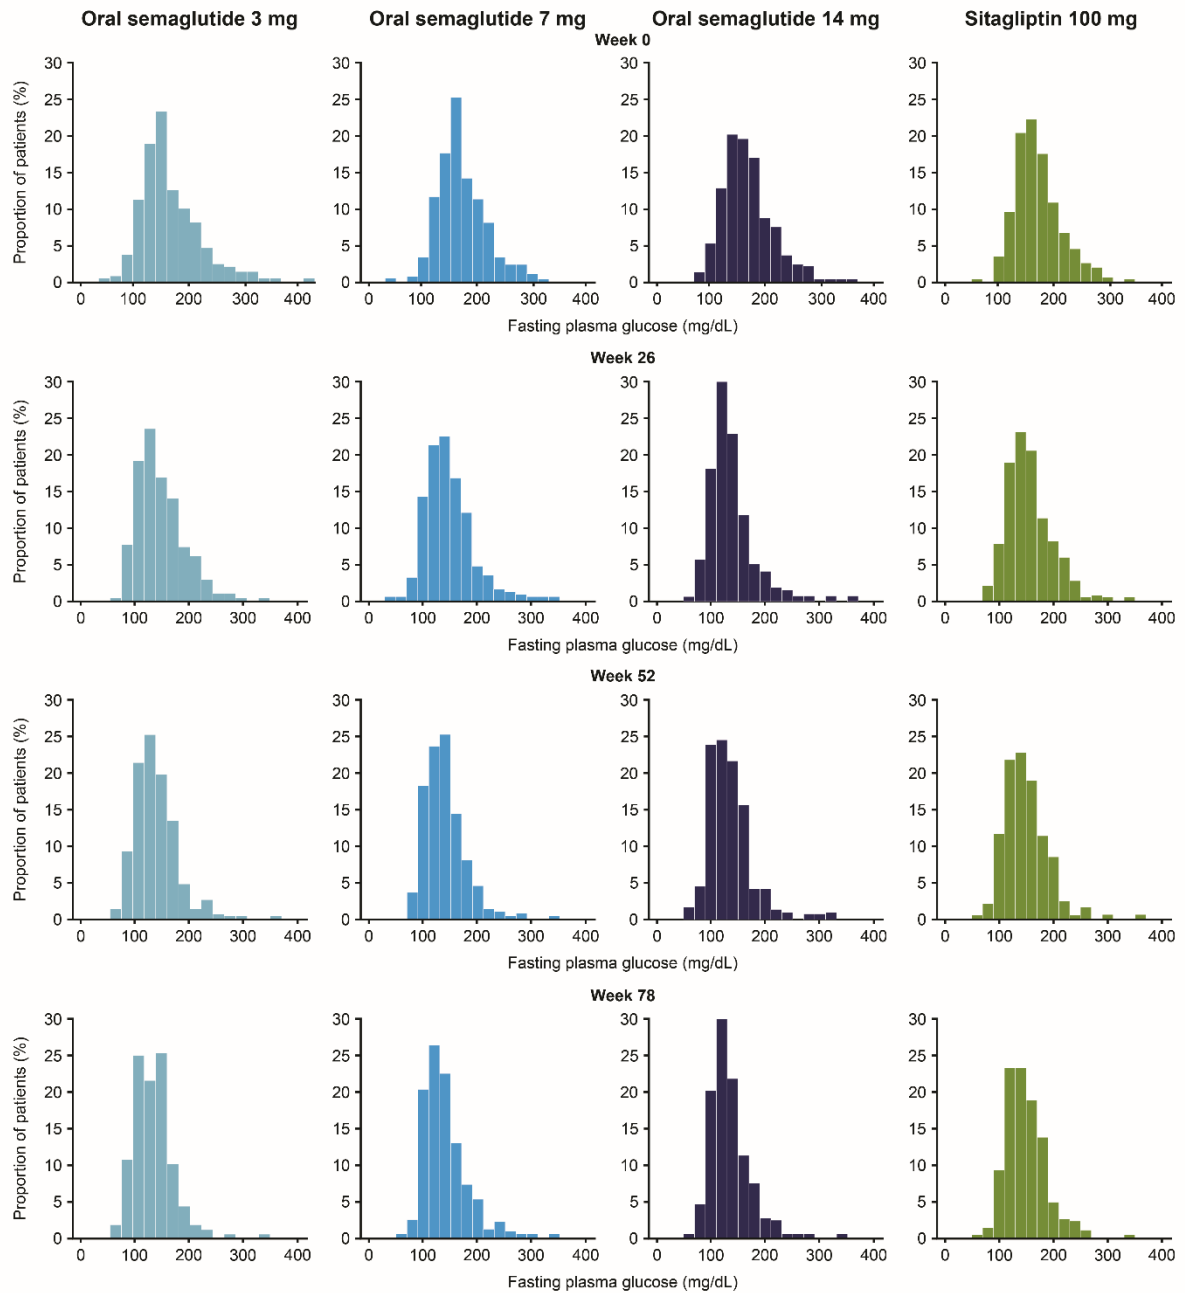

Treatment policy estimand: Observed data irrespective of discontinuation of trial product or initiation of rescue medication.

Trial product estimand: Observed data collected prior to discontinuation of trial product or initiation of rescue medication.

**eFigure 5. Change From Baseline in Impact of Weight on Quality of Life-Lite Clinical Trial Version Questionnaire Scores**

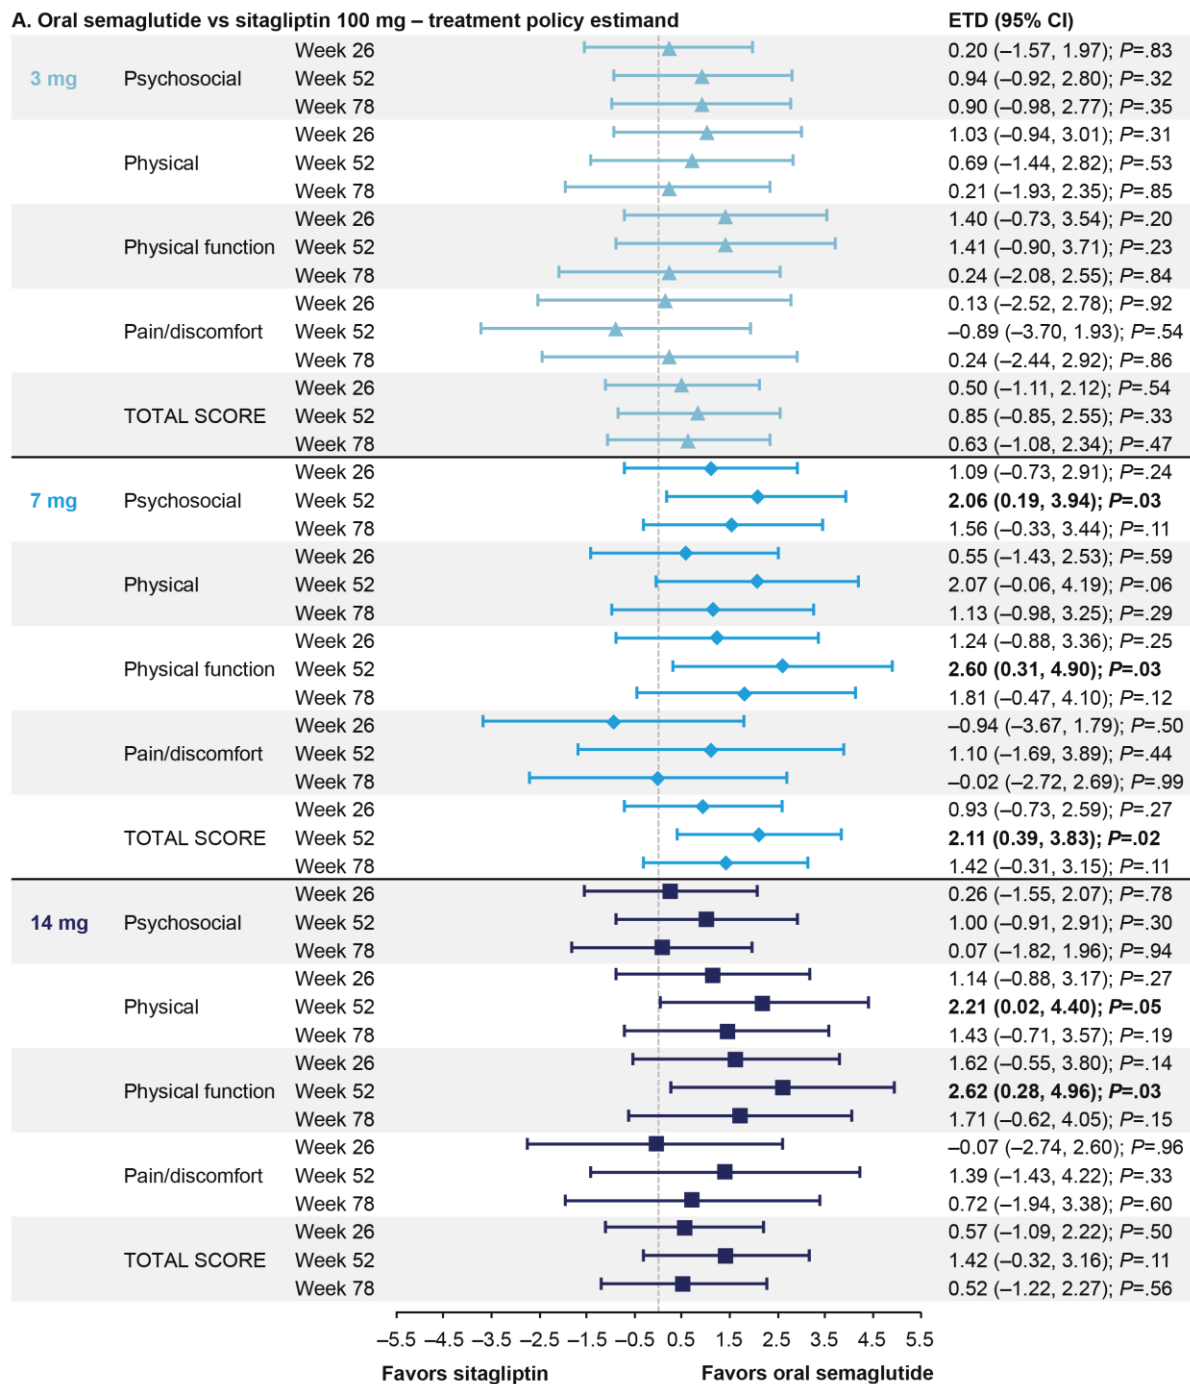

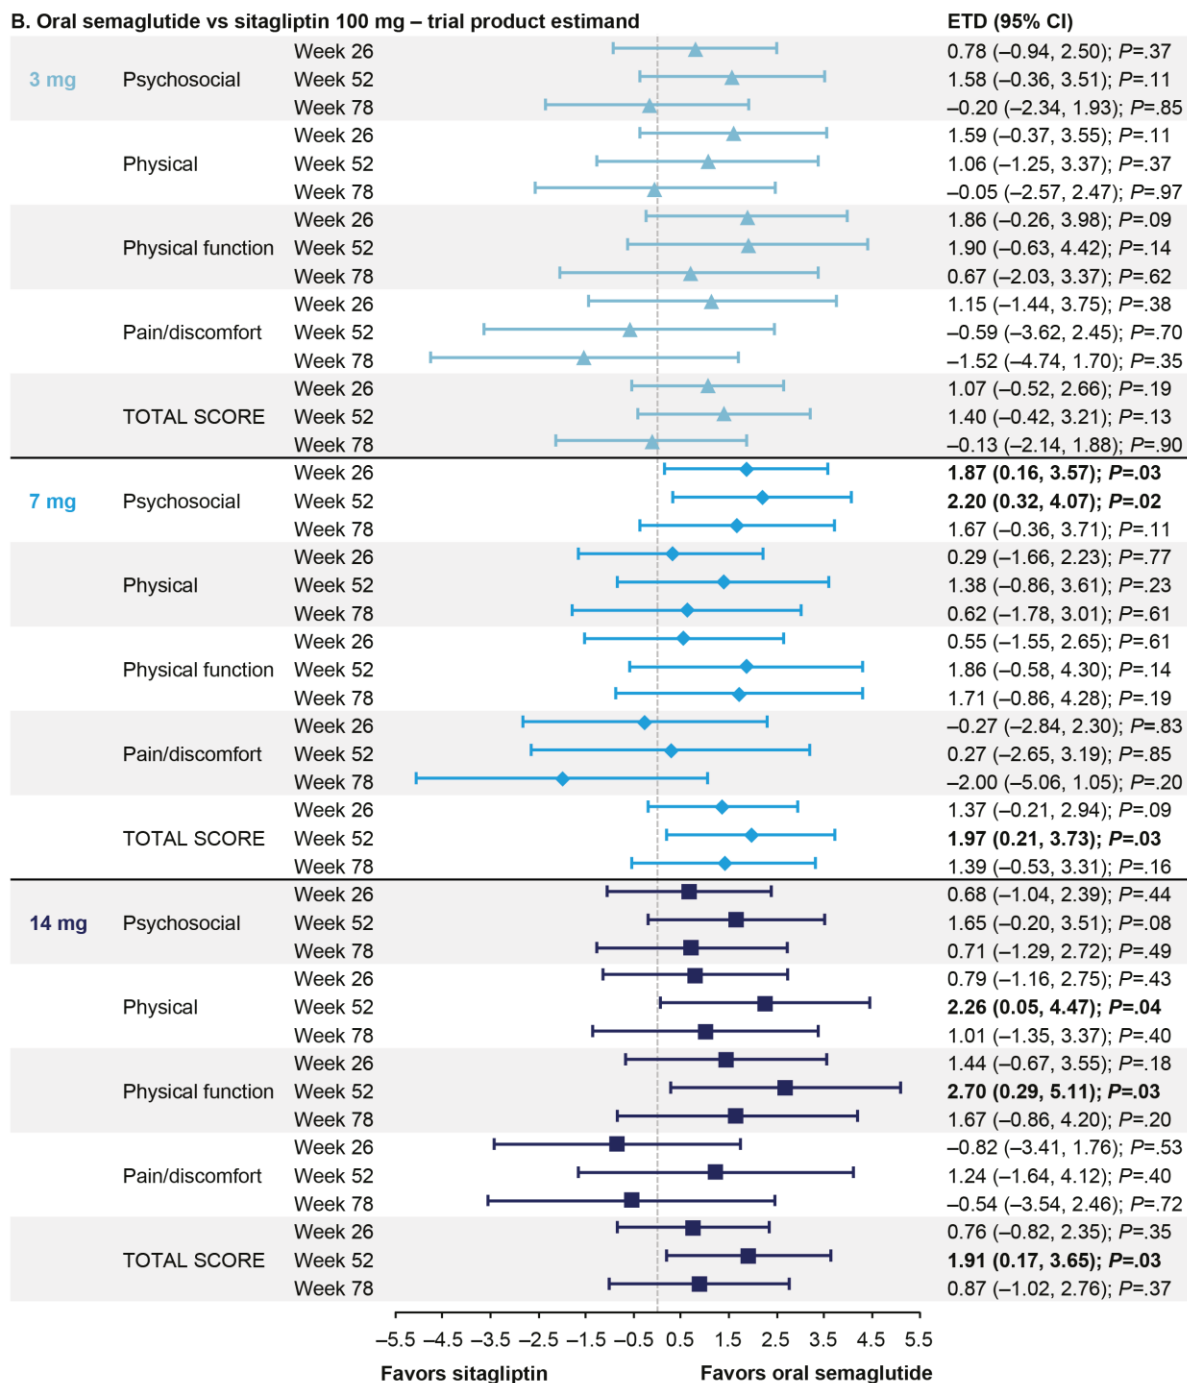

Abbreviation: CI, confidence interval; ETD, estimated treatment difference.

*P* values are unadjusted two-sided *P* values for the test of no difference.

Treatment policy estimand: Analysis of covariance using data irrespective of discontinuation of trial product or initiation of rescue medication. Missing values were imputed by a pattern mixture model using multiple imputation. Pattern was defined by randomized trial product and treatment status (premature trial product discontinuation and/or initiation of rescue medication).

Trial product estimand: Mixed model for repeated measurements. Data collected after discontinuation of trial product or initiation of rescue medication were excluded.

**eFigure 6. Change From Baseline in Short Form-36 Version 2 (Acute Version) Health Survey Summary Scores**

**A. Oral semaglutide vs sitagliptin 100 mg – treatment policy estimand**

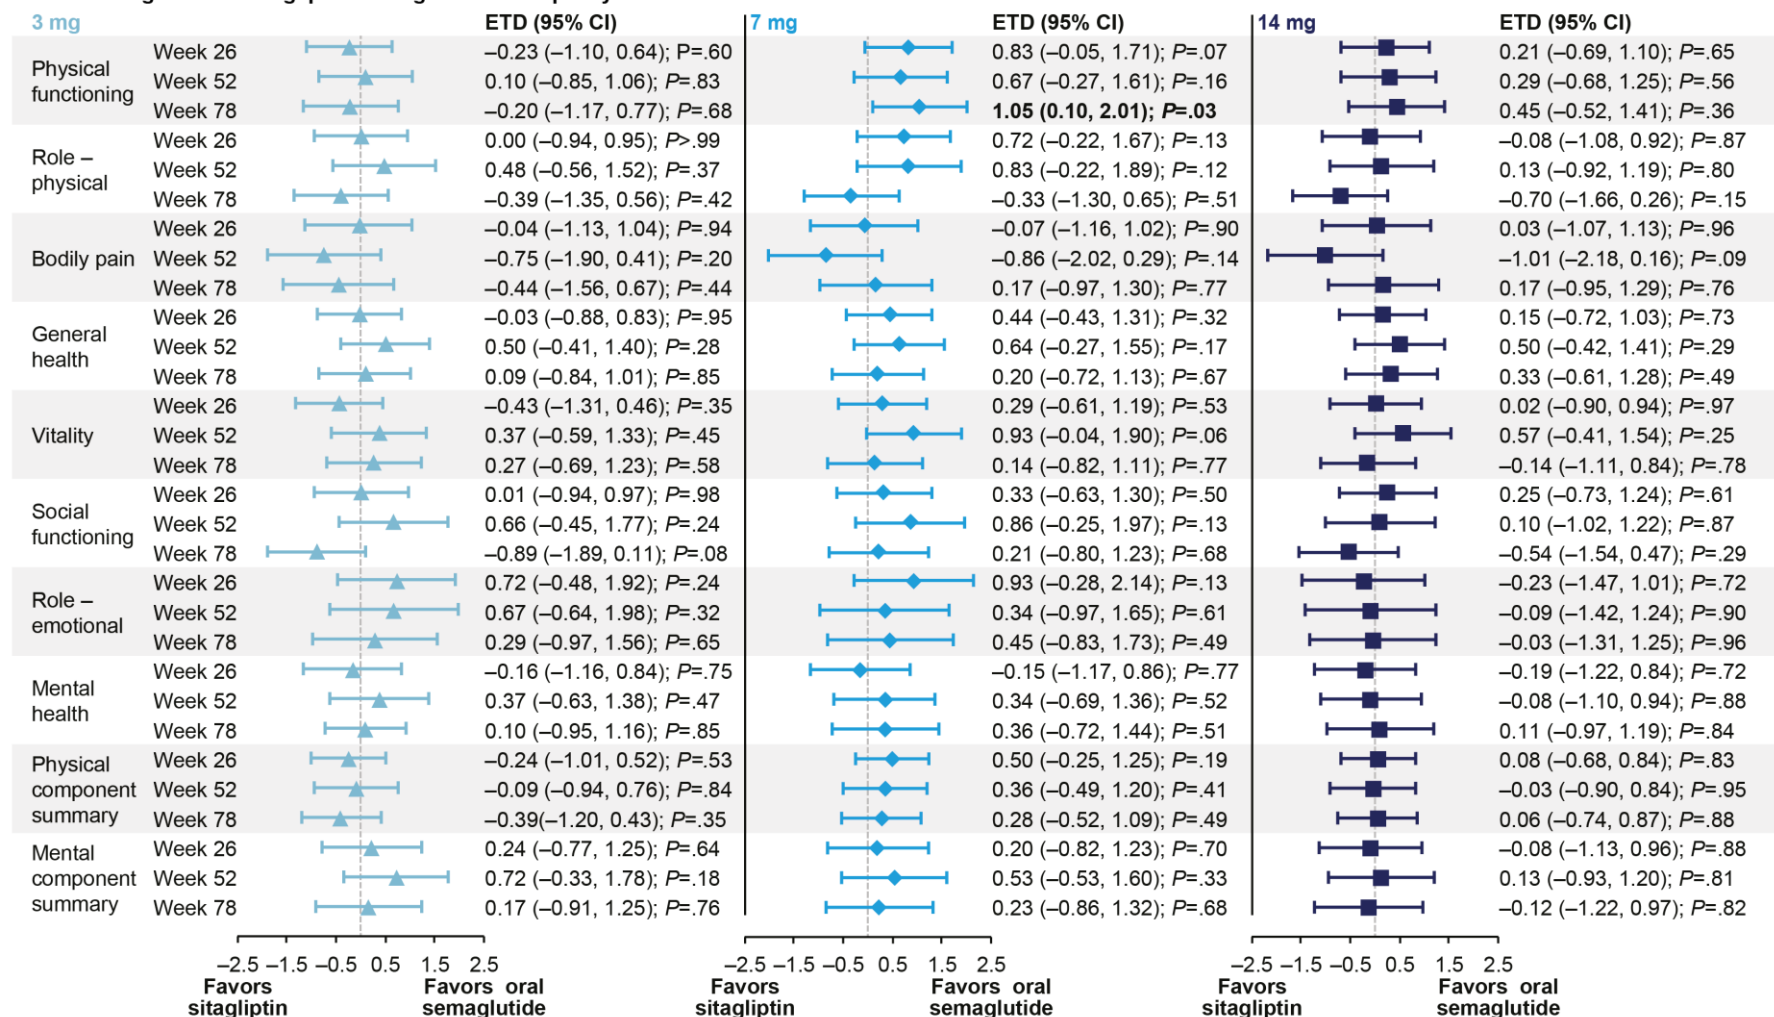

**B. Oral semaglutide vs sitagliptin 100 mg – trial product estimand**

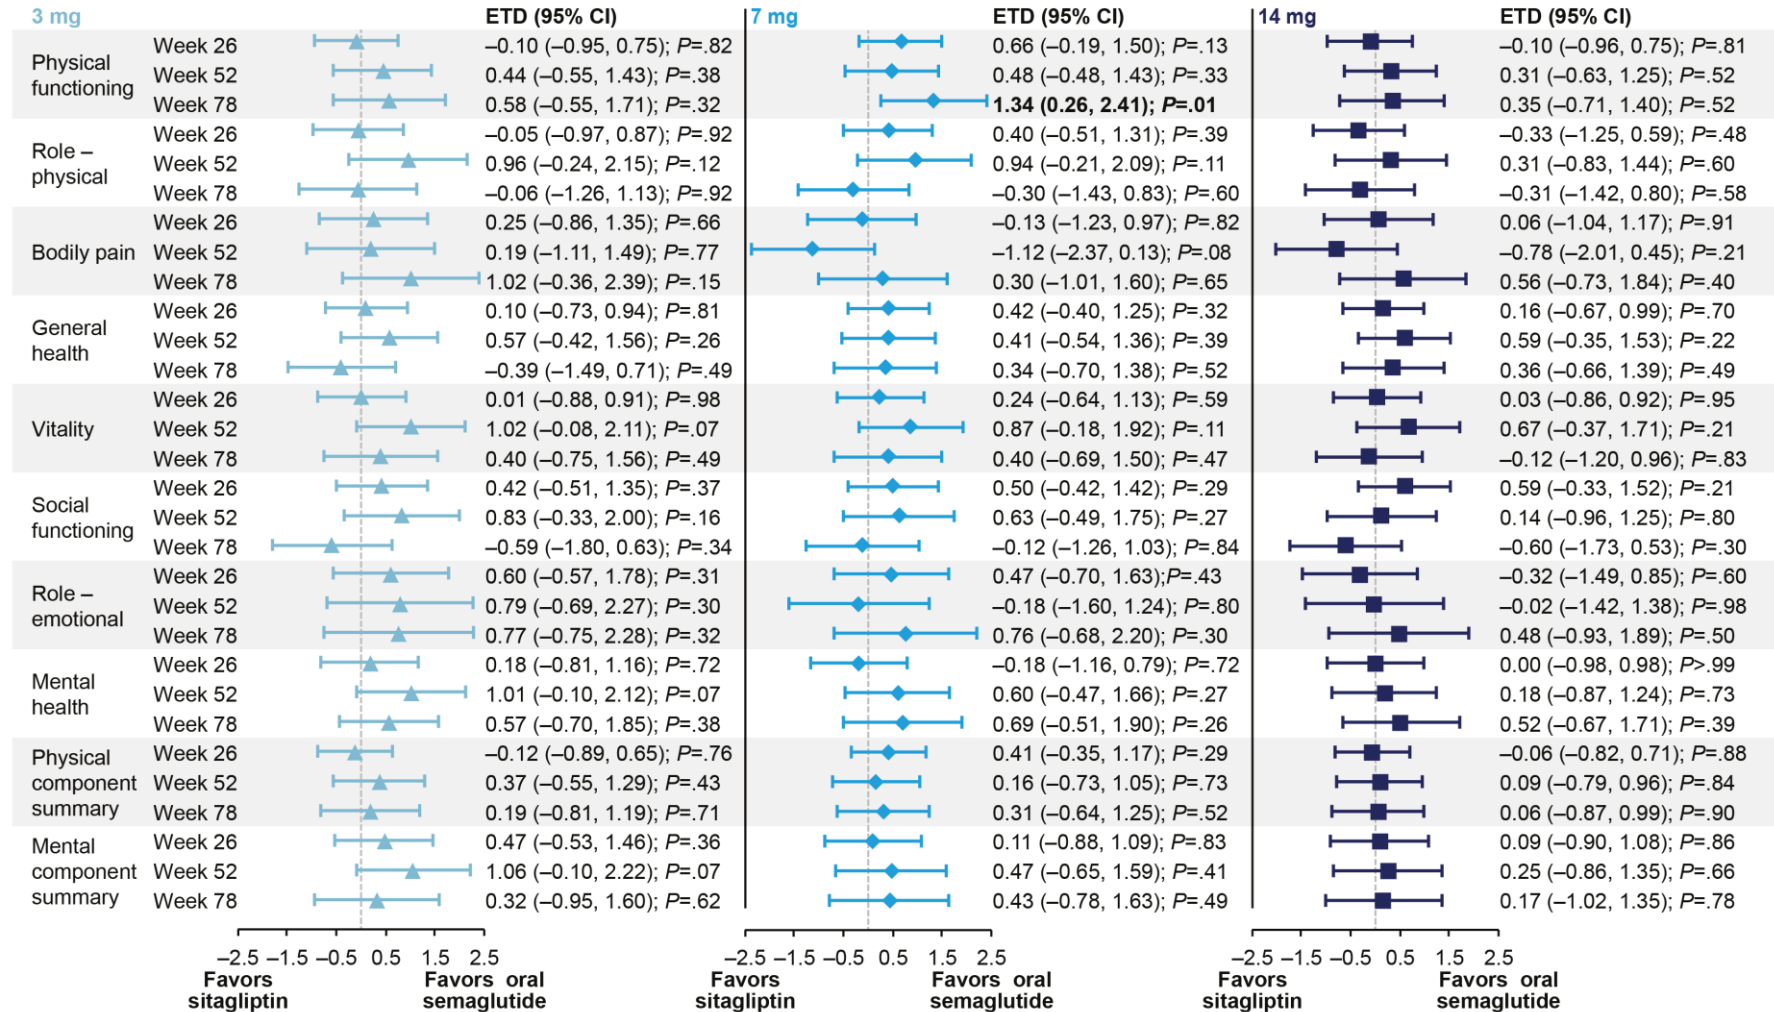

Abbreviation: CI, confidence interval; ETD, estimated treatment difference. P values are unadjusted two-sided P values for the test of no difference.

Treatment policy estimand: Analysis of covariance using data irrespective of discontinuation of trial product or initiation of rescue medication. Missing values were imputed by a pattern mixture model using multiple imputation. Pattern was defined by randomized trial product and treatment status (premature trial product discontinuation and/or initiation of rescue medication).

Trial product estimand: Mixed model for repeated measurements. Data collected after discontinuation of trial product or initiation of rescue medication were excluded.



## eFigure 7. Change From Baseline in Control of Eating Questionnaire Domain Scores

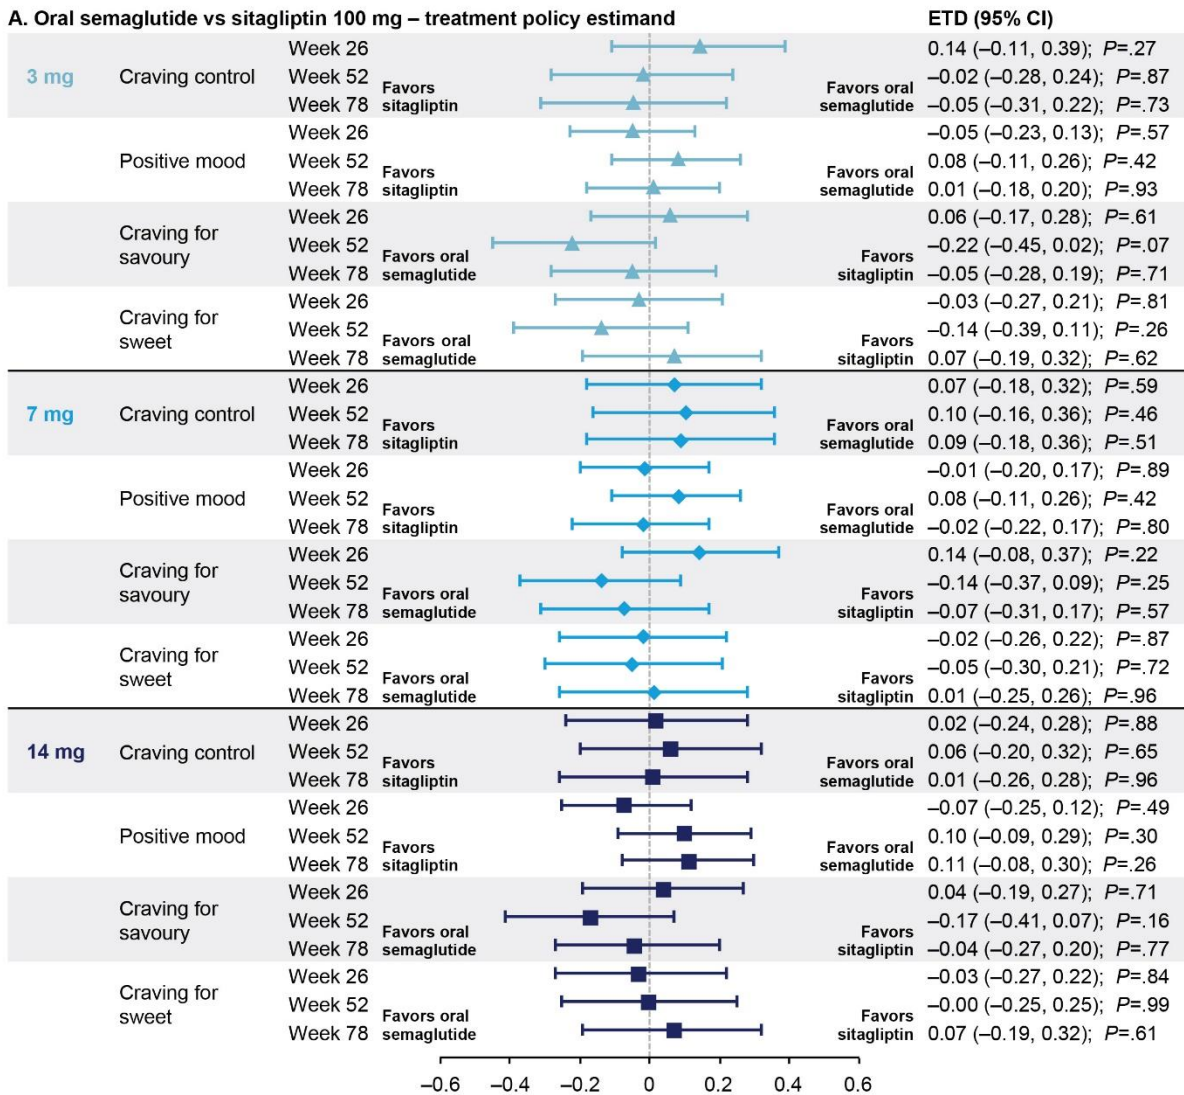

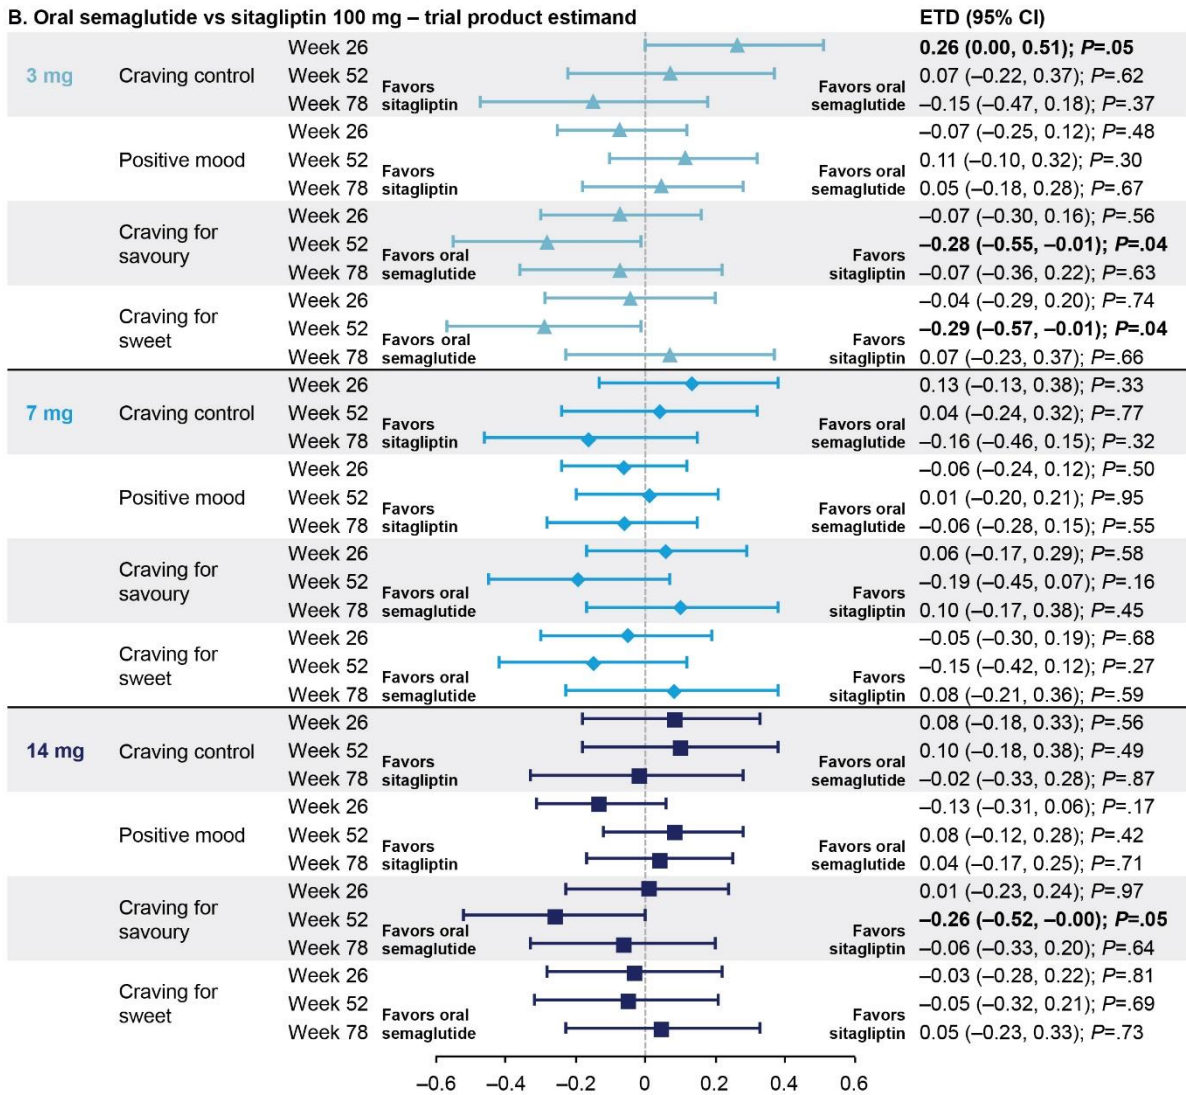

Abbreviation: CI, confidence interval; ETD, estimated treatment difference.

P values are unadjusted two-sided P values for the test of no difference.

Treatment policy estimand: Analysis of covariance using data irrespective of discontinuation of trial product or initiation of rescue medication. Missing values were imputed by a pattern mixture model using multiple imputation. Pattern was defined by randomized trial product and treatment status (premature trial product discontinuation and/or initiation of rescue medication).

Trial product estimand: Mixed model for repeated measurements. Data collected after discontinuation of trial product or initiation of rescue medication were excluded.

**eFigure 8. Overview of On-Treatment Nausea Events**

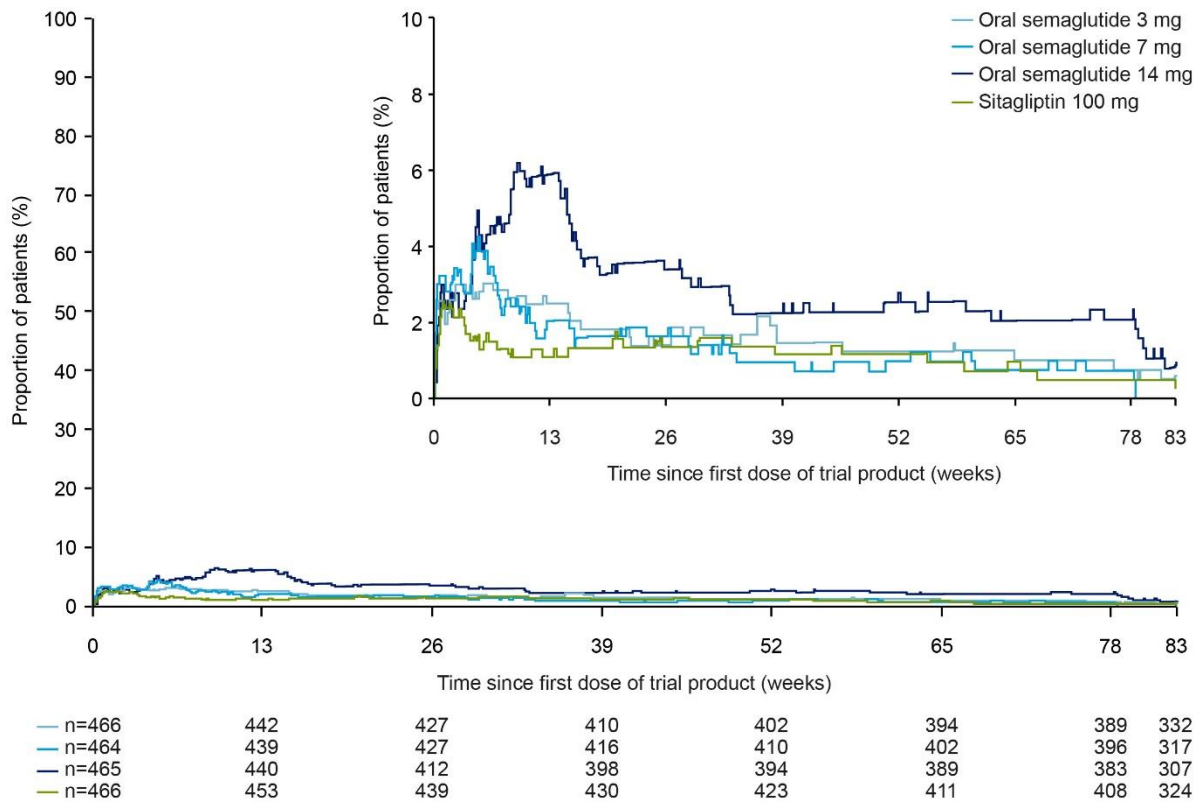

On-treatment: The period where the patient is considered treated with trial product.

The figure shows the proportion of patients with nausea events during the course of the trial. The inset figure are the same data but with the axis truncated to allow better visualization.

**eTable 1. List of Inclusion and Exclusion Criteria**

| <b>Inclusion criteria</b> |                                                                                                                                                                                                                                                                                                                                                                                                                                                                                                                                                                                                                                                                                                                                                                                                                                                                                                                                                                                                                                                                                                                                                                                                                                                                                                                                                                                                                                                                                                                                                                                                                                                                                                          |
|---------------------------|----------------------------------------------------------------------------------------------------------------------------------------------------------------------------------------------------------------------------------------------------------------------------------------------------------------------------------------------------------------------------------------------------------------------------------------------------------------------------------------------------------------------------------------------------------------------------------------------------------------------------------------------------------------------------------------------------------------------------------------------------------------------------------------------------------------------------------------------------------------------------------------------------------------------------------------------------------------------------------------------------------------------------------------------------------------------------------------------------------------------------------------------------------------------------------------------------------------------------------------------------------------------------------------------------------------------------------------------------------------------------------------------------------------------------------------------------------------------------------------------------------------------------------------------------------------------------------------------------------------------------------------------------------------------------------------------------------|
| 1.                        | Informed consent obtained before any trial-related activities. Trial-related activities are defined as any procedures that are carried out as part of the trial, including activities to determine suitability for the trial.                                                                                                                                                                                                                                                                                                                                                                                                                                                                                                                                                                                                                                                                                                                                                                                                                                                                                                                                                                                                                                                                                                                                                                                                                                                                                                                                                                                                                                                                            |
| 2.                        | Male or female, age $\geq 18$ years at the time of signing informed consent.<br><i>For Japan only: Male or female, age <math>\geq 20</math> years at the time of signing informed consent.</i>                                                                                                                                                                                                                                                                                                                                                                                                                                                                                                                                                                                                                                                                                                                                                                                                                                                                                                                                                                                                                                                                                                                                                                                                                                                                                                                                                                                                                                                                                                           |
| 3.                        | Diagnosed with type 2 diabetes $\geq 90$ days prior to day of screening.                                                                                                                                                                                                                                                                                                                                                                                                                                                                                                                                                                                                                                                                                                                                                                                                                                                                                                                                                                                                                                                                                                                                                                                                                                                                                                                                                                                                                                                                                                                                                                                                                                 |
| 4.                        | HbA <sub>1c</sub> 7.0–10.5% (53–91 mmol/mol) (both inclusive).                                                                                                                                                                                                                                                                                                                                                                                                                                                                                                                                                                                                                                                                                                                                                                                                                                                                                                                                                                                                                                                                                                                                                                                                                                                                                                                                                                                                                                                                                                                                                                                                                                           |
| 5.                        | Stable daily dose of metformin ( $\geq 1500$ mg or maximum tolerated dose as documented in the patient medical record) alone, or in combination with sulfonylurea ( $\geq$ half of the maximum approved dose according to local label or maximum tolerated dose as documented in the patient medical record), within 90 days prior to the day of screening.                                                                                                                                                                                                                                                                                                                                                                                                                                                                                                                                                                                                                                                                                                                                                                                                                                                                                                                                                                                                                                                                                                                                                                                                                                                                                                                                              |
| <b>Exclusion criteria</b> |                                                                                                                                                                                                                                                                                                                                                                                                                                                                                                                                                                                                                                                                                                                                                                                                                                                                                                                                                                                                                                                                                                                                                                                                                                                                                                                                                                                                                                                                                                                                                                                                                                                                                                          |
| 1.                        | Known or suspected hypersensitivity to trial products or related products.                                                                                                                                                                                                                                                                                                                                                                                                                                                                                                                                                                                                                                                                                                                                                                                                                                                                                                                                                                                                                                                                                                                                                                                                                                                                                                                                                                                                                                                                                                                                                                                                                               |
| 2.                        | Previous participation in this trial. Participation is defined as signed informed consent.                                                                                                                                                                                                                                                                                                                                                                                                                                                                                                                                                                                                                                                                                                                                                                                                                                                                                                                                                                                                                                                                                                                                                                                                                                                                                                                                                                                                                                                                                                                                                                                                               |
| 3.                        | Female who is pregnant, breast-feeding or intends to become pregnant or is of child-bearing potential and not using adequate contraceptive methods (adequate contraceptive measures as required by local regulation or practice).<br><i>For Germany only: Only highly effective methods of birth control are accepted (i.e. one that results in <math>\leq 1\%</math> per year failure rate when used consistently and correctly such as implants, injectables, combined oral contraceptives, some intrauterine device), or sexual abstinence or vasectomized partner.</i><br><i>For United Kingdom only: Adequate contraceptive measures are defined as established use of oral, intravaginal, transdermal combined estrogen and progestogen hormonal methods of contraception; oral, injected or implanted progestogen only hormonal methods of contraception; placement of an intrauterine device or intrauterine hormone releasing system, bilateral tubal occlusion, barrier methods of contraception (condom or occlusive cap with spermicidal foam/gel/film/cream/suppository), female sterilization, vasectomized partner (where partner is sole partner of patient), or true abstinence (when in line with preferred and usual lifestyle).</i><br><i>For Brazil only: For women who expressly declare free of the risk of pregnancy, either by not engaging in sexual activity or by having sexual activity with no birth potential risk, use of contraceptive method will not be mandatory.</i><br><i>For Japan only: Adequate contraceptive measures are abstinence (not having sex), diaphragm, condom (by the partner), intrauterine device, sponge, spermicide or oral contraceptives.</i> |
| 4.                        | Receipt of any investigational medicinal product within 90 days before screening.<br><i>For Brazil only: Participation in other trials within one year prior to screening visit (visit 1) unless there is a direct benefit to the research patient at the investigator's discretion.</i>                                                                                                                                                                                                                                                                                                                                                                                                                                                                                                                                                                                                                                                                                                                                                                                                                                                                                                                                                                                                                                                                                                                                                                                                                                                                                                                                                                                                                 |
| 5.                        | Any disorder, which in the investigator's opinion might jeopardize patient's safety or compliance with the protocol.                                                                                                                                                                                                                                                                                                                                                                                                                                                                                                                                                                                                                                                                                                                                                                                                                                                                                                                                                                                                                                                                                                                                                                                                                                                                                                                                                                                                                                                                                                                                                                                     |
| 6.                        | Family or personal history of MEN2 or MTC.                                                                                                                                                                                                                                                                                                                                                                                                                                                                                                                                                                                                                                                                                                                                                                                                                                                                                                                                                                                                                                                                                                                                                                                                                                                                                                                                                                                                                                                                                                                                                                                                                                                               |
| 7.                        | History of pancreatitis (acute or chronic).                                                                                                                                                                                                                                                                                                                                                                                                                                                                                                                                                                                                                                                                                                                                                                                                                                                                                                                                                                                                                                                                                                                                                                                                                                                                                                                                                                                                                                                                                                                                                                                                                                                              |
| 8.                        | History of major surgical procedures involving the stomach potentially affecting absorption of trial product (e.g. subtotal and total gastrectomy, sleeve gastrectomy, gastric bypass surgery).                                                                                                                                                                                                                                                                                                                                                                                                                                                                                                                                                                                                                                                                                                                                                                                                                                                                                                                                                                                                                                                                                                                                                                                                                                                                                                                                                                                                                                                                                                          |
| 9.                        | Any of the following: myocardial infarction, stroke or hospitalization for unstable angina and/or transient ischemic attack within the past 180 days prior to the day of screening.                                                                                                                                                                                                                                                                                                                                                                                                                                                                                                                                                                                                                                                                                                                                                                                                                                                                                                                                                                                                                                                                                                                                                                                                                                                                                                                                                                                                                                                                                                                      |
| 10.                       | Patients presently classified as being in NYHA Class IV.                                                                                                                                                                                                                                                                                                                                                                                                                                                                                                                                                                                                                                                                                                                                                                                                                                                                                                                                                                                                                                                                                                                                                                                                                                                                                                                                                                                                                                                                                                                                                                                                                                                 |
| 11.                       | Planned coronary, carotid or peripheral artery revascularization known on the day of screening.                                                                                                                                                                                                                                                                                                                                                                                                                                                                                                                                                                                                                                                                                                                                                                                                                                                                                                                                                                                                                                                                                                                                                                                                                                                                                                                                                                                                                                                                                                                                                                                                          |

12. Renal impairment defined as eGFR  $<60$  mL/min/1.73 m<sup>2</sup> as per CKD-EPI.
13. Treatment with any medication for the indication of diabetes or obesity, other than stated in the inclusion criteria, in a period of 90 days before the day of screening. An exception is short-term insulin treatment for acute illness for a total of  $\leq 14$  days.
14. Proliferative retinopathy or maculopathy requiring acute treatment. Verified by fundus photography or dilated funduscopy performed within 90 days prior to randomization.
15. History or presence of malignant neoplasms within the last 5 years (except basal and squamous cell skin cancer and in-situ carcinomas).

Abbreviation: CKD-EPI, Chronic Kidney Disease Epidemiology Collaboration; eGFR, estimated glomerular filtration rate; MEN2, multiple endocrine neoplasia type 2; MTC, medullary thyroid carcinoma; NYHA, New York Heart Association.

**eTable 2. Rescue Medication and Additional Glucose-Lowering Medication Use**

|                                                                  | Week 26          |                 |                  |                                  | Week 52           |                  |                  |                                  | Week 78           |                   |                  |                                  |
|------------------------------------------------------------------|------------------|-----------------|------------------|----------------------------------|-------------------|------------------|------------------|----------------------------------|-------------------|-------------------|------------------|----------------------------------|
|                                                                  | Oral semaglutide |                 |                  | Sitagliptin<br>100 mg<br>(N=467) | Oral semaglutide  |                  |                  | Sitagliptin<br>100 mg<br>(N=466) | Oral semaglutide  |                   |                  | Sitagliptin<br>100 mg<br>(N=467) |
|                                                                  | 3 mg<br>(N=466)  | 7 mg<br>(N=465) | 14 mg<br>(N=465) |                                  | 3 mg<br>(N=466)   | 7 mg<br>(N=465)  | 14 mg<br>(N=465) |                                  | 3 mg<br>(N=466)   | 7 mg<br>(N=465)   | 14 mg<br>(N=465) |                                  |
| <b>Patients on rescue medication<sup>a</sup>, n (%)</b>          | <b>25 (5.4)</b>  | <b>11 (2.4)</b> | <b>5 (1.1)</b>   | <b>13 (2.8)</b>                  | <b>121 (26.0)</b> | <b>73 (15.7)</b> | <b>31 (6.7)</b>  | <b>94 (20.1)</b>                 | <b>160 (34.3)</b> | <b>103 (22.2)</b> | <b>47 (10.1)</b> | <b>129 (27.6)</b>                |
| Sulfonylureas                                                    | 13 (2.8)         | 5 (1.1)         | 3 (0.6)          | 8 (1.7)                          | 54 (11.6)         | 40 (8.6)         | 22 (4.7)         | 54 (11.6)                        | 75 (16.1)         | 56 (12.0)         | 28 (6.0)         | 76 (16.3)                        |
| SGLT2 inhibitors                                                 | 1 (0.2)          | 4 (0.9)         | 0 (0.0)          | 1 (0.2)                          | 25 (5.4)          | 15 (3.2)         | 6 (1.3)          | 22 (4.7)                         | 41 (8.8)          | 24 (5.2)          | 9 (1.9)          | 31 (6.6)                         |
| Biguanides                                                       | 3 (0.6)          | 1 (0.2)         | 1 (0.2)          | 5 (1.1)                          | 29 (6.2)          | 13 (2.8)         | 3 (0.6)          | 24 (5.1)                         | 36 (7.7)          | 20 (4.3)          | 4 (0.9)          | 31 (6.6)                         |
| Insulins, long-acting                                            | 5 (1.1)          | 1 (0.2)         | 1 (0.2)          | 2 (0.4)                          | 17 (3.6)          | 10 (2.2)         | 6 (1.3)          | 10 (2.1)                         | 28 (6.0)          | 17 (3.7)          | 14 (3.0)         | 16 (3.4)                         |
| Thiazolidinediones                                               | 2 (0.4)          | 0 (0.0)         | 0 (0.0)          | 1 (0.2)                          | 7 (1.5)           | 2 (0.4)          | 0 (0.0)          | 6 (1.3)                          | 9 (1.9)           | 4 (0.9)           | 1 (0.2)          | 9 (1.9)                          |
| Insulins, intermediate-acting                                    | 2 (0.4)          | 0 (0.0)         | 0 (0.0)          | 0 (0.0)                          | 4 (0.9)           | 2 (0.4)          | 1 (0.2)          | 2 (0.4)                          | 9 (1.9)           | 5 (1.1)           | 3 (0.6)          | 3 (0.6)                          |
| Alpha glucosidase inhibitors                                     | 0 (0.0)          | 0 (0.0)         | 0 (0.0)          | 0 (0.0)                          | 3 (0.6)           | 3 (0.6)          | 0 (0.0)          | 0 (0.0)                          | 6 (1.3)           | 3 (0.6)           | 1 (0.2)          | 1 (0.2)                          |
| Insulins, fast-acting                                            | 0 (0.0)          | 0 (0.0)         | 0 (0.0)          | 0 (0.0)                          | 1 (0.2)           | 0 (0.0)          | 0 (0.0)          | 1 (0.2)                          | 2 (0.4)           | 1 (0.2)           | 2 (0.4)          | 1 (0.2)                          |
| Insulins, intermediate- or long-acting combined with fast-acting | 0 (0.0)          | 0 (0.0)         | 0 (0.0)          | 0 (0.0)                          | 2 (0.4)           | 1 (0.2)          | 0 (0.0)          | 0 (0.0)                          | 2 (0.4)           | 3 (0.6)           | 0 (0.0)          | 1 (0.2)                          |

|                                                                                             | Week 26          |                 |                  |                                  | Week 52           |                  |                  |                                  | Week 78           |                   |                  |                                  |
|---------------------------------------------------------------------------------------------|------------------|-----------------|------------------|----------------------------------|-------------------|------------------|------------------|----------------------------------|-------------------|-------------------|------------------|----------------------------------|
|                                                                                             | Oral semaglutide |                 |                  | Sitagliptin<br>100 mg<br>(N=467) | Oral semaglutide  |                  |                  | Sitagliptin<br>100 mg<br>(N=466) | Oral semaglutide  |                   |                  | Sitagliptin<br>100 mg<br>(N=467) |
|                                                                                             | 3 mg<br>(N=466)  | 7 mg<br>(N=465) | 14 mg<br>(N=465) |                                  | 3 mg<br>(N=466)   | 7 mg<br>(N=465)  | 14 mg<br>(N=465) |                                  | 3 mg<br>(N=466)   | 7 mg<br>(N=465)   | 14 mg<br>(N=465) |                                  |
| Glinides                                                                                    | 0 (0.0)          | 0 (0.0)         | 0 (0.0)          | 0 (0.0)                          | 1 (0.2)           | 1 (0.2)          | 0 (0.0)          | 0 (0.0)                          | 1 (0.2)           | 1 (0.2)           | 1 (0.2)          | 0 (0.0)                          |
| DPP-4 inhibitors                                                                            | 0 (0.0)          | 0 (0.0)         | 0 (0.0)          | 0 (0.0)                          | 0 (0.0)           | 0 (0.0)          | 0 (0.0)          | 0 (0.0)                          | 0 (0.0)           | 0 (0.0)           | 1 (0.2)          | 0 (0.0)                          |
| <b>Patients on<br/>additional<br/>glucose-lowering<br/>medication<sup>b</sup>,<br/>n(%)</b> | <b>33 (7.1)</b>  | <b>20 (4.3)</b> | <b>15 (3.2)</b>  | <b>20 (4.3)</b>                  | <b>137 (29.4)</b> | <b>86 (18.5)</b> | <b>51 (11.0)</b> | <b>111 (23.8)</b>                | <b>179 (38.4)</b> | <b>119 (25.6)</b> | <b>75 (16.1)</b> | <b>148 (31.7)</b>                |
| Sulfonylureas                                                                               | 16 (3.4)         | 6 (1.3)         | 7 (1.5)          | 11 (2.4)                         | 59 (12.7)         | 44 (9.5)         | 32 (6.9)         | 61 (13.1)                        | 82 (17.6)         | 61 (13.1)         | 43 (9.2)         | 83 (17.8)                        |
| SGLT2 inhibitors                                                                            | 2 (0.4)          | 6 (1.3)         | 2 (0.4)          | 1 (0.2)                          | 27 (5.8)          | 18 (3.9)         | 10 (2.2)         | 23 (4.9)                         | 45 (9.7)          | 28 (6.0)          | 16 (3.4)         | 34 (7.3)                         |
| Biguanides                                                                                  | 5 (1.1)          | 1 (0.2)         | 2 (0.4)          | 6 (1.3)                          | 32 (6.9)          | 13 (2.8)         | 7 (1.5)          | 27 (5.8)                         | 39 (8.4)          | 20 (4.3)          | 10 (2.2)         | 35 (7.5)                         |
| Insulins, long-acting                                                                       | 5 (1.1)          | 2 (0.4)         | 2 (0.4)          | 3 (0.6)                          | 18 (3.9)          | 14 (3.0)         | 10 (2.2)         | 13 (2.8)                         | 31 (6.7)          | 22 (4.7)          | 18 (3.9)         | 22 (4.7)                         |
| DPP-4 inhibitors                                                                            | 1 (0.2)          | 5 (1.1)         | 4 (0.9)          | 4 (0.9)                          | 2 (0.4)           | 7 (1.5)          | 7 (1.5)          | 5 (1.1)                          | 4 (0.9)           | 7 (1.5)           | 11 (2.4)         | 6 (1.3)                          |
| Thiazolidinediones                                                                          | 2 (0.4)          | 0 (0.0)         | 0 (0.0)          | 1 (0.2)                          | 7 (1.5)           | 2 (0.4)          | 0 (0.0)          | 7 (1.5)                          | 9 (1.9)           | 4 (0.9)           | 1 (0.2)          | 10 (2.1)                         |
| Insulins, intermediate-acting                                                               | 3 (0.6)          | 0 (0.0)         | 0 (0.0)          | 0 (0.0)                          | 5 (1.1)           | 2 (0.4)          | 1 (0.2)          | 2 (0.4)                          | 10 (2.1)          | 5 (1.1)           | 4 (0.9)          | 3 (0.6)                          |
| Insulins, fast-acting                                                                       | 1 (0.2)          | 0 (0.0)         | 0 (0.0)          | 1 (0.2)                          | 4 (0.9)           | 2 (0.4)          | 3 (0.6)          | 4 (0.9)                          | 6 (1.3)           | 4 (0.9)           | 5 (1.1)          | 4 (0.9)                          |
| Alpha glucosidase inhibitors                                                                | 1 (0.2)          | 1 (0.2)         | 0 (0.0)          | 0 (0.0)                          | 5 (1.1)           | 4 (0.9)          | 0 (0.0)          | 0 (0.0)                          | 8 (1.7)           | 4 (0.9)           | 1 (0.2)          | 3 (0.6)                          |
| GLP-1RAs                                                                                    | 1 (0.2)          | 1 (0.2)         | 0 (0.0)          | 1 (0.2)                          | 4 (0.9)           | 1 (0.2)          | 0 (0.0)          | 3 (0.6)                          | 5 (1.1)           | 1 (0.2)           | 1 (0.2)          | 3 (0.6)                          |

|                                                                              | Week 26          |                 |                  |                                  | Week 52          |                 |                  |                                  | Week 78          |                 |                  |                                  |
|------------------------------------------------------------------------------|------------------|-----------------|------------------|----------------------------------|------------------|-----------------|------------------|----------------------------------|------------------|-----------------|------------------|----------------------------------|
|                                                                              | Oral semaglutide |                 |                  | Sitagliptin<br>100 mg<br>(N=467) | Oral semaglutide |                 |                  | Sitagliptin<br>100 mg<br>(N=466) | Oral semaglutide |                 |                  | Sitagliptin<br>100 mg<br>(N=467) |
|                                                                              | 3 mg<br>(N=466)  | 7 mg<br>(N=465) | 14 mg<br>(N=465) |                                  | 3 mg<br>(N=466)  | 7 mg<br>(N=465) | 14 mg<br>(N=465) |                                  | 3 mg<br>(N=466)  | 7 mg<br>(N=465) | 14 mg<br>(N=465) |                                  |
| Insulins,<br>intermediate- or<br>long-acting<br>combined with<br>fast-acting | 0 (0.0)          | 0 (0.0)         | 0 (0.0)          | 0 (0.0)                          | 2 (0.4)          | 2 (0.4)         | 0 (0.0)          | 0 (0.0)                          | 3 (0.6)          | 4 (0.9)         | 0 (0.0)          | 1 (0.2)                          |
| Glinides                                                                     | 0 (0.0)          | 0 (0.0)         | 0 (0.0)          | 0 (0.0)                          | 1 (0.2)          | 1 (0.2)         | 0 (0.0)          | 0 (0.0)                          | 1 (0.2)          | 1 (0.2)         | 1 (0.2)          | 0 (0.0)                          |
| Oral drug<br>combination                                                     | 0 (0.0)          | 0 (0.0)         | 0 (0.0)          | 1 (0.2)                          | 0 (0.0)          | 0 (0.0)         | 0 (0.0)          | 1 (0.2)                          | 0 (0.0)          | 0 (0.0)         | 0 (0.0)          | 1 (0.2)                          |

Abbreviation: DPP, dipeptidyl peptidase-4; GLP-1RA, glucagon-like peptide-1 receptor agonist; SGLT2, sodium-glucose cotransporter 2.

<sup>a</sup> Initiated after randomization and before last day on trial product. Criteria for initiation of rescue medication were fasting plasma glucose (at central laboratory) >260 mg/dL (14.4 mmol/L) for weeks 8–13, >240 mg/dL (13.3 mmol/L) for weeks 14–25, and >200 mg/dL (11.1 mmol/L) or HbA<sub>1c</sub> >8.5% (at central laboratory) for week 26 onwards.

<sup>b</sup> Initiated after randomization and before planned end of treatment. Additional glucose-lowering medication includes 1) the use of rescue medication, and/or 2) the use of glucose-lowering medication for patients who discontinued the trial product but remained in the trial.



**eTable 3. Tipping Point Analyses for Changes From Baseline in HbA<sub>1c</sub> and Body Weight at Week 26 for the Treatment Policy Estimand**

| <b>Tipping point</b>                            | <b>Hypothesis</b> | <b>alpha</b> | <b>Penalty</b> |
|-------------------------------------------------|-------------------|--------------|----------------|
| <b>HbA<sub>1c</sub> change from baseline, %</b> |                   |              |                |
| Oral semaglutide 14 mg vs sitagliptin 100 mg    | Non-inferiority   | 0.050        | 9.6            |
|                                                 | Superiority       | 0.025        | 5.5            |
| Oral semaglutide 7 mg vs sitagliptin 100 mg     | Non-inferiority   | 0.050        | 6.6            |
|                                                 | Superiority       | 0.025        | 2.0            |
| <b>Body weight change from baseline, kg</b>     |                   |              |                |
| Oral semaglutide 14 mg vs sitagliptin 100 mg    | Superiority       | 0.025        | 31.3           |
| Oral semaglutide 7 mg vs sitagliptin 100 mg     | Superiority       | 0.025        | 17.7           |

'alpha': local significance level according to the testing strategy where the conclusion for the hypothesis in question was no longer confirmed; 'Penalty': penalty that had to be added to imputed values for the oral semaglutide group in question in order for the conclusion to change. For the non-inferiority analysis, the penalty does not include the fixed non-inferiority margin penalty added on imputed values in any oral semaglutide group.

**eTable 4. Time to Rescue Medication and Additional Glucose-Lowering Medication**

|                                                                                                                                  | <b>Hazard ratio (95% CI)</b> | <b>P value</b> |
|----------------------------------------------------------------------------------------------------------------------------------|------------------------------|----------------|
| <b>Time from first dose to rescue medication with oral semaglutide vs sitagliptin 100 mg<sup>a</sup></b>                         |                              |                |
| 3 mg                                                                                                                             | 1.33 (1.05, 1.68)            | .02            |
| 7 mg                                                                                                                             | 0.66 (0.51, 0.86)            | .002           |
| 14 mg                                                                                                                            | 0.31 (0.22, 0.43)            | <.001          |
| <b>Time from randomization to additional glucose-lowering medication with oral semaglutide vs sitagliptin 100 mg<sup>b</sup></b> |                              |                |
| 3 mg                                                                                                                             | 1.34 (1.09, 1.65)            | .006           |
| 7 mg                                                                                                                             | 0.77 (0.61, 0.96)            | .02            |
| 14 mg                                                                                                                            | 0.53 (0.41, 0.68)            | <.001          |

Abbreviation: CI, confidence interval.

<sup>a</sup> Initiated after randomization and before last day on trial product. Data from the on-treatment without rescue medication period. Time to initiation of rescue medication was analyzed using a Cox proportional hazards model with treatment, background medication, and region as factors and baseline HbA<sub>1c</sub> as covariate. Censoring time was one day before last day on trial product.

<sup>b</sup> Initiated after randomization and before planned end of treatment. Additional glucose-lowering medication includes 1) the use of rescue medication, and/or 2) the use of glucose-lowering medication for patients who discontinued the trial product but remained in the trial. Data from the in-trial observation period. Time to initiation of additional glucose-lowering medication was analyzed using a Cox proportional hazards model with treatment, background medication, and region as factors and baseline HbA<sub>1c</sub> as covariate. Withdrawal for any reason or lost to follow-up contributed to the analysis as events (initiation of additional glucose-lowering medication). Censoring time was one day before planned end of treatment.

P values are unadjusted two-sided P values for the test of no difference.

**eTable 5. Additional Secondary Endpoints Not Included in the Main Text**

|                                                                                       | Treatment policy estimand |                      |                      |                               | Trial product estimand |                      |                      |                               |
|---------------------------------------------------------------------------------------|---------------------------|----------------------|----------------------|-------------------------------|------------------------|----------------------|----------------------|-------------------------------|
|                                                                                       | Oral semaglutide          |                      |                      | Sitagliptin 100 mg<br>(N=467) | Oral semaglutide       |                      |                      | Sitagliptin 100 mg<br>(N=467) |
|                                                                                       | 3 mg<br>(N=466)           | 7 mg<br>(N=465)      | 14 mg<br>(N=465)     |                               | 3 mg<br>(N=466)        | 7 mg<br>(N=465)      | 14 mg<br>(N=465)     |                               |
| <b>Change from baseline in body weight, %</b>                                         |                           |                      |                      |                               |                        |                      |                      |                               |
| <b>Week 26</b>                                                                        |                           |                      |                      |                               |                        |                      |                      |                               |
| Estimated mean change from baseline                                                   | -1.2                      | -2.3                 | -3.4                 | -0.6                          | -1.3                   | -2.4                 | -3.6                 | -0.7                          |
| ETD vs sitagliptin (95% CI)                                                           | -0.6<br>(-1.1, -0.1)      | -1.7<br>(-2.2, -1.2) | -2.8<br>(-3.3, -2.3) | -                             | -0.6<br>(-1.1, -0.0)   | -1.7<br>(-2.2, -1.2) | -2.9<br>(-3.4, -2.4) | -                             |
| <i>P</i> value                                                                        | .02                       | <.001                | <.001                | -                             | .03                    | <.001                | <.001                | -                             |
| <b>Week 52</b>                                                                        |                           |                      |                      |                               |                        |                      |                      |                               |
| Estimated mean change from baseline                                                   | -1.7                      | -2.5                 | -3.7                 | -0.8                          | -1.7                   | -2.5                 | -4.2                 | -0.9                          |
| ETD vs sitagliptin (95% CI)                                                           | -0.9<br>(-1.6, -0.3)      | -1.8<br>(-2.4, -1.1) | -3.0<br>(-3.6, -2.3) | -                             | -0.8<br>(-1.4, -0.1)   | -1.6<br>(-2.2, -1.0) | -3.2<br>(-3.9, -2.6) | -                             |
| <i>P</i> value                                                                        | .006                      | <.001                | <.001                | -                             | .02                    | <.001                | <.001                | -                             |
| <b>Week 78</b>                                                                        |                           |                      |                      |                               |                        |                      |                      |                               |
| Estimated mean change from baseline                                                   | -1.9                      | -2.8                 | -3.4                 | -1.0                          | -1.9                   | -2.9                 | -3.9                 | -1.2                          |
| ETD vs sitagliptin (95% CI)                                                           | -0.9<br>(-1.6, -0.1)      | -1.8<br>(-2.5, -1.1) | -2.4<br>(-3.1, -1.7) | -                             | -0.7<br>(-1.5, -0.0)   | -1.7<br>(-2.4, -1.0) | -2.7<br>(-3.4, -2.0) | -                             |
| <i>P</i> value                                                                        | .02                       | <.001                | <.001                | -                             | .05                    | <.001                | <.001                | -                             |
| <b>7-point self-measured blood glucose<sup>a</sup> post-prandial increment, mg/dL</b> |                           |                      |                      |                               |                        |                      |                      |                               |
| <b>Week 26</b>                                                                        |                           |                      |                      |                               |                        |                      |                      |                               |
| Estimated mean                                                                        | 34.6                      | 33.0                 | 32.3                 | 31.5                          | 35.5                   | 33.3                 | 31.1                 | 30.7                          |

|                                     | Treatment policy estimand |                     |                     |                               | Trial product estimand |                     |                     |                               |
|-------------------------------------|---------------------------|---------------------|---------------------|-------------------------------|------------------------|---------------------|---------------------|-------------------------------|
|                                     | Oral semaglutide          |                     |                     | Sitagliptin 100 mg<br>(N=467) | Oral semaglutide       |                     |                     | Sitagliptin 100 mg<br>(N=467) |
|                                     | 3 mg<br>(N=466)           | 7 mg<br>(N=465)     | 14 mg<br>(N=465)    |                               | 3 mg<br>(N=466)        | 7 mg<br>(N=465)     | 14 mg<br>(N=465)    |                               |
| Estimated mean change from baseline | -6.2                      | -7.9                | -8.6                | -9.4                          | -6.2                   | -8.4                | -10.5               | -10.9                         |
| ETD vs sitagliptin (95% CI)         | 3.2<br>(-1.0, 7.3)        | 1.5<br>(-2.6, 5.6)  | 0.8<br>(-3.6, 5.2)  | -                             | 4.7<br>(0.8, 8.7)      | 2.6<br>(-1.4, 6.5)  | 0.4<br>(-3.5, 4.3)  | -                             |
| <i>P</i> value                      | .14                       | .48                 | .72                 | -                             | .02                    | .20                 | .84                 | -                             |
| <b>Week 52</b>                      |                           |                     |                     |                               |                        |                     |                     |                               |
| Estimated mean                      | 34.8                      | 32.5                | 31.7                | 33.9                          | 34.8                   | 30.9                | 30.9                | 33.4                          |
| Estimated mean change from baseline | -6.1                      | -8.4                | -9.2                | -7.0                          | -6.9                   | -10.8               | -10.8               | -8.3                          |
| ETD vs sitagliptin (95% CI)         | 0.8<br>(-3.2, 4.9)        | -1.4<br>(-5.4, 2.6) | -2.3<br>(-6.4, 1.9) | -                             | 1.4<br>(-3.0, 5.8)     | -2.5<br>(-6.7, 1.7) | -2.6<br>(-6.7, 1.6) | -                             |
| <i>P</i> value                      | .69                       | .49                 | .28                 | -                             | .54                    | .24                 | .23                 | -                             |
| <b>Week 78</b>                      |                           |                     |                     |                               |                        |                     |                     |                               |
| Estimated mean                      | 34.9                      | 32.3                | 31.9                | 31.1                          | 34.0                   | 32.6                | 32.6                | 29.6                          |
| Estimated mean change from baseline | -6.0                      | -8.6                | -9.0                | -9.8                          | -7.7)                  | -9.1)               | -9.1                | -12.1                         |
| ETD vs sitagliptin (95% CI)         | 3.8<br>(-0.4, 8.0)        | 1.2<br>(-3.0, 5.4)  | 0.7<br>(-3.6, 5.0)  | -                             | 4.3<br>(-0.6, 9.3)     | 2.9<br>(-1.7, 7.6)  | 3.0<br>(-1.6, 7.6)  | -                             |
| <i>P</i> value                      | .08                       | .58                 | .75                 | -                             | .08                    | .22                 | .20                 | -                             |
| <b>HbA<sub>1c</sub> ≤6.5%</b>       |                           |                     |                     |                               |                        |                     |                     |                               |
| <b>Week 26</b>                      |                           |                     |                     |                               |                        |                     |                     |                               |
| Estimated proportion of patients, % | 13                        | 26                  | 36                  | 14                            | 13                     | 27                  | 39                  | 14                            |

|                                     | Treatment policy estimand |                 |                  |                               | Trial product estimand |                 |                  |                               |
|-------------------------------------|---------------------------|-----------------|------------------|-------------------------------|------------------------|-----------------|------------------|-------------------------------|
|                                     | Oral semaglutide          |                 |                  | Sitagliptin 100 mg<br>(N=467) | Oral semaglutide       |                 |                  | Sitagliptin 100 mg<br>(N=467) |
|                                     | 3 mg<br>(N=466)           | 7 mg<br>(N=465) | 14 mg<br>(N=465) |                               | 3 mg<br>(N=466)        | 7 mg<br>(N=465) | 14 mg<br>(N=465) |                               |
| ETD vs sitagliptin (95% CI)         | -1 (-5, 3)                | 12 (7, 17)      | 22 (16, 27)      | -                             | -1 (-5, 3)             | 13 (8, 18)      | 25 (20, 31)      | -                             |
| <i>P</i> value                      | .60                       | <.001           | <.001            | -                             | .62                    | <.001           | <.001            | -                             |
| <b>Week 52</b>                      |                           |                 |                  |                               |                        |                 |                  |                               |
| Estimated proportion of patients, % | 14                        | 22              | 32               | 14                            | 12                     | 23              | 35               | 14                            |
| ETD vs sitagliptin (95% CI)         | -0 (-5, 4)                | 8 (3, 13)       | 18 (13, 24)      | -                             | -2 (-6, 2)             | 9 (4, 14)       | 21 (16, 27)      | -                             |
| <i>P</i> value                      | .90                       | .001            | <.001            | -                             | .42                    | <.001           | <.001            | -                             |
| <b>Week 78</b>                      |                           |                 |                  |                               |                        |                 |                  |                               |
| Estimated proportion of patients, % | 13                        | 23              | 29               | 14                            | 12                     | 21              | 32               | 13                            |
| ETD vs sitagliptin (95% CI)         | -1 (-5, 3)                | 9 (4, 14)       | 15 (10, 20)      | -                             | -2 (-6, 3)             | 8 (3, 13)       | 18 (13, 24)      | -                             |
| <i>P</i> value                      | .63                       | <.001           | <.001            | -                             | .44                    | .002            | <.001            | -                             |
| <b>Body weight loss ≥10%</b>        |                           |                 |                  |                               |                        |                 |                  |                               |
| <b>Week 26</b>                      |                           |                 |                  |                               |                        |                 |                  |                               |
| Estimated proportion of patients, % | 1                         | 5               | 7                | 2                             | 1                      | 6               | 8                | 2                             |
| ETD vs sitagliptin (95% CI)         | -0 (-2, 1)                | 4 (1, 6)        | 5 (2, 8)         | -                             | -1 (-2, 1)             | 4 (1, 6)        | 6 (3, 9)         | -                             |
| <i>P</i> value                      | .70                       | .005            | <.001            | -                             | .43                    | .005            | <.001            | -                             |
| <b>Week 52</b>                      |                           |                 |                  |                               |                        |                 |                  |                               |
| Estimated proportion of patients, % | 4                         | 7               | 11               | 3                             | 2                      | 7               | 12               | 3                             |
| ETD vs sitagliptin (95% CI)         | 1 (-1, 3)                 | 4 (2, 7)        | 8 (5, 12)        | -                             | -0 (-3, 2)             | 5 (2, 8)        | 10 (6, 13)       | -                             |

|                                          | Treatment policy estimand |                      |                      |                               | Trial product estimand |                      |                      |                               |
|------------------------------------------|---------------------------|----------------------|----------------------|-------------------------------|------------------------|----------------------|----------------------|-------------------------------|
|                                          | Oral semaglutide          |                      |                      | Sitagliptin 100 mg<br>(N=467) | Oral semaglutide       |                      |                      | Sitagliptin 100 mg<br>(N=467) |
|                                          | 3 mg<br>(N=466)           | 7 mg<br>(N=465)      | 14 mg<br>(N=465)     |                               | 3 mg<br>(N=466)        | 7 mg<br>(N=465)      | 14 mg<br>(N=465)     |                               |
| <i>P</i> value                           | .43                       | .003                 | <.001                | –                             | .74                    | .003                 | <.001                | –                             |
| <b>Week 78</b>                           |                           |                      |                      |                               |                        |                      |                      |                               |
| Estimated proportion of patients, %      | 4                         | 10                   | 11                   | 4                             | 3                      | 10                   | 12                   | 3                             |
| ETD vs sitagliptin (95% CI)              | –0 (–3, 3)                | 6 (3, 10)            | 7 (3, 10)            | –                             | –0 (–3, 2)             | 6 (3, 10)            | 9 (5, 13)            | –                             |
| <i>P</i> value                           | .89                       | <.001                | <.001                | –                             | .74                    | <.001                | <.001                | –                             |
| <b>Body mass index, kg/m<sup>2</sup></b> |                           |                      |                      |                               |                        |                      |                      |                               |
| <b>Week 26</b>                           |                           |                      |                      |                               |                        |                      |                      |                               |
| Estimated mean                           | 32.1                      | 31.7                 | 31.4                 | 32.3                          | 32.1                   | 31.7                 | 31.3                 | 32.2                          |
| Estimated mean change from baseline      | –0.4                      | –0.8                 | –1.1                 | –0.2                          | –0.4                   | –0.8                 | –1.2                 | –0.2                          |
| ETD vs sitagliptin (95% CI)              | –0.2<br>(–0.4, –0.0)      | –0.6<br>(–0.7, –0.4) | –0.9<br>(–1.1, –0.7) | –                             | –0.2<br>(–0.4, –0.0)   | –0.5<br>(–0.7, –0.4) | –0.9<br>(–1.1, –0.8) | –                             |
| <i>P</i> value                           | .02                       | <.001                | <.001                | –                             | .02                    | <.001                | <.001                | –                             |
| <b>Week 52</b>                           |                           |                      |                      |                               |                        |                      |                      |                               |
| Estimated mean                           | 31.9                      | 31.6                 | 31.3                 | 32.2                          | 31.9                   | 31.6                 | 31.1                 | 32.2                          |
| Estimated mean change from baseline      | –0.6                      | –0.9                 | –1.2                 | –0.3                          | –0.6                   | –0.9                 | –1.4                 | –0.3                          |
| ETD vs sitagliptin (95% CI)              | –0.3<br>(–0.5, –0.1)      | –0.6<br>(–0.8, –0.4) | –1.0<br>(–1.2, –0.7) | –                             | –0.3<br>(–0.5, –0.0)   | –0.5<br>(–0.7, –0.3) | –1.0<br>(–1.2, –0.8) | –                             |
| <i>P</i> value                           | .005                      | <.001                | <.001                | –                             | .02                    | <.001                | <.001                | –                             |
| <b>Week 78</b>                           |                           |                      |                      |                               |                        |                      |                      |                               |
| Estimated mean                           | 31.8                      | 31.5                 | 31.4                 | 32.1                          | 31.8                   | 31.5                 | 31.2                 | 32.1                          |

|                                     | Treatment policy estimand |                      |                      |                               | Trial product estimand |                      |                      |                               |
|-------------------------------------|---------------------------|----------------------|----------------------|-------------------------------|------------------------|----------------------|----------------------|-------------------------------|
|                                     | Oral semaglutide          |                      |                      | Sitagliptin 100 mg<br>(N=467) | Oral semaglutide       |                      |                      | Sitagliptin 100 mg<br>(N=467) |
|                                     | 3 mg<br>(N=466)           | 7 mg<br>(N=465)      | 14 mg<br>(N=465)     |                               | 3 mg<br>(N=466)        | 7 mg<br>(N=465)      | 14 mg<br>(N=465)     |                               |
| Estimated mean change from baseline | -0.7                      | -1.0                 | -1.1                 | -0.4                          | -0.7                   | -1.0                 | -1.3                 | -0.4                          |
| ETD vs sitagliptin (95% CI)         | -0.3<br>(-0.6, -0.1)      | -0.6<br>(-0.8, -0.4) | -0.8<br>(-1.0, -0.5) | -                             | -0.3<br>(-0.5, -0.0)   | -0.6<br>(-0.8, -0.3) | -0.8<br>(-1.1, -0.6) | -                             |
| <i>P</i> value                      | .01                       | <.001                | <.001                | -                             | .03                    | <.001                | <.001                | -                             |
| <b>Waist circumference (cm)</b>     |                           |                      |                      |                               |                        |                      |                      |                               |
| <b>Week 26</b>                      |                           |                      |                      |                               |                        |                      |                      |                               |
| Estimated mean                      | 106.7                     | 105.8                | 105.2                | 106.8                         | 106.8                  | 105.8                | 105.1                | 106.9                         |
| Estimated mean change from baseline | -0.7                      | -1.7                 | -2.3                 | -0.6                          | -0.7                   | -1.7                 | -2.4                 | -0.6                          |
| ETD vs sitagliptin (95% CI)         | -0.1<br>(-0.7, 0.6)       | -1.1<br>(-1.7, -0.4) | -1.6<br>(-2.3, -1.0) | -                             | -0.1<br>(-0.7, 0.6)    | -1.1<br>(-1.7, -0.4) | -1.8<br>(-2.4, -1.1) | -                             |
| <i>P</i> value                      | .83                       | .002                 | <.001                | -                             | .84                    | .002                 | <.001                | -                             |
| <b>Week 52</b>                      |                           |                      |                      |                               |                        |                      |                      |                               |
| Estimated mean                      | 106.2                     | 105.4                | 104.8                | 107.0                         | 106.0                  | 105.2                | 104.7                | 106.8                         |
| Estimated mean change from baseline | -1.3                      | -2.1                 | -2.6                 | -0.4                          | -1.5                   | -2.4                 | -2.8                 | -0.7                          |
| ETD vs sitagliptin (95% CI)         | -0.9<br>(-1.7, -0.1)      | -1.7<br>(-2.5, -0.9) | -2.2<br>(-3.0, -1.4) | -                             | -0.8<br>(-1.6, 0.0)    | -1.7<br>(-2.5, -0.8) | -2.1<br>(-2.9, -1.3) | -                             |
| <i>P</i> value                      | .03                       | <.001                | <.001                | -                             | .06                    | <.001                | <.001                | -                             |
| <b>Week 78</b>                      |                           |                      |                      |                               |                        |                      |                      |                               |
| Estimated mean                      | 106.2                     | 105.2                | 105.1                | 106.8                         | 106.1                  | 105.2                | 104.9                | 106.7                         |

|                                     | Treatment policy estimand |                      |                      |                               | Trial product estimand |                      |                      |                               |
|-------------------------------------|---------------------------|----------------------|----------------------|-------------------------------|------------------------|----------------------|----------------------|-------------------------------|
|                                     | Oral semaglutide          |                      |                      | Sitagliptin 100 mg<br>(N=467) | Oral semaglutide       |                      |                      | Sitagliptin 100 mg<br>(N=467) |
|                                     | 3 mg<br>(N=466)           | 7 mg<br>(N=465)      | 14 mg<br>(N=465)     |                               | 3 mg<br>(N=466)        | 7 mg<br>(N=465)      | 14 mg<br>(N=465)     |                               |
| Estimated mean change from baseline | -1.3                      | -2.2                 | -2.4                 | -0.7                          | -1.4                   | -2.3                 | -2.6                 | -0.8                          |
| ETD vs sitagliptin (95% CI)         | -0.6<br>(-1.4, 0.3)       | -1.6<br>(-2.4, -0.7) | -1.7<br>(-2.5, -0.9) | -                             | -0.6<br>(-1.6, 0.4)    | -1.5<br>(-2.4, -0.6) | -1.8<br>(-2.8, -0.9) | -                             |
| <i>P</i> value                      | .19                       | <.001                | <.001                | -                             | .22                    | .001                 | <.001                | -                             |
| <b>Total cholesterol (mg/dL)</b>    |                           |                      |                      |                               |                        |                      |                      |                               |
| <b>Week 26</b>                      |                           |                      |                      |                               |                        |                      |                      |                               |
| Estimated mean                      | 173                       | 170                  | 168                  | 174                           | 171                    | 170                  | 167                  | 174                           |
| Estimated ratio to baseline         | 1.00                      | 0.98                 | 0.97                 | 1.00                          | 0.99                   | 0.98                 | 0.96                 | 1.00                          |
| ETR vs sitagliptin (95% CI)         | 1.00<br>(0.97, 1.02)      | 0.98<br>(0.96, 1.00) | 0.97<br>(0.94, 0.99) | -                             | 0.99<br>(0.97, 1.01)   | 0.98<br>(0.96, 1.00) | 0.96<br>(0.94, 0.98) | -                             |
| <i>P</i> value                      | .67                       | .05                  | .001                 | -                             | .25                    | .04                  | <.001                | -                             |
| <b>Week 52</b>                      |                           |                      |                      |                               |                        |                      |                      |                               |
| Estimated mean                      | 174                       | 174                  | 171                  | 175                           | 173                    | 172                  | 170                  | 175                           |
| Estimated ratio to baseline         | 1.00                      | 1.00                 | 0.99                 | 1.01                          | 1.00                   | 0.99                 | 0.98                 | 1.01                          |
| ETR vs sitagliptin (95% CI)         | 0.99<br>(0.97, 1.02)      | 0.99<br>(0.97, 1.02) | 0.98<br>(0.96, 1.00) | -                             | 0.99<br>(0.97, 1.02)   | 0.99<br>(0.96, 1.01) | 0.97<br>(0.95, 0.99) | -                             |
| <i>P</i> value                      | .62                       | .52                  | .06                  | -                             | .51                    | .22                  | .01                  | -                             |
| <b>Week 78</b>                      |                           |                      |                      |                               |                        |                      |                      |                               |
| Estimated mean                      | 173                       | 172                  | 171                  | 174                           | 171                    | 172                  | 171                  | 173                           |
| Estimated ratio to baseline         | 1.00                      | 0.99                 | 0.99                 | 1.00                          | 0.99                   | 0.99                 | 0.98                 | 1.00                          |
| ETR vs sitagliptin (95% CI)         | 0.99<br>(0.97, 1.02)      | 0.99<br>(0.96, 1.01) | 0.99<br>(0.96, 1.01) | -                             | 0.99<br>(0.96, 1.02)   | 0.99<br>(0.97, 1.02) | 0.99<br>(0.96, 1.01) | -                             |



|                                                         | Treatment policy estimand |                      |                      |                               | Trial product estimand |                      |                      |                               |
|---------------------------------------------------------|---------------------------|----------------------|----------------------|-------------------------------|------------------------|----------------------|----------------------|-------------------------------|
|                                                         | Oral semaglutide          |                      |                      | Sitagliptin 100 mg<br>(N=467) | Oral semaglutide       |                      |                      | Sitagliptin 100 mg<br>(N=467) |
|                                                         | 3 mg<br>(N=466)           | 7 mg<br>(N=465)      | 14 mg<br>(N=465)     |                               | 3 mg<br>(N=466)        | 7 mg<br>(N=465)      | 14 mg<br>(N=465)     |                               |
| <i>P</i> value                                          | .67                       | .37                  | .28                  | –                             | .45                    | .64                  | .32                  | –                             |
| <b>Low-density lipoprotein cholesterol (mg/dL)</b>      |                           |                      |                      |                               |                        |                      |                      |                               |
| <b>Week 26</b>                                          |                           |                      |                      |                               |                        |                      |                      |                               |
| Estimated mean                                          | 94                        | 91                   | 90                   | 95                            | 93                     | 91                   | 90                   | 94                            |
| Estimated ratio to baseline                             | 1.02                      | 0.99                 | 0.98                 | 1.02                          | 1.00                   | 0.98                 | 0.98                 | 1.02                          |
| ETR vs sitagliptin (95% CI)                             | 0.99<br>(0.96, 1.03)      | 0.96<br>(0.93, 1.00) | 0.95<br>(0.92, 0.99) | –                             | 0.98<br>(0.95, 1.02)   | 0.96<br>(0.93, 1.00) | 0.96<br>(0.92, 0.99) | –                             |
| <i>P</i> value                                          | .74                       | .04                  | .008                 | –                             | .36                    | .04                  | .01                  | –                             |
| <b>Week 52</b>                                          |                           |                      |                      |                               |                        |                      |                      |                               |
| Estimated mean                                          | 94                        | 93                   | 92                   | 95                            | 93                     | 92                   | 91                   | 94                            |
| Estimated ratio to baseline                             | 1.01                      | 1.00                 | 1.00                 | 1.03                          | 1.01                   | 0.99                 | 0.98                 | 1.03                          |
| ETR vs sitagliptin (95% CI)                             | 0.99<br>(0.95, 1.02)      | 0.98<br>(0.94, 1.01) | 0.97<br>(0.94, 1.00) | –                             | 0.98<br>(0.95, 1.02)   | 0.97<br>(0.93, 1.01) | 0.96<br>(0.92, 0.99) | –                             |
| <i>P</i> value                                          | .47                       | .20                  | .09                  | –                             | .44                    | .11                  | .03                  | –                             |
| <b>Week 78</b>                                          |                           |                      |                      |                               |                        |                      |                      |                               |
| Estimated mean                                          | 95                        | 92                   | 93                   | 95                            | 93                     | 93                   | 92                   | 94                            |
| Estimated ratio to baseline                             | 1.02                      | 1.00                 | 1.00                 | 1.03                          | 1.01                   | 1.01                 | 1.00                 | 1.02                          |
| ETR vs sitagliptin (95% CI)                             | 1.00<br>(0.96, 1.04)      | 0.98<br>(0.94, 1.02) | 0.98<br>(0.94, 1.02) | –                             | 1.00<br>(0.95, 1.04)   | 0.99<br>(0.95, 1.03) | 0.99<br>(0.95, 1.03) | –                             |
| <i>P</i> value                                          | .99                       | .23                  | .31                  | –                             | .87                    | .70                  | .52                  | –                             |
| <b>Very low-density lipoprotein cholesterol (mg/dL)</b> |                           |                      |                      |                               |                        |                      |                      |                               |
| <b>Week 26</b>                                          |                           |                      |                      |                               |                        |                      |                      |                               |

|                                                     | Treatment policy estimand |                      |                      |                               | Trial product estimand |                      |                      |                               |
|-----------------------------------------------------|---------------------------|----------------------|----------------------|-------------------------------|------------------------|----------------------|----------------------|-------------------------------|
|                                                     | Oral semaglutide          |                      |                      | Sitagliptin 100 mg<br>(N=467) | Oral semaglutide       |                      |                      | Sitagliptin 100 mg<br>(N=467) |
|                                                     | 3 mg<br>(N=466)           | 7 mg<br>(N=465)      | 14 mg<br>(N=465)     |                               | 3 mg<br>(N=466)        | 7 mg<br>(N=465)      | 14 mg<br>(N=465)     |                               |
| Estimated mean                                      | 30                        | 29                   | 28                   | 29                            | 29                     | 29                   | 27                   | 29                            |
| Estimated ratio to baseline                         | 0.99                      | 0.96                 | 0.92                 | 0.98                          | 0.98                   | 0.96                 | 0.91                 | 0.97                          |
| ETR vs sitagliptin (95% CI)                         | 1.02<br>(0.97, 1.06)      | 0.98<br>(0.94, 1.03) | 0.94<br>(0.90, 0.99) | –                             | 1.01<br>(0.97, 1.05)   | 0.99<br>(0.94, 1.03) | 0.93<br>(0.89, 0.97) | –                             |
| <i>P</i> value                                      | .48                       | .43                  | .009                 | –                             | .66                    | .50                  | .001                 | –                             |
| <b>Week 52</b>                                      |                           |                      |                      |                               |                        |                      |                      |                               |
| Estimated mean                                      | 30                        | 29                   | 28                   | 30                            | 29                     | 29                   | 28                   | 29                            |
| Estimated ratio to baseline                         | 1.00                      | 0.98                 | 0.93                 | 0.99                          | 0.98                   | 0.96                 | 0.92                 | 0.98                          |
| ETR vs sitagliptin (95% CI)                         | 1.01<br>(0.97, 1.06)      | 0.99<br>(0.95, 1.04) | 0.95<br>(0.90, 0.99) | –                             | 1.00<br>(0.95, 1.05)   | 0.98<br>(0.93, 1.03) | 0.94<br>(0.89, 0.98) | –                             |
| <i>P</i> value                                      | .58                       | .76                  | .02                  | –                             | .95                    | .41                  | .007                 | –                             |
| <b>Week 78</b>                                      |                           |                      |                      |                               |                        |                      |                      |                               |
| Estimated mean                                      | 29                        | 28                   | 27                   | 28                            | 28                     | 27                   | 27                   | 28                            |
| Estimated ratio to baseline                         | 0.95                      | 0.95                 | 0.92                 | 0.95                          | 0.92                   | 0.91                 | 0.90                 | 0.93                          |
| ETR vs sitagliptin (95% CI)                         | 1.01<br>(0.96, 1.06)      | 1.00<br>(0.95, 1.05) | 0.97<br>(0.92, 1.02) | –                             | 0.99<br>(0.93, 1.05)   | 0.97<br>(0.92, 1.03) | 0.97<br>(0.91, 1.02) | –                             |
| <i>P</i> value                                      | .82                       | .98                  | .21                  | –                             | .73                    | .35                  | .21                  | –                             |
| <b>High-density lipoprotein cholesterol (mg/dL)</b> |                           |                      |                      |                               |                        |                      |                      |                               |
| <b>Week 26</b>                                      |                           |                      |                      |                               |                        |                      |                      |                               |
| Estimated mean                                      | 43                        | 44                   | 44                   | 44                            | 43                     | 44                   | 44                   | 44                            |
| Estimated ratio to baseline                         | 0.97                      | 0.99                 | 0.98                 | 0.99                          | 0.97                   | 0.99                 | 0.98                 | 0.99                          |

|                              | Treatment policy estimand |                      |                      |                               | Trial product estimand |                      |                      |                               |
|------------------------------|---------------------------|----------------------|----------------------|-------------------------------|------------------------|----------------------|----------------------|-------------------------------|
|                              | Oral semaglutide          |                      |                      | Sitagliptin 100 mg<br>(N=467) | Oral semaglutide       |                      |                      | Sitagliptin 100 mg<br>(N=467) |
|                              | 3 mg<br>(N=466)           | 7 mg<br>(N=465)      | 14 mg<br>(N=465)     |                               | 3 mg<br>(N=466)        | 7 mg<br>(N=465)      | 14 mg<br>(N=465)     |                               |
| ETR vs sitagliptin (95% CI)  | 0.98<br>(0.96, 1.00)      | 1.00<br>(0.98, 1.02) | 0.99<br>(0.97, 1.01) | –                             | 0.98<br>(0.97, 1.00)   | 1.00<br>(0.98, 1.02) | 0.99<br>(0.97, 1.01) | –                             |
| <i>P</i> value               | .05                       | .98                  | .46                  | –                             | .07                    | .82                  | .36                  | –                             |
| <b>Week 52</b>               |                           |                      |                      |                               |                        |                      |                      |                               |
| Estimated mean               | 44                        | 45                   | 45                   | 44                            | 45                     | 46                   | 45                   | 45                            |
| Estimated ratio to baseline  | 0.99                      | 1.01                 | 1.01                 | 1.00                          | 1.00                   | 1.02                 | 1.01                 | 1.00                          |
| ETR vs sitagliptin (95% CI)  | 0.99<br>(0.97, 1.01)      | 1.01<br>(0.99, 1.03) | 1.01<br>(1.00, 1.03) | –                             | 1.00<br>(0.98, 1.02)   | 1.02<br>(1.00, 1.04) | 1.02<br>(0.99, 1.04) | –                             |
| <i>P</i> value               | .40                       | .27                  | .13                  | –                             | .89                    | .07                  | .14                  | –                             |
| <b>Week 78</b>               |                           |                      |                      |                               |                        |                      |                      |                               |
| Estimated mean               | 43                        | 44                   | 45                   | 44                            | 44                     | 45                   | 45                   | 44                            |
| Estimated ratio to baseline  | 0.97                      | 0.99                 | 1.00                 | 0.99                          | 0.98                   | 1.01                 | 1.00                 | 0.99                          |
| ETR vs sitagliptin (95% CI)  | 0.98<br>(0.96, 1.00)      | 1.00<br>(0.98, 1.02) | 1.01<br>(0.99, 1.03) | –                             | 0.99<br>(0.97, 1.02)   | 1.02<br>(1.00, 1.05) | 1.01<br>(0.99, 1.04) | –                             |
| <i>P</i> value               | .09                       | .85                  | .32                  | –                             | .55                    | .03                  | .22                  | –                             |
| <b>Triglycerides (mg/dL)</b> |                           |                      |                      |                               |                        |                      |                      |                               |
| <b>Week 26</b>               |                           |                      |                      |                               |                        |                      |                      |                               |
| Estimated mean               | 154                       | 150                  | 144                  | 152                           | 152                    | 150                  | 141                  | 151                           |
| Estimated ratio to baseline  | 0.99                      | 0.96                 | 0.92                 | 0.97                          | 0.98                   | 0.97                 | 0.91                 | 0.97                          |
| ETR vs sitagliptin (95% CI)  | 1.02<br>(0.97, 1.06)      | 0.99<br>(0.94, 1.04) | 0.95<br>(0.91, 0.99) | –                             | 1.01<br>(0.96, 1.06)   | 0.99<br>(0.95, 1.04) | 0.93<br>(0.89, 0.98) | –                             |
| <i>P</i> value               | .52                       | .63                  | .03                  | –                             | .71                    | .74                  | .003                 | –                             |

|                             | Treatment policy estimand |                      |                      |                               | Trial product estimand |                      |                      |                               |
|-----------------------------|---------------------------|----------------------|----------------------|-------------------------------|------------------------|----------------------|----------------------|-------------------------------|
|                             | Oral semaglutide          |                      |                      | Sitagliptin 100 mg<br>(N=467) | Oral semaglutide       |                      |                      | Sitagliptin 100 mg<br>(N=467) |
|                             | 3 mg<br>(N=466)           | 7 mg<br>(N=465)      | 14 mg<br>(N=465)     |                               | 3 mg<br>(N=466)        | 7 mg<br>(N=465)      | 14 mg<br>(N=465)     |                               |
| <b>Week 52</b>              |                           |                      |                      |                               |                        |                      |                      |                               |
| Estimated mean              | 155                       | 152                  | 145                  | 154                           | 151                    | 149                  | 142                  | 153                           |
| Estimated ratio to baseline | 1.00                      | 0.98                 | 0.93                 | 0.99                          | 0.98                   | 0.96                 | 0.92                 | 0.99                          |
| ETR vs sitagliptin (95% CI) | 1.01<br>(0.96, 1.06)      | 0.99<br>(0.94, 1.04) | 0.94<br>(0.90, 0.99) | –                             | 0.99<br>(0.94, 1.04)   | 0.97<br>(0.93, 1.02) | 0.93<br>(0.89, 0.98) | –                             |
| <i>P</i> value              | .72                       | .64                  | .01                  | –                             | .69                    | .30                  | .004                 | –                             |
| <b>Week 78</b>              |                           |                      |                      |                               |                        |                      |                      |                               |
| Estimated mean              | 149                       | 148                  | 143                  | 147                           | 144                    | 141                  | 140                  | 145                           |
| Estimated ratio to baseline | 0.96                      | 0.95                 | 0.92                 | 0.94                          | 0.93                   | 0.91                 | 0.90                 | 0.94                          |
| ETR vs sitagliptin (95% CI) | 1.01<br>(0.96, 1.07)      | 1.01<br>(0.96, 1.06) | 0.97<br>(0.92, 1.03) | –                             | 0.99<br>(0.93, 1.06)   | 0.97<br>(0.92, 1.03) | 0.97<br>(0.91, 1.02) | –                             |
| <i>P</i> value              | .60                       | .79                  | .32                  | –                             | .80                    | .39                  | .25                  | –                             |

Abbreviation: CI, confidence interval; ETD, estimated treatment difference; ETR, estimated treatment ratio.

<sup>a</sup> Self-monitored blood glucose is reported as plasma equivalent values of capillary whole blood glucose.

*P* values are unadjusted two-sided *P* values for the test of no difference. Fasting lipid profile endpoints were log-transformed prior to analysis with the associated log-transformed baseline value as a covariate.

Treatment policy estimand: Analysis of covariance for continuous endpoints and generalized linear model with binomial distribution and identity link for binary endpoints, using data irrespective of discontinuation of trial product or initiation of rescue medication. Missing values were imputed by a pattern mixture model using multiple imputation. Pattern was defined by randomized trial product and treatment status (premature trial product discontinuation and/or initiation of rescue medication).

Trial product estimand: Mixed model for repeated measurements for continuous endpoints and generalized linear model with binomial distribution and identity link for binary endpoints. Data collected after discontinuation of trial product or initiation of rescue medication were excluded. For binary endpoints, missing values were imputed from patients randomized to the same trial product using sequential multiple imputation.

**eTable 6. On-Treatment Adverse Events Leading to Discontinuation by System Organ Class/Preferred Term**

|                                                                                             | Oral semaglutide |                 |                  | Sitagliptin       |
|---------------------------------------------------------------------------------------------|------------------|-----------------|------------------|-------------------|
|                                                                                             | 3 mg<br>(N=466)  | 7 mg<br>(N=464) | 14 mg<br>(N=465) | 100 mg<br>(N=466) |
| <b>Adverse events leading to premature trial product discontinuation<sup>a</sup>, n (%)</b> | 26 (5.6)         | 27 (5.8)        | 54 (11.6)        | 24 (5.2)          |
| Gastrointestinal disorders                                                                  | 11 (2.4)         | 16 (3.4)        | 32 (6.9)         | 12 (2.6)          |
| Nausea                                                                                      | 2 (0.4)          | 7 (1.5)         | 13 (2.8)         | 5 (1.1)           |
| Diarrhea                                                                                    | 3 (0.6)          | 2 (0.4)         | 8 (1.7)          | 1 (0.2)           |
| Vomiting                                                                                    | 0                | 7 (1.5)         | 8 (1.7)          | 2 (0.4)           |
| Abdominal pain upper                                                                        | 1 (0.2)          | 2 (0.4)         | 3 (0.6)          | 0                 |
| Pancreatitis acute                                                                          | 1 (0.2)          | 1 (0.2)         | 3 (0.6)          | 1 (0.2)           |
| Abdominal pain                                                                              | 1 (0.2)          | 0               | 2 (0.4)          | 2 (0.4)           |
| Flatulence                                                                                  | 0                | 0               | 2 (0.4)          | 0                 |
| Gastroesophageal reflux disease                                                             | 0                | 1 (0.2)         | 2 (0.4)          | 0                 |
| Abdominal discomfort                                                                        | 0                | 1 (0.2)         | 1 (0.2)          | 1 (0.2)           |
| Abdominal distension                                                                        | 1 (0.2)          | 0               | 1 (0.2)          | 0                 |
| Abdominal tenderness                                                                        | 0                | 0               | 1 (0.2)          | 0                 |
| Dry mouth                                                                                   | 0                | 0               | 1 (0.2)          | 0                 |
| Eructation                                                                                  | 0                | 0               | 1 (0.2)          | 0                 |
| Gastritis                                                                                   | 0                | 1 (0.2)         | 1 (0.2)          | 1 (0.2)           |
| Dyspepsia                                                                                   | 3 (0.6)          | 1 (0.2)         | 0                | 0                 |
| Epigastric discomfort                                                                       | 0                | 1 (0.2)         | 0                | 0                 |
| Ileus paralytic                                                                             | 1 (0.2)          | 0               | 0                | 0                 |
| Mallory-Weiss syndrome                                                                      | 0                | 1 (0.2)         | 0                | 0                 |
| Pancreatic cyst                                                                             | 0                | 0               | 0                | 1 (0.2)           |
| Metabolism and nutrition disorders                                                          | 1 (0.2)          | 2 (0.4)         | 6 (1.3)          | 1 (0.2)           |
| Decreased appetite                                                                          | 1 (0.2)          | 2 (0.4)         | 6 (1.3)          | 0                 |
| Diabetes mellitus inadequate control                                                        | 0                | 0               | 0                | 1 (0.2)           |
| General disorders and administration site conditions                                        | 2 (0.4)          | 3 (0.6)         | 4 (0.9)          | 1 (0.2)           |
| Fatigue                                                                                     | 0                | 1 (0.2)         | 2 (0.4)          | 0                 |
| Malaise                                                                                     | 0                | 0               | 1 (0.2)          | 0                 |
| Pain                                                                                        | 0                | 0               | 1 (0.2)          | 0                 |
| Asthenia                                                                                    | 1 (0.2)          | 1 (0.2)         | 0                | 0                 |
| Chest discomfort                                                                            | 0                | 1 (0.2)         | 0                | 0                 |
| Chest pain                                                                                  | 0                | 0               | 0                | 1 (0.2)           |
| Pyrexia                                                                                     | 1 (0.2)          | 0               | 0                | 0                 |
| Investigations                                                                              | 2 (0.4)          | 2 (0.4)         | 4 (0.9)          | 2 (0.4)           |
| Weight decreased                                                                            | 1 (0.2)          | 0               | 2 (0.4)          | 0                 |
| Lipase increased                                                                            | 1 (0.2)          | 0               | 1 (0.2)          | 2 (0.4)           |
| Pancreatic enzymes increased                                                                | 0                | 0               | 1 (0.2)          | 0                 |
| Hepatic enzyme increased                                                                    | 0                | 1 (0.2)         | 0                | 0                 |
| Renal function test abnormal                                                                | 0                | 1 (0.2)         | 0                | 0                 |
| Nervous system disorders                                                                    | 1 (0.2)          | 0               | 4 (0.9)          | 1 (0.2)           |

|                                                           | Oral semaglutide |                 |                  | Sitagliptin<br>100 mg<br>(N=466) |
|-----------------------------------------------------------|------------------|-----------------|------------------|----------------------------------|
|                                                           | 3 mg<br>(N=466)  | 7 mg<br>(N=464) | 14 mg<br>(N=465) |                                  |
| Chronic inflammatory demyelinating polyradiculoneuropathy | 0                | 0               | 1 (0.2)          | 0                                |
| Dizziness                                                 | 0                | 0               | 1 (0.2)          | 0                                |
| Headache                                                  | 0                | 0               | 1 (0.2)          | 1 (0.2)                          |
| Ischemic stroke                                           | 1 (0.2)          | 0               | 1 (0.2)          | 0                                |
| Skin and subcutaneous tissue disorders                    | 2 (0.4)          | 1 (0.2)         | 3 (0.6)          | 1 (0.2)                          |
| Dermatosis                                                | 0                | 0               | 1 (0.2)          | 0                                |
| Pruritus                                                  | 0                | 0               | 1 (0.2)          | 0                                |
| Rash                                                      | 0                | 0               | 1 (0.2)          | 0                                |
| Alopecia                                                  | 0                | 1 (0.2)         | 0                | 0                                |
| Angioedema                                                | 1 (0.2)          | 0               | 0                | 0                                |
| Dermatitis allergic                                       | 0                | 0               | 0                | 1 (0.2)                          |
| Hyperhidrosis                                             | 1 (0.2)          | 0               | 0                | 0                                |
| Cardiac disorders                                         | 2 (0.4)          | 1 (0.2)         | 2 (0.4)          | 1 (0.2)                          |
| Cardiac failure congestive                                | 0                | 1 (0.2)         | 2 (0.4)          | 0                                |
| Acute coronary syndrome                                   | 0                | 0               | 0                | 1 (0.2)                          |
| Atrial fibrillation                                       | 2 (0.4)          | 0               | 0                | 0                                |
| Cardiac failure chronic                                   | 1 (0.2)          | 0               | 0                | 0                                |
| Ear and labyrinth disorders                               | 1 (0.2)          | 0               | 2 (0.4)          | 0                                |
| Vertigo                                                   | 0                | 0               | 2 (0.4)          | 0                                |
| Acute vestibular syndrome                                 | 1 (0.2)          | 0               | 0                | 0                                |
| Neurosensory hypoacusis                                   | 1 (0.2)          | 0               | 0                | 0                                |
| Tinnitus                                                  | 1 (0.2)          | 0               | 0                | 0                                |
| Injury, poisoning and procedural complications            | 1 (0.2)          | 0               | 2 (0.4)          | 0                                |
| Clavicle fracture                                         | 0                | 0               | 1 (0.2)          | 0                                |
| Medication error                                          | 0                | 0               | 1 (0.2)          | 0                                |
| Scapular fracture                                         | 1 (0.2)          | 0               | 0                | 0                                |
| Subarachnoid hemorrhage                                   | 0                | 0               | 0                | 0                                |
| Neoplasms benign, malignant and unspecified               | 0                | 1 (0.2)         | 2 (0.4)          | 2 (0.4)                          |
| Colon cancer                                              | 0                | 0               | 1 (0.2)          | 0                                |
| Plasma cell myeloma                                       | 0                | 0               | 0                | 1 (0.2)                          |
| Brain neoplasm malignant                                  | 0                | 0               | 0                | 1 (0.2)                          |
| Breast cancer                                             | 0                | 1 (0.2)         | 0                | 0                                |
| Rectal adenocarcinoma                                     | 0                | 0               | 0                | 0                                |
| Infections and infestations                               | 5 (1.1)          | 1 (0.2)         | 1 (0.2)          | 0                                |
| Helicobacter gastritis                                    | 0                | 0               | 1 (0.2)          | 0                                |
| Gastroenteritis                                           | 1 (0.2)          | 0               | 0                | 0                                |
| Influenza                                                 | 1 (0.2)          | 0               | 0                | 0                                |
| Peritonitis bacterial                                     | 1 (0.2)          | 0               | 0                | 0                                |
| Pyelonephritis acute                                      | 1 (0.2)          | 0               | 0                | 0                                |
| Subcutaneous abscess                                      | 0                | 1 (0.2)         | 0                | 0                                |

|                                                 | Oral semaglutide |                 |                  | Sitagliptin<br>100 mg<br>(N=466) |
|-------------------------------------------------|------------------|-----------------|------------------|----------------------------------|
|                                                 | 3 mg<br>(N=466)  | 7 mg<br>(N=464) | 14 mg<br>(N=465) |                                  |
| Urinary tract infection                         | 1 (0.2)          | 0               | 0                | 0                                |
| Musculoskeletal and connective tissue disorders | 0                | 0               | 1 (0.2)          | 2 (0.4)                          |
| Myalgia                                         | 0                | 0               | 1 (0.2)          | 0                                |
| Arthralgia                                      | 0                | 0               | 0                | 1 (0.2)                          |
| Osteoarthritis                                  | 0                | 0               | 0                | 1 (0.2)                          |
| Psychiatric disorders                           | 0                | 1 (0.2)         | 1 (0.2)          | 0                                |
| Libido decreased                                | 0                | 1 (0.2)         | 1 (0.2)          | 0                                |
| Renal and urinary disorders                     | 1 (0.2)          | 0               | 1 (0.2)          | 1 (0.2)                          |
| Urinary retention                               | 0                | 0               | 1 (0.2)          | 0                                |
| Acute kidney injury                             | 1 (0.2)          | 0               | 0                | 0                                |
| End stage renal disease                         | 0                | 0               | 0                | 1 (0.2)                          |
| Reproductive system and breast disorders        | 0                | 0               | 1 (0.2)          | 0                                |
| Prostatitis                                     | 0                | 0               | 1 (0.2)          | 0                                |
| Blood and lymphatic system disorders            | 1 (0.2)          | 0               | 0                | 0                                |
| Thrombocytopenia                                | 1 (0.2)          | 0               | 0                | 0                                |
| Endocrine disorders                             | 0                | 0               | 0                | 1 (0.2)                          |
| Goitre                                          | 0                | 0               | 0                | 1 (0.2)                          |
| Eye disorders                                   | 1 (0.2)          | 0               | 0                | 0                                |
| Vision blurred                                  | 1 (0.2)          | 0               | 0                | 0                                |
| Hepatobiliary disorders                         | 1 (0.2)          | 1 (0.2)         | 0                | 1 (0.2)                          |
| Chronic hepatic failure                         | 0                | 0               | 0                | 1 (0.2)                          |
| Hepatic cirrhosis                               | 1 (0.2)          | 0               | 0                | 0                                |
| Hepatitis                                       | 0                | 1 (0.2)         | 0                | 0                                |
| Immune system disorders                         | 0                | 2 (0.4)         | 0                | 0                                |
| Hypersensitivity                                | 0                | 1 (0.2)         | 0                | 0                                |
| Sarcoidosis                                     | 0                | 1 (0.2)         | 0                | 0                                |
| Respiratory, thoracic and mediastinal disorders | 0                | 1 (0.2)         | 0                | 0                                |
| Hemoptysis                                      | 0                | 1 (0.2)         | 0                | 0                                |
| Vascular disorders                              | 1 (0.2)          | 0               | 0                | 0                                |
| Hypertension                                    | 1 (0.2)          | 0               | 0                | 0                                |

<sup>a</sup> Patients could experience multiple events.

System organ class and preferred terms defined using Medical Dictionary for Regulatory Activities (version 20.1).

On-treatment: The period where the patient is considered treated with trial product.

**eTable 7. On-Treatment Hypoglycemic Episodes**

|                                                                                     | Oral semaglutide |              |                  | Sitagliptin<br>100 mg<br>(N=466) |
|-------------------------------------------------------------------------------------|------------------|--------------|------------------|----------------------------------|
|                                                                                     | 3 mg (N=466)     | 7 mg (N=464) | 14 mg<br>(N=465) |                                  |
| <b>All patients, n (%)</b>                                                          |                  |              |                  |                                  |
| Severe or BG-confirmed symptomatic hypoglycemia <sup>a</sup>                        | 23 (4.9)         | 24 (5.2)     | 36 (7.7)         | 39 (8.4)                         |
| Nocturnal <sup>b</sup> severe or BG-confirmed symptomatic hypoglycemia <sup>a</sup> | 9 (1.9)          | 2 (0.4)      | 6 (1.3)          | 5 (1.1)                          |
| ADA classification                                                                  | 102 (21.9)       | 108 (23.3)   | 131 (28.2)       | 112 (24.0)                       |
| Severe                                                                              | 0 (0.0)          | 0 (0.0)      | 1 (0.2)          | 4 (0.9)                          |
| <b>Patients on metformin alone, n (%)</b>                                           |                  |              |                  |                                  |
| Severe or BG-confirmed symptomatic hypoglycemia <sup>a</sup>                        | 246              | 247          | 245              | 248                              |
| Nocturnal <sup>b</sup> severe or BG-confirmed symptomatic hypoglycemia <sup>a</sup> | 1 (0.4)          | 5 (2.0)      | 6 (2.4)          | 4 (1.6)                          |
| Nocturnal <sup>b</sup> severe or BG-confirmed symptomatic hypoglycemia <sup>a</sup> | 0 (0.0)          | 1 (0.4)      | 0 (0.0)          | 0 (0.0)                          |
| ADA classification                                                                  | 29 (11.8)        | 35 (14.2)    | 38 (15.5)        | 28 (11.3)                        |
| Severe                                                                              | 0 (0.0)          | 0 (0.0)      | 1 (0.4)          | 1 (0.4)                          |
| <b>Patients on metformin and sulfonylurea, n (%)</b>                                |                  |              |                  |                                  |
| Severe or BG-confirmed symptomatic hypoglycemia <sup>a</sup>                        | 220              | 217          | 220              | 218                              |
| Nocturnal <sup>b</sup> severe or BG-confirmed symptomatic hypoglycemia <sup>a</sup> | 22 (10.0)        | 19 (8.8)     | 30 (13.6)        | 35 (16.1)                        |
| Nocturnal <sup>b</sup> severe or BG-confirmed symptomatic hypoglycemia <sup>a</sup> | 9 (4.1)          | 1 (0.5)      | 6 (2.7)          | 5 (2.3)                          |
| ADA classification                                                                  | 73 (33.2)        | 73 (33.6)    | 93 (42.3)        | 84 (38.5)                        |
| Severe                                                                              | 0 (0.0)          | 0 (0.0)      | 0 (0.0)          | 3 (1.4)                          |

Abbreviation: ADA, American Diabetes Association; BG, blood glucose.

<sup>a</sup> Reported episodes were either severe (defined according to the American Diabetes Association classification) or confirmed by a blood glucose value <56 mg/dL (3.1 mmol/L), with symptoms consistent with hypoglycemia.

<sup>b</sup> Episodes with onset between 00:01 and 05:59 (inclusive).

SI conversion factor: To convert glucose to mmol/L, multiply by 0.055494.

On treatment: The period where the patient is considered treated with trial product.



**eTable 8. In-Trial Adverse Events Related to Diabetic Retinopathy**

| Preferred term                                           | Oral semaglutide |              |               | Sitagliptin<br>100 mg (N=466) |
|----------------------------------------------------------|------------------|--------------|---------------|-------------------------------|
|                                                          | 3 mg (N=466)     | 7 mg (N=464) | 14 mg (N=465) |                               |
| <b>Number of patients with at least one event, n (%)</b> |                  |              |               |                               |
| Eye disorders                                            | 31 (6.7)         | 28 (6.0)     | 26 (5.6)      | 36 (7.7)                      |
| Diabetic retinopathy                                     | 28 (6.0)         | 24 (5.2)     | 17 (3.7)      | 29 (6.2)                      |
| Retinopathy                                              | 1 (0.2)          | 2 (0.4)      | 4 (0.9)       | 0                             |
| Retinal hemorrhage                                       | 1 (0.2)          | 0 (0.0)      | 3 (0.6)       | 2 (0.4)                       |
| Macular edema                                            | 0                | 2 (0.4)      | 2 (0.4)       | 1 (0.2)                       |
| Maculopathy                                              | 0                | 1 (0.2)      | 1 (0.2)       | 1 (0.2)                       |
| Diabetic retinal edema                                   | 3 (0.6)          | 0            | 0             | 1 (0.2)                       |
| Retinal detachment                                       | 0                | 1 (0.2)      | 0             | 1 (0.2)                       |
| Retinopathy proliferative                                | 0                | 0            | 0             | 1 (0.2)                       |
| Vitreous detachment                                      | 1 (0.2)          | 0            | 0             | 2 (0.4)                       |
| Vitreous hemorrhage                                      | 0                | 1 (0.2)      | 0             | 1 (0.2)                       |

Events identified using Medical Dictionary for Regulatory Activities (version 20.1) terms.

In-trial: The period where the patient is considered to be in the trial regardless of trial product discontinuation.

**eTable 9. External Event Adjudication Committee–Confirmed Events and Selected In-Trial Adverse Events**

| Preferred term                                           | Oral semaglutide |                 |                  | Sitagliptin<br>100 mg<br>(N=466) |
|----------------------------------------------------------|------------------|-----------------|------------------|----------------------------------|
|                                                          | 3 mg<br>(N=466)  | 7 mg<br>(N=464) | 14 mg<br>(N=465) |                                  |
| <b>Number of patients with at least one event, n (%)</b> |                  |                 |                  |                                  |
| Death                                                    | 5 (1.1)          | 3 (0.6)         | 1 (0.2)          | 3 (0.6)                          |
| Sudden cardiac death                                     | 0                | 0               | 1 (0.2)          | 0                                |
| Stroke                                                   | 2 (0.4)          | 0               | 0                | 0                                |
| Renal causes                                             | 1 (0.2)          | 0               | 0                | 0                                |
| Malignancy                                               | 0                | 0               | 0                | 1 (0.2)                          |
| Pancreatic causes                                        | 1 (0.2)          | 0               | 0                | 0                                |
| Neurological                                             | 0                | 1 (0.2)         | 0                | 0                                |
| Infection                                                | 1 (0.2)          | 0               | 0                | 0                                |
| Hepatobiliary causes                                     | 0                | 0               | 0                | 1 (0.2)                          |
| Undetermined cause                                       | 0                | 2 (0.4)         | 0                | 1 (0.2)                          |
| Acute kidney injury                                      | 3 (0.6)          | 2 (0.4)         | 5 (1.1)          | 3 (0.6)                          |
| Acute pancreatitis                                       | 1 (0.2)          | 1 (0.2)         | 1 (0.2)          | 1 (0.2)                          |
| Cardiovascular events                                    | 15 (3.2)         | 7 (1.5)         | 5 (1.1)          | 10 (2.1)                         |
| Acute coronary syndrome                                  | 4 (0.9)          | 4 (0.9)         | 1 (0.2)          | 4 (0.9)                          |
| Acute myocardial infarction                              | 3 (0.6)          | 1 (0.2)         | 0                | 2 (0.4)                          |
| Unstable angina pectoris                                 | 2 (0.4)          | 3 (0.6)         | 1 (0.2)          | 1 (0.2)                          |
| Cerebrovascular events                                   | 7 (1.5)          | 1 (0.2)         | 2 (0.4)          | 2 (0.4)                          |
| Stroke                                                   | 6 (1.3)          | 1 (0.2)         | 2 (0.4)          | 1 (0.2)                          |
| Transient ischemic attack                                | 1 (0.2)          | 0               | 0                | 1 (0.2)                          |
| Cardiovascular and undetermined cause of death           | 2 (0.4)          | 2 (0.4)         | 1 (0.2)          | 1 (0.2)                          |
| Cardiovascular death                                     | 2 (0.4)          | 0               | 1 (0.2)          | 0                                |
| Undetermined cause of death                              | 0                | 2 (0.4)         | 0                | 1 (0.2)                          |
| Heart failure                                            | 4 (0.9)          | 0               | 1 (0.2)          | 3 (0.6)                          |
| Malignant neoplasm <sup>a</sup>                          | 5 (1.1)          | 9 (1.9)         | 3 (0.6)          | 7 (1.5)                          |
| Skin cancer                                              | 2 (0.4)          | 4 (0.9)         | 0                | 1 (0.2)                          |
| Breast cancer                                            | 0                | 2 (0.4)         | 0                | 2 (0.4)                          |
| Colorectal cancer                                        | 0                | 1 (0.2)         | 1 (0.2)          | 2 (0.4)                          |
| Gastrointestinal cancer                                  | 0                | 0               | 1 (0.2)          | 2 (0.4)                          |
| Pancreas                                                 | 0                | 0               | 1 (0.2)          | 1 (0.2)                          |
| Stomach                                                  | 0                | 0               | 0                | 1 (0.2)                          |
| Prostate                                                 | 2 (0.4)          | 1 (0.2)         | 0                | 0                                |
| Lymphoid neoplasm                                        | 0                | 1 (0.2)         | 1 (0.2)          | 0                                |
| Lung cancer                                              | 0                | 0               | 0                | 1 (0.2)                          |
| Unknown primary site                                     | 1 (0.2)          | 0               | 0                | 0                                |
| Lactic acidosis                                          | 0                | 1 (0.2)         | 0                | 0                                |

<sup>a</sup> Excludes malignant thyroid neoplasms.

In-trial: The period where the patient is considered to be in the trial regardless of trial product discontinuation.

**eTable 10. Additional Safety Parameters**

|                                      | In-trial observation period |                 |                  |                                  | On-treatment observation period |                 |                  |                                  |
|--------------------------------------|-----------------------------|-----------------|------------------|----------------------------------|---------------------------------|-----------------|------------------|----------------------------------|
|                                      | Oral semaglutide            |                 |                  | Sitagliptin<br>100 mg<br>(N=466) | Oral semaglutide                |                 |                  | Sitagliptin<br>100 mg<br>(N=466) |
|                                      | 3 mg<br>(N=466)             | 7 mg<br>(N=464) | 14 mg<br>(N=465) |                                  | 3 mg<br>(N=466)                 | 7 mg<br>(N=464) | 14 mg<br>(N=465) |                                  |
| <b>Systolic blood pressure, mmHg</b> |                             |                 |                  |                                  |                                 |                 |                  |                                  |
| <b>Week 26</b>                       |                             |                 |                  |                                  |                                 |                 |                  |                                  |
| Estimated mean                       | 133                         | 131             | 131              | 132                              | 132                             | 131             | 131              | 132                              |
| Estimated mean change from baseline  | -1                          | -3              | -3               | -2                               | -1                              | -3              | -3               | -2                               |
| ETD vs sitagliptin (95% CI)          | 1 (-1, 2)                   | -1 (-3, 1)      | -1 (-3, 1)       | -                                | 0 (-1, 2)                       | -1 (-2, 1)      | -1 (-3, 1)       | -                                |
| <i>P</i> value                       | .40                         | .32             | .25              | -                                | .60                             | .46             | .19              | -                                |
| <b>Week 52</b>                       |                             |                 |                  |                                  |                                 |                 |                  |                                  |
| Estimated mean                       | 132                         | 129             | 131              | 133                              | 132                             | 129             | 131              | 133                              |
| Estimated mean change from baseline  | -2                          | -5              | -3               | -1                               | -2                              | -4              | -3               | -1                               |
| ETD vs sitagliptin (95% CI)          | -1 (-3, 0)                  | -4 (-6, -2)     | -2 (-4, -1)      | -                                | -1 (-3, 0)                      | -4 (-5, -2)     | -2 (-4, -1)      | -                                |
| <i>P</i> value                       | .15                         | <.001           | .01              | -                                | .16                             | <.001           | .009             | -                                |
| <b>Week 78</b>                       |                             |                 |                  |                                  |                                 |                 |                  |                                  |
| Estimated mean                       | 133                         | 130             | 131              | 133                              | 132                             | 131             | 131              | 134                              |
| Estimated mean change from baseline  | -1                          | -3              | -3               | 0                                | -2                              | -3              | -3               | 0                                |
| ETD vs sitagliptin (95% CI)          | -1 (-3, 1)                  | -3 (-5, -1)     | -2 (-4, -0)      | -                                | -1 (-3, 0)                      | -3 (-5, -1)     | -2 (-4, -0)      | -                                |
| <i>P</i> value                       | .33                         | .001            | .02              | -                                | .12                             | .002            | .01              | -                                |

|                                       | In-trial observation period |                 |                  |                                  | On-treatment observation period |                 |                  |                                  |
|---------------------------------------|-----------------------------|-----------------|------------------|----------------------------------|---------------------------------|-----------------|------------------|----------------------------------|
|                                       | Oral semaglutide            |                 |                  | Sitagliptin<br>100 mg<br>(N=466) | Oral semaglutide                |                 |                  | Sitagliptin<br>100 mg<br>(N=466) |
|                                       | 3 mg<br>(N=466)             | 7 mg<br>(N=464) | 14 mg<br>(N=465) |                                  | 3 mg<br>(N=466)                 | 7 mg<br>(N=464) | 14 mg<br>(N=465) |                                  |
| <b>Diastolic blood pressure, mmHg</b> |                             |                 |                  |                                  |                                 |                 |                  |                                  |
| <b>Week 26</b>                        |                             |                 |                  |                                  |                                 |                 |                  |                                  |
| Estimated mean                        | 79                          | 80              | 80               | 80                               | 79                              | 80              | 80               | 80                               |
| Estimated mean change from baseline   | -1                          | -1              | -1               | -0                               | -1                              | -0              | -0               | -0                               |
| ETD vs sitagliptin (95% CI)           | -1 (-2, 1)                  | -0 (-1, 1)      | -0 (-1, 1)       | -                                | -1 (-2, 0)                      | -0 (-1, 1)      | -1 (-1, 1)       | -                                |
| <i>P</i> value                        | .31                         | .69             | .63              | -                                | .17                             | .73             | .64              | -                                |
| <b>Week 52</b>                        |                             |                 |                  |                                  |                                 |                 |                  |                                  |
| Estimated mean                        | 78                          | 79              | 79               | 79                               | 78                              | 79              | 79               | 79                               |
| Estimated mean change from baseline   | -2                          | -1              | -2               | -1                               | -2                              | -1              | -1               | -1                               |
| ETD vs sitagliptin (95% CI)           | -1 (-2, -0)                 | -0 (-1, 1)      | -1 (-2, 0)       | -                                | -1 (-2, 0)                      | -0 (-1, 1)      | -0 (-1, 1)       | -                                |
| <i>P</i> value                        | .03                         | .53             | .28              | -                                | .09                             | .75             | .77              | -                                |
| <b>Week 78</b>                        |                             |                 |                  |                                  |                                 |                 |                  |                                  |
| Estimated mean                        | 79                          | 79              | 79               | 79                               | 79                              | 79              | 79               | 79                               |
| Estimated mean change from baseline   | -1                          | -1              | -1               | -1                               | -1                              | -1              | -1               | -1                               |
| ETD vs sitagliptin (95% CI)           | -0 (-2, 1)                  | -0 (-2, 1)      | -0 (-1, 1)       | -                                | -0 (-1, 1)                      | 0 (-1, 1)       | 0 (-1, 1)        | -                                |
| <i>P</i> value                        | .56                         | .63             | .64              | -                                | .69                             | .84             | .96              | -                                |
| <b>Pulse rate, beats per minute</b>   |                             |                 |                  |                                  |                                 |                 |                  |                                  |
| <b>Week 26</b>                        |                             |                 |                  |                                  |                                 |                 |                  |                                  |
| Estimated mean                        | 75                          | 76              | 77               | 75                               | 75                              | 76              | 77               | 75                               |
| Estimated mean change from baseline   | 1                           | 2               | 2                | 0                                | 1                               | 2               | 2                | 0                                |
| ETD vs sitagliptin (95% CI)           | 0 (-1, 1)                   | 1 (0, 3)        | 2 (1, 3)         | -                                | 1 (-0, 2)                       | 2 (1, 3)        | 2 (1, 3)         | -                                |

|                                     | In-trial observation period |                      |                      |                                  | On-treatment observation period |                      |                      |                                  |
|-------------------------------------|-----------------------------|----------------------|----------------------|----------------------------------|---------------------------------|----------------------|----------------------|----------------------------------|
|                                     | Oral semaglutide            |                      |                      | Sitagliptin<br>100 mg<br>(N=466) | Oral semaglutide                |                      |                      | Sitagliptin<br>100 mg<br>(N=466) |
|                                     | 3 mg<br>(N=466)             | 7 mg<br>(N=464)      | 14 mg<br>(N=465)     |                                  | 3 mg<br>(N=466)                 | 7 mg<br>(N=464)      | 14 mg<br>(N=465)     |                                  |
| <i>P</i> value                      | .52                         | .01                  | <.001                | –                                | .23                             | .001                 | <.001                | –                                |
| <b>Week 52</b>                      |                             |                      |                      |                                  |                                 |                      |                      |                                  |
| Estimated mean                      | 75                          | 76                   | 76                   | 74                               | 75                              | 76                   | 76                   | 74                               |
| Estimated mean change from baseline | 0                           | 1                    | 1                    | –0                               | 1                               | 2                    | 2                    | –0                               |
| ETD vs sitagliptin (95% CI)         | 1 (–1, 2)                   | 1 (0, 3)             | 1 (0, 2)             | –                                | 1 (–0, 2)                       | 2 (1, 3)             | 2 (1, 3)             | –                                |
| <i>P</i> value                      | .36                         | .01                  | .02                  | –                                | .12                             | .003                 | <.001                | –                                |
| <b>Week 78</b>                      |                             |                      |                      |                                  |                                 |                      |                      |                                  |
| Estimated mean                      | 75                          | 76                   | 76                   | 75                               | 76                              | 76                   | 76                   | 75                               |
| Estimated mean change from baseline | 1                           | 1                    | 1                    | 0                                | 1                               | 1                    | 2                    | 0                                |
| ETD vs sitagliptin (95% CI)         | 1 (–1, 2)                   | 1 (–0, 2)            | 1 (–0, 2)            | –                                | 1 (–0, 2)                       | 1 (0, 2)             | 2 (1, 3)             | –                                |
| <i>P</i> value                      | .34                         | .17                  | .11                  | –                                | .12                             | .05                  | .003                 | –                                |
| <b>Lipase, U/L</b>                  |                             |                      |                      |                                  |                                 |                      |                      |                                  |
| <b>Week 26</b>                      |                             |                      |                      |                                  |                                 |                      |                      |                                  |
| Estimated mean                      | 36                          | 39                   | 42                   | 39                               | 36                              | 39                   | 43                   | 39                               |
| Estimated ratio to baseline         | 1.05                        | 1.13                 | 1.22                 | 1.13                             | 1.06                            | 1.14                 | 1.26                 | 1.13                             |
| ETR vs sitagliptin (95% CI)         | 0.93<br>(0.87, 0.99)        | 1.00<br>(0.94, 1.07) | 1.08<br>(1.01, 1.15) | –                                | 0.94<br>(0.88, 1.00)            | 1.01<br>(0.94, 1.07) | 1.11<br>(1.04, 1.18) | –                                |
| <i>P</i> value                      | .02                         | .99                  | .03                  | –                                | .05                             | .84                  | .002                 | –                                |
| <b>Week 52</b>                      |                             |                      |                      |                                  |                                 |                      |                      |                                  |
| Estimated mean                      | 35                          | 40                   | 41                   | 39                               | 36                              | 40                   | 43                   | 39                               |
| Estimated ratio to baseline         | 1.04                        | 1.16                 | 1.21                 | 1.14                             | 1.05                            | 1.16                 | 1.25                 | 1.15                             |

|                             | In-trial observation period |                      |                      |                                  | On-treatment observation period |                      |                      |                                  |
|-----------------------------|-----------------------------|----------------------|----------------------|----------------------------------|---------------------------------|----------------------|----------------------|----------------------------------|
|                             | Oral semaglutide            |                      |                      | Sitagliptin<br>100 mg<br>(N=466) | Oral semaglutide                |                      |                      | Sitagliptin<br>100 mg<br>(N=466) |
|                             | 3 mg<br>(N=466)             | 7 mg<br>(N=464)      | 14 mg<br>(N=465)     |                                  | 3 mg<br>(N=466)                 | 7 mg<br>(N=464)      | 14 mg<br>(N=465)     |                                  |
| ETR vs sitagliptin (95% CI) | 0.91<br>(0.85, 0.97)        | 1.02<br>(0.95, 1.08) | 1.05<br>(0.99, 1.12) | –                                | 0.92<br>(0.86, 0.98)            | 1.01<br>(0.95, 1.08) | 1.08<br>(1.02, 1.15) | –                                |
| <i>P</i> value              | .002                        | .61                  | .10                  | –                                | .007                            | .75                  | .02                  | –                                |
| <b>Week 78</b>              |                             |                      |                      |                                  |                                 |                      |                      |                                  |
| Estimated mean              | 35                          | 40                   | 40                   | 37                               | 35                              | 40                   | 41                   | 38                               |
| Estimated ratio to baseline | 1.03                        | 1.17                 | 1.16                 | 1.09                             | 1.03                            | 1.16                 | 1.19                 | 1.11                             |
| ETR vs sitagliptin (95% CI) | 0.94<br>(0.88, 1.01)        | 1.07<br>(1.00, 1.14) | 1.06<br>(0.99, 1.13) | –                                | 0.93<br>(0.87, 0.99)            | 1.04<br>(0.98, 1.11) | 1.07<br>(1.00, 1.14) | –                                |
| <i>P</i> value              | .07                         | .05                  | .08                  | –                                | .03                             | .22                  | .05                  | –                                |

|                                                                           | In-trial observation period |                      |                      |                                  | On-treatment observation period |                      |                      |                                  |
|---------------------------------------------------------------------------|-----------------------------|----------------------|----------------------|----------------------------------|---------------------------------|----------------------|----------------------|----------------------------------|
|                                                                           | Oral semaglutide            |                      |                      | Sitagliptin<br>100 mg<br>(N=466) | Oral semaglutide                |                      |                      | Sitagliptin<br>100 mg<br>(N=466) |
|                                                                           | 3 mg<br>(N=466)             | 7 mg<br>(N=464)      | 14 mg<br>(N=465)     |                                  | 3 mg<br>(N=466)                 | 7 mg<br>(N=464)      | 14 mg<br>(N=465)     |                                  |
| <b>Amylase, U/L</b>                                                       |                             |                      |                      |                                  |                                 |                      |                      |                                  |
| <b>Week 26</b>                                                            |                             |                      |                      |                                  |                                 |                      |                      |                                  |
| Estimated mean                                                            | 54                          | 57                   | 59                   | 57                               | 55                              | 57                   | 60                   | 57                               |
| Estimated ratio to baseline                                               | 1.03                        | 1.07                 | 1.13                 | 1.07                             | 1.03                            | 1.07                 | 1.14                 | 1.07                             |
| ETR vs sitagliptin (95% CI)                                               | 0.96<br>(0.93, 0.99)        | 1.00<br>(0.97, 1.03) | 1.05<br>(1.01, 1.08) | –                                | 0.96<br>(0.93, 0.99)            | 1.00<br>(0.97, 1.03) | 1.06<br>(1.03, 1.10) | –                                |
| <i>P</i> value                                                            | .01                         | .95                  | .005                 | –                                | .02                             | .96                  | <.001                | –                                |
| <b>Week 52</b>                                                            |                             |                      |                      |                                  |                                 |                      |                      |                                  |
| Estimated mean                                                            | 54                          | 58                   | 58                   | 56                               | 54                              | 58                   | 59                   | 57                               |
| Estimated ratio to baseline                                               | 1.02                        | 1.09                 | 1.11                 | 1.07                             | 1.03                            | 1.09                 | 1.12                 | 1.07                             |
| ETR vs sitagliptin (95% CI)                                               | 0.96<br>(0.93, 0.99)        | 1.02<br>(0.99, 1.06) | 1.04<br>(1.00, 1.07) | –                                | 0.96<br>(0.93, 0.99)            | 1.02<br>(0.98, 1.05) | 1.04<br>(1.01, 1.08) | –                                |
| <i>P</i> value                                                            | .01                         | .21                  | .03                  | –                                | .02                             | .32                  | .01                  | –                                |
| <b>Week 78</b>                                                            |                             |                      |                      |                                  |                                 |                      |                      |                                  |
| Estimated mean                                                            | 54                          | 58                   | 57                   | 56                               | 54                              | 58                   | 58                   | 57                               |
| Estimated ratio to baseline                                               | 1.02                        | 1.10                 | 1.09                 | 1.07                             | 1.03                            | 1.09                 | 1.10                 | 1.08                             |
| ETR vs sitagliptin (95% CI)                                               | 0.96<br>(0.92, 0.99)        | 1.03<br>(0.99, 1.07) | 1.02<br>(0.98, 1.06) | –                                | 0.95<br>(0.92, 0.99)            | 1.02<br>(0.98, 1.05) | 1.02<br>(0.99, 1.06) | –                                |
| <i>P</i> value                                                            | .02                         | .11                  | .31                  | –                                | .007                            | .35                  | .26                  | –                                |
| <b>Estimated glomerular filtration rate<sup>a</sup> ratio to baseline</b> |                             |                      |                      |                                  |                                 |                      |                      |                                  |
| <b>Week 26</b>                                                            |                             |                      |                      |                                  |                                 |                      |                      |                                  |
| Geometric mean (CV)                                                       | 0.99 (10.9)                 | 0.98 (10.0)          | 0.98 (10.3)          | 0.97 (9.5)                       | 0.99 (10.9)                     | 0.98 (10.1)          | 0.98 (10.5)          | 0.97 (9.3)                       |

|                     | In-trial observation period |                 |                  |                                  | On-treatment observation period |                 |                  |                                  |
|---------------------|-----------------------------|-----------------|------------------|----------------------------------|---------------------------------|-----------------|------------------|----------------------------------|
|                     | Oral semaglutide            |                 |                  | Sitagliptin<br>100 mg<br>(N=466) | Oral semaglutide                |                 |                  | Sitagliptin<br>100 mg<br>(N=466) |
|                     | 3 mg<br>(N=466)             | 7 mg<br>(N=464) | 14 mg<br>(N=465) |                                  | 3 mg<br>(N=466)                 | 7 mg<br>(N=464) | 14 mg<br>(N=465) |                                  |
| <b>Week 52</b>      |                             |                 |                  |                                  |                                 |                 |                  |                                  |
| Geometric mean (CV) | 0.99 (12.5)                 | 0.98 (11.2)     | 0.98 (12.0)      | 0.98 (11.6)                      | 0.99 (12.9)                     | 0.98 (11.3)     | 0.98 (11.7)      | 0.98 (11.5)                      |
| <b>Week 78</b>      |                             |                 |                  |                                  |                                 |                 |                  |                                  |
| Geometric mean (CV) | 0.99 (14.6)                 | 0.98 (10.7)     | 0.98 (12.7)      | 0.98 (10.8)                      | 0.99 (13.5)                     | 0.98 (10.8)     | 0.98 (11.8)      | 0.98 (10.9)                      |

Abbreviation: CI, confidence interval; CKD-EPI, Chronic Kidney Disease Epidemiology Collaboration; CV, coefficient of variation; ETD, estimated treatment difference; ETR, estimated treatment ratio.

<sup>a</sup> Glomerular filtration rate was estimated by the CKD-EPI formula.

*P* values are unadjusted two-sided *P* values for the test of no difference. Lipase and amylase were log-transformed prior to analysis with the associated log-transformed baseline value as a covariate.

In-trial: Analysis of covariance using data irrespective of discontinuation of trial product or initiation of rescue medication. Missing values were imputed by a pattern mixture model using multiple imputation. Pattern was defined by randomized trial product and treatment status (premature trial product discontinuation and/or initiation of rescue medication).

On-treatment: Mixed model for repeated measurements. Data collected after discontinuation of trial product were excluded.



**eTable 11. In-Trial Anti-Semaglutide Antibodies**

|                                      | Oral semaglutide |              |               |
|--------------------------------------|------------------|--------------|---------------|
|                                      | 3 mg (N=466)     | 7 mg (N=464) | 14 mg (N=465) |
| <b>Week 0</b>                        |                  |              |               |
| Patients with positive result, n (%) | 0 (0.0)          | 1 (0.2)      | 0 (0.0)       |
| Mean (SD) concentration, %B/T        | –                | 2.84 (0.00)  | –             |
| <b>Week 4</b>                        |                  |              |               |
| Patients with positive result, n (%) | 0 (0.0)          | 0 (0.0)      | 1 (0.2)       |
| Mean (SD) concentration, %B/T        | –                | –            | 9.82 (0.00)   |
| <b>Week 8</b>                        |                  |              |               |
| Patients with positive result, n (%) | 1 (0.2)          | 0 (0.0)      | 0 (0.0)       |
| Mean (SD) concentration, %B/T        | 1.93 (0.00)      | –            | –             |
| <b>Week 14</b>                       |                  |              |               |
| Patients with positive result, n (%) | 0 (0.0)          | 1 (0.2)      | 0 (0.0)       |
| Mean (SD) concentration, %B/T        | –                | 3.28 (0.00)  | –             |
| <b>Week 26</b>                       |                  |              |               |
| Patients with positive result, n (%) | 0 (0.0)          | 1 (0.2)      | 1 (0.2)       |
| Mean (SD) concentration, %B/T        | –                | 2.39 (0.00)  | 2.05 (0.00)   |
| <b>Week 38</b>                       |                  |              |               |
| Patients with positive result, n (%) | 0 (0.0)          | 0 (0.0)      | 1 (0.2)       |
| Mean (SD) concentration, %B/T        | –                | –            | 2.24 (0.00)   |
| <b>Week 52</b>                       |                  |              |               |
| Patients with positive result, n (%) | 0 (0.0)          | 0 (0.0)      | 0 (0.0)       |
| Mean (SD) concentration, %B/T        | –                | –            | –             |
| <b>Week 78</b>                       |                  |              |               |
| Patients with positive result, n (%) | 0 (0.0)          | 0 (0.0)      | 0 (0.0)       |
| Mean (SD) concentration, %B/T        | –                | –            | –             |
| <b>Week 83</b>                       |                  |              |               |
| Patients with positive result, n (%) | 0 (0.0)          | 0 (0.0)      | 0 (0.0)       |
| Mean (SD) concentration, %B/T        | –                | –            | –             |

Abbreviation: B/T, bound/total; SD, standard deviation.

In-trial: The period where the patient is considered to be in the trial regardless of trial product discontinuation.

## eReferences

1. Maruish ME, eds. *User's manual for the SF-36v2 Health Survey*. 3rd ed. Lincoln, RI: QualityMetric Incorporated; 2011.
2. Norman GR, Sloan JA, Wyrwich KW. Interpretation of changes in health-related quality of life: the remarkable universality of half a standard deviation. *Med Care*. 2003;41(5):582–592.
3. International council for harmonisation of technical requirements for pharmaceuticals for human use. ICH harmonised tripartite guideline. estimands and sensitivity analysis in clinical trials E9 (R1). 2017; <https://www.ich.org/products/guidelines/efficacy/article/efficacy-guidelines.html>. Accessed December 2018.
4. Bretz F, Posch M, Glimm E, Klinglmueller F, Maurer W, Rohmeyer K. Graphical approaches for multiple comparison procedures using weighted Bonferroni, Simes, or parametric tests. *Biom J*. 2011;53(6):894–913.
5. Little RJA, Rubin DB. *Statistical Analysis With Missing Data*. New York, NY: John Wiley & Sons; 1987.
6. Koch GG. Comments on 'Current issues in non-inferiority trials' by Thomas R. Fleming, statistics in medicine. *Stat Med*. 2008;27(3):333–342.
7. Keene ON, Roger JH, Hartley BF, Kenward MG. Missing data sensitivity analysis for recurrent event data using controlled imputation. *Pharm Stat*. 2014;13(4):258–264.
