# Supplementary material
Source: PubMed Central journal article supplement (PMC6484814)
Supplement: jama-321-1466-s004.pdf [file jama-321-1466-s004.pdf]

Rosenstock J, Allison D, Birkenfeld AL, et al; for the PIONEER 3 Investigators. Effect of additional oral semaglutide vs sitagliptin on glycosylated hemoglobin in adults with type 2 diabetes uncontrolled with metformin alone or with sulfonylurea: the PIONEER 3 randomized clinical trial [published online March 23, 2019]. JAMA. doi:10.1001/jama.2019.2942

## Data Sharing Statement

### Data

**Data available:** Yes

**Data types:** Deidentified participant data

**How to access data:** Data will be shared with bonafide researchers submitting a research proposal approved by the independent review board. Access request proposals can be found at [www.novonordisk-trials.com](http://www.novonordisk-trials.com).

**When available:** beginning date: 12-21-2028

### Supporting Documents

**Document types:** None

### Additional Information

**Who can access the data:** Bonafide researchers submitting a research proposal approved by the independent review board.

**Types of analyses:** For use as approved by the Independent Review Board according to the IRB Charter (see [novonordisk-trials.com](http://novonordisk-trials.com)).

**Mechanisms of data availability:** Individual participant data will be shared in data sets in a de-identified/anonymised format using a specialised SAS data platform, following approval of a research proposal.

**Any additional restrictions:** Data will be made available after research completion, approval of the product and product use in the European Union and USA.
